# Supplementary material for: Modelling temperature-dependent properties of polymorphic organic molecular crystals
Source: Phys Chem Chem Phys. 2016 Oct 31;18(45):31132–43. doi: 10.1039/c6cp05447a (PMC5299590; doi:10.1039/c6cp05447a)
Supplement: Supplementary file 3 [file CP-018-C6CP05447A-s003.csv]

Name	InChi	Z	Z_prime	Formula	Cell_Volume	Exp_Tm	Pred_Tm	Th_Press	SMILES	Bulk_modulus	Shear_modulus	Th_exp
ABAKEV	InChI=1S/C10H7NO/c12-7-9-6-5-8-3-1-2-4-10(8)11-9/h1-7H	8	2	H7C10ON	1562.9152	-	354.7	575.94	O=Cc1ccc2c(n1)cccc2	12.08207	3.04774	233.43
ABAKEV01	InChI=1S/C10H7NO/c12-7-9-6-5-8-3-1-2-4-10(8)11-9/h1-7H	4	1	H7C10ON	792.0693	-	354.7	458.45	O=Cc1ccc2c(n1)cccc2	9.13683	1.74169	255.10
ABUDAD	InChI=1S/C13H23NO/c15-13-11-9-7-5-3-1-2-4-6-8-10-12(11)14-13/h11-12H	1-10H2	(H	14	15)/t11-	12-/m0/s1	4	1	H23C13ON	1237.8138	-	399.1	419.06	O=C1N[C@@H]2[C@@H]1CCCCCCCCCC2	10.04434	4.78413	166.90
ABUDAD01	InChI=1S/C13H23NO/c15-13-11-9-7-5-3-1-2-4-6-8-10-12(11)14-13/h11-12H	1-10H2	(H	14	15)/t11-	12-/m0/s1	4	1	H23C13ON	1241.3671	-	399.1	377.46	O=C1N[C@@H]2[C@@H]1CCCCCCCCCC2	9.01473	3.78329	177.32
ACEMID03	InChI=1S/C2H5NO/c1-2(3)4/h1H3	(H2	3	4)	18	1	H5C2ON	1491.2031	-	308.5	158.19	CC(=O)N	10.87831	3.89183	54.21
ACEMID06	InChI=1S/C2H5NO/c1-2(3)4/h1H3	(H2	3	4)	16	2	H5C2ON	1384.2352	-	308.5	210.9	CC(=O)N	9.0455	4.02983	93.84
ACIGID	InChI=1S/C15H23N3O2S/c1-9(19)16-12-17-18(10(2)20)15(21-12)8-11-6-7-14(15	5)13(11	3)4/h11H	6-8H2	1-5H3	(H	16	17	19)/t11-	14-	15-/m1/s1	4	1	H23SC15O2N3	1606.7773	-	458	364.98	CC(=O)N[C]1[N]N([C@@]2(S1)C[C@@H]1C([C@@]2(C)CC1)(C)C)C(=O)C	10.0246	5.77649	108.59
ACIGID01	InChI=1S/C15H23N3O2S/c1-9(19)16-12-17-18(10(2)20)15(21-12)8-11-6-7-14(15	5)13(11	3)4/h11H	6-8H2	1-5H3	(H	16	17	19)/t11-	14-	15-/m0/s1	8	1	H23SC15O2N3	3226.7276	-	458	243.13	CC(=O)N[C]1[N]N([C@]2(S1)C[C@H]1C([C@]2(C)CC1)(C)C)C(=O)C	10.29185	4.6113	62.32
ACRDIN04	InChI=1S/C13H9N/c1-3-7-12-10(5-1)9-11-6-2-4-8-13(11)14-12/h1-9H	4	1	H9C13N	914.2466	-	370.3	516.92	c1ccc2c(c1)nc1c(c2)cccc1	9.79542	2.5977	258.06
ACRDIN06	InChI=1S/C13H9N/c1-3-7-12-10(5-1)9-11-6-2-4-8-13(11)14-12/h1-9H	8	2	H9C13N	1850.8257	-	370.3	563.32	c1ccc2c(c1)nc1c(c2)cccc1	9.51302	2.83565	282.50
ADURIA	InChI=1S/C12H12N2O2/c1-8-11(9(2)15)12(16)14(13-8)10-6-4-3-5-7-10/h3-7	16H	1-2H3	8	1	H12C12O2N2	2148.0983	-	402.4	500.21	CC(=O)c1c(C)nn(c1O)c1ccccc1	10.97611	3.72186	172.64
ADURIA01	InChI=1S/C12H12N2O2/c1-8-11(9(2)15)12(16)14(13-8)10-6-4-3-5-7-10/h3-7	16H	1-2H3	8	2	H12C12O2N2	2187.9358	-	402.4	516.23	CC(=O)c1c(C)nn(c1O)c1ccccc1	9.85494	3.25092	221.86
AGAKUP	InChI=1S/C14H9N3S/c18-14-16-10-6-2-1-5-9(10)13-15-11-7-3-4-8-12(11)17(13)14/h1-8H	(H	16	18)	8	1	H9SC14N3	2247.435	-	474.5	448.19	S=c1[nH]c2ccccc2c2n1c1ccccc1n2	11.84008	4.1855	117.60
AGAKUP01	InChI=1S/C14H9N3S/c18-14-16-10-6-2-1-5-9(10)13-15-11-7-3-4-8-12(11)17(13)14/h1-8H	(H	16	18)	4	1	H9C14SN3	1124.5055	-	474.5	517.41	S=c1[nH]c2ccccc2c2n1c1ccccc1n2	12.20099	4.20452	140.87
AHEMAB	InChI=1S/C4H4N2O2/c7-5-1-2-6(8)4-3-5/h1-4H	2	1	H4C4O2N2	246.1979	393	349.2	88.67	[O]n1ccn(cc1)[O]	12.96424	3.46687	22.83
AHEMAB01	InChI=1S/C4H4N2O2/c7-5-1-2-6(8)4-3-5/h1-4H	8	2	H4C4O2N2	989.483	393	349.2	211.79	[O]n1ccn(cc1)[O]	15.53205	4.41625	53.35
AJAPOR	InChI=1S/C3H6N8/c4-3-7-9-10-11(3)2-1-6-8-5/h1-2H2	(H2	4	7	10)	4	1	H6C3N8	706.5639	-	458.1	531.59	[N]=[N]=NCCn1nnnc1N	12.02905	7.41628	147.37
AJAPOR01	InChI=1S/C3H6N8/c4-3-7-9-10-11(3)2-1-6-8-5/h1-2H2	(H2	4	7	10)	2	1	H6C3N8	347.4847	-	458.1	540.85	[N]=[N]=NCCn1nnnc1N	12.44966	7.65435	158.88
AJETAL	InChI=1S/C14H11ClN2O2S/c1-10-2-4-11(5-3-10)20(18	19)17-9-7-12-13(15)6-8-16-14(12)17/h2-9H	1H3	8	1	H11C14N2SO2Cl	2697.6651	-	457.7	221.57	Cc1ccc(cc1)S(=O)(=O)n1ccc2c1nccc2Cl	9.96277	7.22946	57.44
AJETAL01	InChI=1S/C14H11ClN2O2S/c1-10-2-4-11(5-3-10)20(18	19)17-9-7-12-13(15)6-8-16-14(12)17/h2-9H	1H3	4	1	H11C14N2SO2Cl	1349.0905	-	457.7	447.27	Cc1ccc(cc1)S(=O)(=O)n1ccc2c1nccc2Cl	12.09163	8.518	111.85
AKOVOL01	InChI=1S/C5H5NS/c7-5-1-3-6-4-2-5/h1-4H	(H	6	7)	4	1	H5SC5N	501.2171	428	367.9	674.3544	S=c1cc[nH]cc1	13.06916	5.63953	236.94
AKOVOL02	InChI=1S/C5H5NS/c7-5-1-3-6-4-2-5/h1-4H	(H	6	7)	8	2	H5SC5N	1041.4938	428	367.9	471.2775	S=c1cc[nH]cc1	10.11142	4.45697	273.89
ALABUK	InChI=1S/C13H10N4/c1-3-7-14-10(5-1)12-9-13(17-16-12)11-6-2-4-8-15-11/h1-9H	(H	16	17)	4	1	H10C13N4	1094.3548	-	441.4	460.05	c1ccc(nc1)c1[nH]nc(c1)c1ccccn1	10.42407	3.21711	147.82
ALABUK02	InChI=1S/C13H10N4/c1-3-7-14-10(5-1)12-9-13(17-16-12)11-6-2-4-8-15-11/h1-9H	(H	16	17)	8	1	H10C13N4	2180.8283	-	441.4	414.62	c1ccc(nc1)c1[nH]nc(c1)c1ccccn1	10.93464	3.41791	131.09
AMBACO05	InChI=1S/C7H7NO2/c8-6-4-2-1-3-5(6)7(9)10/h1-4H	8H2	(H	9	10)	8	1	H7C7O2N	1357.3739	-	368	438.35	OC(=O)c1ccccc1N	8.72916	2.01929	229.27
AMBACO06	InChI=1S/C7H7NO2/c8-6-4-2-1-3-5(6)7(9)10/h1-4H	8H2	(H	9	10)	4	1	H7C7O2N	661.5325	-	368	493.35	OC(=O)c1ccccc1N	10.72151	3.28548	179.69
AMBNAC01	InChI=1S/C7H7NO2/c8-6-3-1-5(2-4-6)7(9)10/h1-4H	8H2	(H	9	10)	8	2	H7C7O2N	1337.8798	-	384.7	450.2618	OC(=O)c1ccc(cc1)N	10.25391	2.46531	191.16
AMBNAC04	InChI=1S/C7H7NO2/c8-6-3-1-5(2-4-6)7(9)10/h1-4H	8H2	(H	9	10)	4	1	H7C7O2N	649.9515	-	384.7	436.97	OC(=O)c1ccc(cc1)N	11.96792	5.42691	140.86
AMBZPH	InChI=1S/C13H12N2O/c14-11-5-1-9(2-6-11)13(16)10-3-7-12(15)8-4-10/h1-8H	14-15H2	3	1	H12C13ON2	818.0089	-	432.7	448.57	O=C(c1ccc(cc1)N)c1ccc(cc1)N	10.95736	6.43441	137.22
AMBZPH02	InChI=1S/C13H12N2O/c14-11-5-1-9(2-6-11)13(16)10-3-7-12(15)8-4-10/h1-8H	14-15H2	4	1	H12C13ON2	1109.0343	-	432.7	422.85	O=C(c1ccc(cc1)N)c1ccc(cc1)N	11.13561	4.18702	118.51
AMNTPY	InChI=1S/C5H5N3O2/c6-5-4(8(9)10)2-1-3-7-5/h1-3H	(H2	6	7)	4	1	H5C5O2N3	587.1881	438	376.8	704.79	O=N(=O)c1cccnc1N	13.71497	4.33475	222.15
AMNTPY01	InChI=1S/C5H5N3O2/c6-5-4(8(9)10)2-1-3-7-5/h1-3H	(H2	6	7)	4	1	H5C5O2N3	598.952	438	376.8	712.49	O=N(=O)c1cccnc1N	13.59586	4.49355	253.24
AMNTPY02	InChI=1S/C5H5N3O2/c6-5-4(8(9)10)2-1-3-7-5/h1-3H	(H2	6	7)	4	1	H5C5O2N3	598.9338	438	376.8	700.73	O=N(=O)c1cccnc1N	13.59311	4.49747	245.33
APUSAF	InChI=1S/C24H18O4/c25-21(17-7-3-1-4-8-17)15-23(27)19-11-13-20(14-12-19)24(28)16-22(26)18-9-5-2-6-10-18/h1-16	25-26H/b21-15-	22-16-	2	1	H18C24O4	900.1081	-	512.2	401.9	O=C(c1ccc(cc1)C(=O)/C=C(/c1ccccc1)\O)/C=C(/c1ccccc1)\O	12.7594	5.28737	97.10
APUSAF01	InChI=1S/C24H18O4/c25-21(17-7-3-1-4-8-17)15-23(27)19-11-13-20(14-12-19)24(28)16-22(26)18-9-5-2-6-10-18/h1-16	25-26H/b21-15-	22-16-	4	1	H18C24O4	1816.93	-	512.2	407.42	O=C(c1ccc(cc1)C(=O)/C=C(/c1ccccc1)\O)/C=C(/c1ccccc1)\O	9.83858	2.34457	148.53
ATAWIC	InChI=1S/C8H13NO4/c1-6(10)8(11)5-3-2-4-7(8)9(12)13/h7	11H	2-5H2	1H3/t7-	8-/m0/s1	4	1	H13C8O4N	905.8685	350	364.8	429.207	O=N(=O)[C@H]1CCCC[C@]1(O)C(=O)C	9.31535	5.0407	209.77
ATAWIC01	InChI=1S/C8H13NO4/c1-6(10)8(11)5-3-2-4-7(8)9(12)13/h7	11H	2-5H2	1H3/t7-	8-/m0/s1	4	2	H13C8O4N	894.4511	350	364.8	556.3866	O=N(=O)[C@H]1CCCC[C@]1(O)C(=O)C	11.39341	6.22058	303.04
ATCPEN	InChI=1S/C6H4N4/c7-2-1-6(10)5(3-8)4-9/h1	10H2	4	1	H4C6N4	642.5529	-	386	509.64	N#CCC(=C(C#N)C#N)N	13.31547	7.3937	171.89
ATCPEN01	InChI=1S/C6H4N4/c7-2-1-6(10)5(3-8)4-9/h1	10H2	2	1	H4C6N4	311.0152	-	386	500.42	N#CCC(=C(C#N)C#N)N	14.002	8.04679	153.98
AWELOE	InChI=1S/C10H11N3O2/c1-13-5-6-2-3-7(12-10(11)15)4-8(6)9(13)14/h2-4H	5H2	1H3	(H3	11	12	15)	4	1	H11C10O2N3	1034.3423	-	457.7	365.01	NC(=O)Nc1ccc2c(c1)C(=O)N(C2)C	9.50606	4.35076	117.70
AWELOE01	InChI=1S/C10H11N3O2/c1-13-5-6-2-3-7(12-10(11)15)4-8(6)9(13)14/h2-4H	5H2	1H3	(H3	11	12	15)	4	1	H11C10O2N3	1000.3588	-	457.7	394.18	NC(=O)Nc1ccc2c(c1)C(=O)N(C2)C	13.39254	6.85869	114.58
AWEWAB	InChI=1S/C14H13NO2/c16-10-12-8-4-5-9-13(12)15-14(17)11-6-2-1-3-7-11/h1-9	16H	10H2	(H	15	17)	4	1	H13C14O2N	1155.3971	-	435.2	446.43	OCc1ccccc1NC(=O)c1ccccc1	10.57991	5.50742	144.10
AWEWAB01	InChI=1S/C14H13NO2/c16-10-12-8-4-5-9-13(12)15-14(17)11-6-2-1-3-7-11/h1-9	16H	10H2	(H	15	17)	4	1	H13C14O2N	1190.9508	-	435.2	404.77	OCc1ccccc1NC(=O)c1ccccc1	9.8792	4.14714	139.75
AWUNOV	InChI=1S/C12H10N4O2/c17-11(15-9-5-1-3-7-13-9)12(18)16-10-6-2-4-8-14-10/h1-8H	(H	13	15	17)(H	14	16	18)	8	1	H10C12O2N4	2353.8914	-	455.2	384.95	O=C(C(=O)Nc1ccccn1)Nc1ccccn1	9.51652	5.18059	124.98
AWUNOV01	InChI=1S/C12H10N4O2/c17-11(15-9-5-1-3-7-13-9)12(18)16-10-6-2-4-8-14-10/h1-8H	(H	13	15	17)(H	14	16	18)	3	3	H10C12O2N4	877.591	-	455.2	521.02	O=C(C(=O)Nc1ccccn1)Nc1ccccn1	10.13349	4.3474	199.18
AXAJOZ	InChI=1S/C14H16N4O2S/c1-17-12(15)11(13(19)18(2)14(17)20)16-8-9-6-4-5-7-10(9)21-3/h4-8H	15H2	1-3H3/b16-8+	4	1	H16SC14O2N4	1426.8511	-	492.2	444.73	CSc1ccccc1/C=N/c1c(N)n(C)c(=O)n(c1=O)C	12.27217	4.55532	102.71
AXAJOZ01	InChI=1S/C14H16N4O2S/c1-17-12(15)11(13(19)18(2)14(17)20)16-8-9-6-4-5-7-10(9)21-3/h4-8H	15H2	1-3H3/b16-8+	4	1	H16SC14O2N4	1438.042	-	492.2	440.74	CSc1ccccc1/C=N/c1c(N)n(C)c(=O)n(c1=O)C	13.83819	5.40924	94.30
AXUCEC	InChI=1S/C8H5F/c1-2-7-4-3-5-8(9)6-7/h1	3-6H	12	3	H5C8F	1821.5601	-	281.9	511.71	C#Cc1cccc(c1)F	9.06799	3.07254	357.45
AXUCEC01	InChI=1S/C8H5F/c1-2-7-4-3-5-8(9)6-7/h1	3-6H	2	1	H5C8F	294.4318	-	281.9	501.28	C#Cc1cccc(c1)F	9.72916	3.28925	295.64
AYOVUG	InChI=1S/C15H13NO2S/c1-2-18-12-8-5-6-10(14(12)17)15-16-11-7-3-4-9-13(11)19-15/h3-9	17H	2H2	1H3	4	1	H13SC15O2N	1272.2306	-	445.3	434.54	CCOc1cccc(c1O)c1nc2c(s1)cccc2	11.03638	3.30993	134.22
AYOVUG01	InChI=1S/C15H13NO2S/c1-2-18-12-8-5-6-10(14(12)17)15-16-11-7-3-4-9-13(11)19-15/h3-9	17H	2H2	1H3	4	1	H13C15SO2N	1318.3264	-	445.3	404.76	CCOc1cccc(c1O)c1nc2c(s1)cccc2	9.04909	2.74183	154.89
AZERIH	InChI=1S/C15H17NO2S/c1-11-6-4-9-14(10-11)19(17	18)16-15-12(2)7-5-8-13(15)3/h4-10	16H	1-3H3	4	1	H17SC15O2N	1409.8233	-	445.8	403.92	Cc1cccc(c1)S(=O)(=O)Nc1c(C)cccc1C	10.908	5.85629	118.54
AZERIH01	InChI=1S/C15H17NO2S/c1-11-6-4-9-14(10-11)19(17	18)16-15-12(2)7-5-8-13(15)3/h4-10	16H	1-3H3	2	1	H17SC15O2N	710.8644	-	445.8	381.93	Cc1cccc(c1)S(=O)(=O)Nc1c(C)cccc1C	10.58949	4.07686	113.71
AZERON	InChI=1S/C13H11Cl2NO2S/c1-9-4-2-5-10(8-9)19(17	18)16-13-11(14)6-3-7-12(13)15/h2-8	16H	1H3	4	1	H11C13NSO2Cl2	1391.8001	-	455	416.29	Cc1cccc(c1)S(=O)(=O)Nc1c(Cl)cccc1Cl	11.65244	5.50887	105.25
AZERON01	InChI=1S/C13H11Cl2NO2S/c1-9-4-2-5-10(8-9)19(17	18)16-13-11(14)6-3-7-12(13)15/h2-8	16H	1H3	2	1	H11C13NSO2Cl2	688.0842	-	455	436.13	Cc1cccc(c1)S(=O)(=O)Nc1c(Cl)cccc1Cl	12.00966	8.11395	109.99
AZIBYR02	InChI=1S/C8H12N4/c1-7(2	5-9)11-12-8(3	4)6-10/h1-4H3/b12-11+	2	1	H12C8N4	454.4216	-	343.5	407.13	N#CC(/N=N/C(C#N)(C)C)(C)C	9.21065	6.30357	193.36
AZIBYR03	InChI=1S/C8H12N4/c1-7(2	5-9)11-12-8(3	4)6-10/h1-4H3/b12-11+	1	1	H12C8N4	225.8615	-	343.5	418.53	N#CC(/N=N/C(C#N)(C)C)(C)C	9.7873	6.48204	202.74
AZSTBA	InChI=1S/C12H10N2/c1-3-9-13-11(5-1)7-8-12-6-2-4-10-14-12/h1-10H/b8-7+	4	1	H10C12N2	964.2771	-	372.7	405.74	c1ccc(nc1)/C=C/c1ccccn1	9.41745	3.15866	161.62
AZSTBA01	InChI=1S/C12H10N2/c1-3-9-13-11(5-1)7-8-12-6-2-4-10-14-12/h1-10H/b8-7+	2	1	H10C12N2	479.021	-	372.7	505.26	c1ccc(nc1)/C=C/c1ccccn1	10.30511	3.08334	204.51
BAGFIY	InChI=1S/C6H8N2/c7-5-3-1-2-4-6(5)8/h1-4H	7-8H2	4	1	H8C6N2	599.6886	-	334.3	85.49	Nc1ccccc1N	9.90429	4.24592	27.32
BAGFIY01	InChI=1S/C6H8N2/c7-5-3-1-2-4-6(5)8/h1-4H	7-8H2	8	1	H8C6N2	1209.54	-	334.3	488.34	Nc1ccccc1N	9.87976	4.13242	234.72
BAHNUU	InChI=1S/C8H4S6/c1-2-4-6-5(3-1)7-8(9-6)11-13-14-12-10-7/h1-4H	4	1	H4S6C8	1102.6788	400	445.5	445.87	S1SSc2c(SS1)c1c(s2)cccc1	11.14044	4.33224	125.45
BAHNUU01	InChI=1S/C8H4S6/c1-2-4-6-5(3-1)7-8(9-6)11-13-14-12-10-7/h1-4H	4	1	H4S6C8	1078.6464	400	445.5	407.15	S1SSc2c(SS1)c1c(s2)cccc1	11.37262	5.62795	111.58
BAPLOT02	InChI=1S/C7H8N4O2/c1-10-5-4(8-3-9-5)6(12)11(2)7(10)13/h3H	1-2H3	(H	8	9)	8	2	H8C7O2N4	1593.0969	549	447.1	620.06	Cn1c(=O)n(C)c2c(c1=O)[nH]cn2	12.32998	5.27198	239.52
BAPLOT04	InChI=1S/C7H8N4O2/c1-10-5-4(8-3-9-5)6(12)11(2)7(10)13/h3H	1-2H3	(H	8	9)	4	1	H8C7O2N4	820.3206	549	447.1	403.73	Cn1c(=O)n(C)c2c(c1=O)[nH]cn2	12.17677	4.30797	117.11
BAPLOT06	InChI=1S/C7H8N4O2/c1-10-5-4(8-3-9-5)6(12)11(2)7(10)13/h3H	1-2H3	(H	8	9)	4	1	H8C7O2N4	818.421	549	447.1	526.77	Cn1c(=O)n(C)c2c(c1=O)[nH]cn2	12.64095	5.57274	135.16
BAQBEA	InChI=1S/C15H11N3S3/c1-3-7-11(8-4-1)13-17-15-18-14(20-21(15)19-13)16-12-9-5-2-6-10-12/h1-10H	(H	16	17	18)/t21-/m1/s1	8	1	H11S3C15N3	3043.1116	462	470.1	362.5	c1ccc(cc1)NC1=[S][S@]2=[S]C(=NC2=N1)c1ccccc1	10.41312	3.95469	108.21
BAQBEA01	InChI=1S/C15H11N3S3/c1-3-7-11(8-4-1)13-17-15-18-14(20-21(15)19-13)16-12-9-5-2-6-10-12/h1-10H	(H	16	17	18)/t21-/m0/s1	4	2	H11S3C15N3	1505.2123	462	470.1	403.22	c1ccc(cc1)NC1=[S][S@@]2=[S]C(=NC2=N1)c1ccccc1	10.24933	3.92466	129.44
BAQHOS	InChI=1S/C9H13NO2/c1-3-9(4-2)7(11)5-6-10-8(9)12/h5-6H	3-4H2	1-2H3	(H	10	12)	8	2	H13C9O2N	1845.5031	363	389.6	445.99	CCC1(CC)C(=O)NC=CC1=O	9.74031	5.23915	206.98
BAQHOS02	InChI=1S/C9H13NO2/c1-3-9(4-2)7(11)5-6-10-8(9)12/h5-6H	3-4H2	1-2H3	(H	10	12)	4	1	H13C9O2N	924.5412	363	389.6	466.77	CCC1(CC)C(=O)NC=CC1=O	10.47091	5.97726	189.38
BARBAC01	InChI=1S/C4H4N2O3/c7-2-1-3(8)6-4(9)5-2/h1H2	(H2	5	6	7	8	9)	4	1	H4C4O3N2	556.1744	-	439.6	554.61	O=C1CC(=O)NC(=O)N1	13.59013	6.08466	138.50
BARBAC02	InChI=1S/C4H4N2O3/c7-2-1-3(8)6-4(9)5-2/h1H2	(H2	5	6	7	8	9)	8	2	H4C4O3N2	1038.3366	-	439.6	791.04	O=C1CC(=O)NC(=O)N1	15.0715	6.33943	208.63
BAWNIW	InChI=1S/C8Cl4N2/c9-5-3(1-13)6(10)8(12)7(11)4(5)2-14	4	1	C8Cl4N2	963.5214	-	396.3	339.59	N#Cc1c(Cl)c(C#N)c(c(c1Cl)Cl)Cl	9.36339	3.52958	146.64
BAWNIW02	InChI=1S/C8Cl4N2/c9-5-3(1-13)6(10)8(12)7(11)4(5)2-14	6	3	C8Cl4N2	1443.4999	-	396.3	548.98	N#Cc1c(Cl)c(C#N)c(c(c1Cl)Cl)Cl	10.21346	4.21017	243.69
BCOCAN01	InChI=1S/C18H12O3/c19-17-15-13-9-5-1-2-6-10(9)14(16(15)18(20)21-17)12-8-4-3-7-11(12)13/h1-8	13-16H/t13-	14+	15-	16+	4	1	H12C18O3	1311.3277	534	421.3	562.05	O=C1OC(=O)[C@H]2[C@@H]1[C@@H]1c3c([C@H]2c2c1cccc2)cccc3	11.04631	6.6263	238.90
BCOCAN03	InChI=1S/C18H12O3/c19-17-15-13-9-5-1-2-6-10(9)14(16(15)18(20)21-17)12-8-4-3-7-11(12)13/h1-8	13-16H/t13-	14+	15-	16+	4	1	H12C18O3	1336.0763	534	421.3	546.28	O=C1OC(=O)[C@H]2[C@@H]1[C@@H]1c3c([C@H]2c2c1cccc2)cccc3	10.84924	5.77239	201.38
BEBMAX	InChI=1S/C18H14N2O5/c1-23-17(21)13-7-3-11(4-8-13)15-19-20-16(25-15)12-5-9-14(10-6-12)18(22)24-2/h3-10H	1-2H3	4	1	H14C18O5N2	1547.1836	-	489.1	400.95	COC(=O)c1ccc(cc1)c1nnc(o1)c1ccc(cc1)C(=O)OC	14.75258	5.14129	85.91
BEBMAX01	InChI=1S/C18H14N2O5/c1-23-17(21)13-7-3-11(4-8-13)15-19-20-16(25-15)12-5-9-14(10-6-12)18(22)24-2/h3-10H	1-2H3	4	1	H14C18O5N2	1553.0328	-	489.1	417.64	COC(=O)c1ccc(cc1)c1nnc(o1)c1ccc(cc1)C(=O)OC	13.76605	5.14757	78.94
BECDAO	InChI=1S/C10H15NO/c1-5-9-6(2)10(8(4)12)11-7(9)3/h11H	5H2	1-4H3	8	1	H15C10ON	1985.5	-	363.3	359.52	CCc1c(C)[nH]c(c1C)C(=O)C	8.32109	3.08004	192.63
BECDAO01	InChI=1S/C10H15NO/c1-5-9-6(2)10(8(4)12)11-7(9)3/h11H	5H2	1-4H3	4	1	H15C10ON	951.4161	-	363.3	413.56	CCc1c(C)[nH]c(c1C)C(=O)C	9.53031	4.22722	183.93
BELBUP	InChI=1S/C5H4N4O/c10-9-5-4(7-8-9)2-1-3-6-5/h1-3	10H	8	1	H4C5ON4	1166.9047	480	379.9	635.44	On1nnc2c1nccc2	11.56619	4.79324	268.39
BELBUP02	InChI=1S/C5H4N4O/c10-9-5-4(7-8-9)2-1-3-6-5/h1-3	10H	4	1	H4C5ON4	574.9947	480	379.9	664.25	On1nnc2c1nccc2	13.0014	4.7451	244.05
BELBUP03	InChI=1S/C5H4N4O/c10-9-5-4(7-8-9)2-1-3-6-5/h1-3	10H	4	1	H4C5ON4	570.2823	480	379.9	606.83	On1nnc2c1nccc2	10.74886	5.18956	258.72
BERPAP	InChI=1S/C15H17N3O7/c1-3-24-13(20)9-12(19)14(15(21)25-4-2)17-16-10-5-7-11(8-6-10)18(22)23/h5-8	16H	3-4	9H2	1-2H3/b17-14-	2	1	H17C15O7N3	843.6974	383	456.9	307.09	CCOC(=O)/C(=N\Nc1ccc(cc1)N(=O)=O)/C(=O)CC(=O)OCC	10.88915	6.92762	79.60
BERPAP01	InChI=1S/C15H17N3O7/c1-3-24-13(20)9-12(19)14(15(21)25-4-2)17-16-10-5-7-11(8-6-10)18(22)23/h5-8	16H	3-4	9H2	1-2H3/b17-14-	4	1	H17C15O7N3	1689.1996	383	456.9	280.8	CCOC(=O)/C(=N\Nc1ccc(cc1)N(=O)=O)/C(=O)CC(=O)OCC	10.74502	6.67677	72.91
BERTOH	InChI=1S/C7H6N2/c8-5-6-1-3-7(9)4-2-6/h1-4H	9H2	4	1	H6C7N2	615.3892	-	341.8	478.41	N#Cc1ccc(cc1)N	8.8925	2.90042	243.48
BERTOH01	InChI=1S/C7H6N2/c8-5-6-1-3-7(9)4-2-6/h1-4H	9H2	4	1	H6C7N2	628.4696	-	341.8	501.56	N#Cc1ccc(cc1)N	9.15799	3.58479	256.24
BEYZIO	InChI=1S/C9H8NO3S/c11-14(12	13)8-5-1-3-7-4-2-6-10-9(7)8/h1-4	6	10H	5H2	2	1	H7SC9O3N	424.1664	-	459.6	543.07	[O]S(=O)(=O)C1=c2[nH]cccc2C=CC1	13.48125	6.44624	123.77
BEYZIO01	InChI=1S/C9H8NO3S/c11-14(12	13)8-5-1-3-7-4-2-6-10-9(7)8/h1-4	6	10H	5H2	4	1	H7SC9O3N	849.6673	-	459.6	527.58	[O]S(=O)(=O)C1=c2[nH]cccc2C=CC1	13.6309	5.89031	115.43
BIDLOP	InChI=1S/C7H6O3/c8-6-3-1-2-5(4-6)7(9)10/h1-4	8H	(H	9	10)	4	1	H6C7O3	629.4095	-	373	493.16	Oc1cccc(c1)C(=O)O	11.60129	4.6885	175.30
BIDLOP01	InChI=1S/C7H6O3/c8-6-3-1-2-5(4-6)7(9)10/h1-4	8H	(H	9	10)	4	1	H6C7O3	629.1873	-	373	474.56	Oc1cccc(c1)C(=O)O	12.81233	5.75033	168.32
BIRFEN	InChI=1S/C12H18S6/c1-13-7-8(14-2)10(16-4)12(18-6)11(17-5)9(7)15-3/h1-6H3	2	1	H18S6C12	799.3973	-	464.5	382.14	CSc1c(SC)c(SC)c(c(c1SC)SC)SC	11.98214	6.13338	92.02
BIRFEN01	InChI=1S/C12H18S6/c1-13-7-8(14-2)10(16-4)12(18-6)11(17-5)9(7)15-3/h1-6H3	1	1	H18S6C12	404.2859	-	464.5	394.95	CSc1c(SC)c(SC)c(c(c1SC)SC)SC	12.65774	5.74598	89.33
BISMEV	InChI=1S/C6H10N2O2/c7-5(9)4-8-3-1-2-6(8)10/h1-4H2	(H2	7	9)	2	1	H10C6O2N2	346.9748	411	410.2	515.96	NC(=O)CN1CCCC1=O	12.50974	6.38126	153.27
BISMEV03	InChI=1S/C6H10N2O2/c7-5(9)4-8-3-1-2-6(8)10/h1-4H2	(H2	7	9)	4	1	H10C6O2N2	738.4077	411	410.2	569.85	NC(=O)CN1CCCC1=O	12.02378	5.90397	171.68
BIVLAT	InChI=1S/C10H4N2O2S/c13-9-5-3-1-2-4-6(5)10(14)8-7(9)11-15-12-8/h1-4H	8	2	H4SC10O2N2	1732.3945	-	427.6	665.11	O=C1c2ccccc2C(=O)c2c1nsn2	13.51877	4.59801	190.09
BIVLAT01	InChI=1S/C10H4N2O2S/c13-9-5-3-1-2-4-6(5)10(14)8-7(9)11-15-12-8/h1-4H	4	1	H4C10SO2N2	863.1423	-	427.6	436.37	O=C1c2ccccc2C(=O)c2c1nsn2	13.771	5.05492	112.71
BNZQUI	InChI=1S/C6H4O2/c7-5-1-2-6(8)4-3-5/h1-4H	2	1	H4C6O2	265.2259	-	306.5	87.93	O=C1C=CC(=O)C=C1	11.64177	2.66717	30.13
BNZQUI03	InChI=1S/C6H4O2/c7-5-1-2-6(8)4-3-5/h1-4H	2	1	H4C6O2	265.2796	-	306.5	87.99	O=C1C=CC(=O)C=C1	11.66073	2.63763	30.16
BOHZOO	InChI=1S/C9H11N3OS2/c1-2-15-9(14)12-11-8(13)7-4-3-5-10-6-7/h3-6H	2H2	1H3	(H	11	13)(H	12	14)	8	1	H11S2C9ON3	2170.2628	-	467.8	211.91	CCSC(=S)NNC(=O)c1cccnc1	14.40563	5.14221	41.32
BOHZOO01	InChI=1S/C9H11N3OS2/c1-2-15-9(14)12-11-8(13)7-4-3-5-10-6-7/h3-6H	2H2	1H3	(H	11	13)(H	12	14)	1	1	H11S2C9ON3	274.0386	-	467.8	417.39	CCSC(=S)NNC(=O)c1cccnc1	14.36339	7.09451	96.12
BPHENO03	InChI=1S/C13H10O/c14-13(11-7-3-1-4-8-11)12-9-5-2-6-10-12/h1-10H	8	1	H10C13O	1950.386	298	353.5	198.61	O=C(c1ccccc1)c1ccccc1	9.95238	4.70405	66.76
BPHENO12	InChI=1S/C13H10O/c14-13(11-7-3-1-4-8-11)12-9-5-2-6-10-12/h1-10H	4	1	H10C13O	973.8857	298	353.5	388.96	O=C(c1ccccc1)c1ccccc1	9.85645	3.98171	155.08
BPROMA01	InChI=1S/C14H21NO/c1-11-10-15(3)12(2)9-14(11	16)13-7-5-4-6-8-13/h4-8	11-12	16H	9-10H2	1-3H3/t11-	12+	14-/m0/s1	18	1	H21C14ON	5851.7782	377.5	378.3	232.72	C[C@H]1CN(C)[C@@H](C[C@@]1(O)c1ccccc1)C	7.71901	4.42158	107.00
BPROMA10	InChI=1S/C14H21NO/c1-11-10-15(3)12(2)9-14(11	16)13-7-5-4-6-8-13/h4-8	11-12	16H	9-10H2	1-3H3/t11-	12+	14-/m1/s1	4	1	H21C14ON	1286.512	377.5	378.3	335.21	C[C@@H]1CN(C)[C@H](C[C@]1(O)c1ccccc1)C	9.05461	4.32569	142.74
BUVKEJ	InChI=1S/C10H14N2O6/c13-7(14)3-1-5-9(17)12-6(10(18)11-5)2-4-8(15)16/h5-6H	1-4H2	(H	11	18)(H	12	17)(H	13	14)(H	15	16)/t5-	6-/m0/s1	2	1	H14C10O6N2	576.6334	-	529.9	344.85	OC(=O)CC[C@@H]1NC(=O)[C@@H](NC1=O)CCC(=O)O	19.28415	13.35782	77.18
BUVKEJ01	InChI=1S/C10H14N2O6/c13-7(14)3-1-5-9(17)12-6(10(18)11-5)2-4-8(15)16/h5-6H	1-4H2	(H	11	18)(H	12	17)(H	13	14)(H	15	16)/t5-	6-/m0/s1	2	1	H14C10O6N2	571.2368	-	529.9	452.63	OC(=O)CC[C@@H]1NC(=O)[C@@H](NC1=O)CCC(=O)O	28.71874	17.66795	74.85
BZDMAZ02	InChI=1S/C7H6N2/c1-2-4-7-6(3-1)8-5-9-7/h1-5H	(H	8	9)	4	1	H6C7N2	643.7222	431.5	368.4	39.82	c1ccc2c(c1)[nH]cn2	6.96735	4.52204	18.91
BZDMAZ03	InChI=1S/C7H6N2/c1-2-4-7-6(3-1)8-5-9-7/h1-5H	(H	8	9)	8	1	H6C7N2	1228.9293	431.5	368.4	80.53	c1ccc2c(c1)[nH]cn2	10.07074	3.66697	25.14
BZTRAZ	InChI=1S/C6H5N3/c1-2-4-6-5(3-1)7-9-8-6/h1-4H	(H	7	8	9)	8	4	H5C6N3	1186.9703	372	363.1	454.57	c1ccc2c(c1)[nH]nn2	8.5463	3.12006	268.87
BZTRAZ01	InChI=1S/C6H5N3/c1-2-4-6-5(3-1)7-9-8-6/h1-4H	(H	7	8	9)	10	5	H5C6N3	1464.0906	372	363.1	441.91	c1ccc2c(c1)[nH]nn2	8.84441	3.04881	203.80
BZTZAD	InChI=1S/C8H7N3O2/c12-8(13)5-11-9-6-3-1-2-4-7(6)10-11/h1-4H	5H2	(H	12	13)	4	1	H7C8O2N3	811.9885	-	409.4	503.28	OC(=O)Cn1nc2c(n1)cccc2	11.3671	5.35065	164.60
BZTZAD01	InChI=1S/C8H7N3O2/c12-8(13)5-11-9-6-3-1-2-4-7(6)10-11/h1-4H	5H2	(H	12	13)	8	1	H7C8O2N3	1671.621	-	409.4	437.31	OC(=O)Cn1nc2c(n1)cccc2	10.62686	5.98564	141.92
CABTUV	InChI=1S/C18H16/c1-2-6-14-10-17(9-13(14)5-1)18-11-15-7-3-4-8-16(15)12-18/h1-8H	9-12H2	2	1	H16C18	635.5102	-	396.5	419.22	c1ccc2c(c1)C/C(=C/1\Cc3c(C1)cccc3)/C2	9.54945	3.63959	164.50
CABTUV01	InChI=1S/C18H16/c1-2-6-14-10-17(9-13(14)5-1)18-11-15-7-3-4-8-16(15)12-18/h1-8H	9-12H2	2	1	H14C18	623.401	-	396.5	466.07	c1ccc2c(c1)C/C(=C/1\Cc3c(C1)cccc3)/C2	9.42301	3.3127	386.85
CACBAK	InChI=1S/C12H12O2/c1-10(13)9-12(14)8-7-11-5-3-2-4-6-11/h2-9	14H	1H3/b8-7+	12-9-	8	1	H12C12O2	2002.7721	356	364.9	451.19	CC(=O)/C=C(/C=C/c1ccccc1)\O	10.15904	2.9567	177.81
CACBAK01	InChI=1S/C12H12O2/c1-10(13)9-12(14)8-7-11-5-3-2-4-6-11/h2-9	14H	1H3/b8-7-	12-9-	8	2	H12C12O2	2009.1984	356	364.9	426.04	CC(=O)/C=C(/C=C\c1ccccc1)\O	10.48497	3.41879	174.97
CACDAM	InChI=1S/C7H6O4/c8-5-3-1-2-4(6(5)9)7(10)11/h1-3	8-9H	(H	10	11)	4	2	H6C7O4	663.257	-	383.8	518.1706	OC(=O)c1cccc(c1O)O	12.53149	5.64467	222.36
CACDAM01	InChI=1S/C7H6O4/c8-5-3-1-2-4(6(5)9)7(10)11/h1-3	8-9H	(H	10	11)	4	1	H6C7O4	641.7582	-	383.8	601.66	OC(=O)c1cccc(c1O)O	13.29159	5.70098	200.82
CARBTC	InChI=1S/CCl4/c2-1(3	4)5	4	1	CCl4	516.4237	250	235.8	69.75	ClC(Cl)(Cl)Cl	6.84553	3.62889	45.89
CARBTC07	InChI=1S/CCl4/c2-1(3	4)5	32	4	CCl4	4215.9875	250	235.8	249.56	ClC(Cl)(Cl)Cl	6.71044	3.49646	199.64
CARWID	InChI=1S/C14H10N2O2/c17-12-8-4-2-6-10(12)13-15-11-7-3-1-5-9(11)14(18)16-13/h1-8	17H	(H	15	16	18)	4	1	H10C14O2N2	1130.5949	-	466.6	499.57	Oc1ccccc1c1nc2ccccc2c(=O)[nH]1	10.67951	3.56444	156.96
CARWID01	InChI=1S/C14H10N2O2/c17-12-8-4-2-6-10(12)13-15-11-7-3-1-5-9(11)14(18)16-13/h1-8	17H	(H	15	16	18)	8	1	H10C14O2N2	2252.206	-	466.6	437.57	Oc1ccccc1c1nc2ccccc2c(=O)[nH]1	9.70955	4.29221	157.17
CASHOT02	InChI=1S/C3H5NS2/c5-3-4-1-2-6-3/h1-2H2	(H	4	5)	8	2	H5S2C3N	979.1595	-	360	552.83	S=C1NCCS1	10.80195	4.63224	204.96
CASHOT03	InChI=1S/C3H5NS2/c5-3-4-1-2-6-3/h1-2H2	(H	4	5)	2	1	H5S2C3N	249.9409	-	360	515.49	S=C1NCCS1	9.96089	4.84217	241.91
CAWDUZ	InChI=1S/C14H10O2/c1-2-12-8-6-10-9(5-7(8)11(1)15-12)13-3-4-14(10)16-13/h1-6	11-14H/t11-	12+	13-	14+	4	1	H10C14O2	1005.8504	518	380.3	52.3	C1=C[C@H]2O[C@@H]1c1c2cc2c(c1)[C@@H]1C=C[C@H]2O1	10.01137	5.90907	14.29
CAWDUZ01	InChI=1S/C14H10O2/c1-2-12-8-6-10-9(5-7(8)11(1)15-12)13-3-4-14(10)16-13/h1-6	11-14H/t11-	12+	13-	14+	2	1	H10C14O2	506.4201	518	380.3	59.08	C1=C[C@H]2O[C@@H]1c1c2cc2c(c1)[C@@H]1C=C[C@H]2O1	10.27526	4.27139	16.07
CEBGOF01	InChI=1S/C8H8O3/c1-11-8(10)6-2-4-7(9)5-3-6/h2-5	9H	1H3	12	3	H8C8O3	2211.7175	-	349.6	627.28	COC(=O)c1ccc(cc1)O	10.81355	4.58228	313.49
CEBGOF03	InChI=1S/C8H8O3/c1-11-8(10)6-2-4-7(9)5-3-6/h2-5	9H	1H3	4	1	H8C8O3	739.9899	-	349.6	500.22	COC(=O)c1ccc(cc1)O	11.58119	2.96004	209.34
CEBKEZ	InChI=1S/C15H16N2O/c1-17(2)14-9-7-13(8-10-14)16-11-12-5-3-4-6-15(12)18/h3-11	18H	1-2H3/b16-11+	8	1	H16C15ON2	2544.9044	-	408.2	433.29	Oc1ccccc1/C=N/c1ccc(cc1)N(C)C	10.32715	2.9123	153.19
CEBKEZ01	InChI=1S/C15H16N2O/c1-17(2)14-9-7-13(8-10-14)16-11-12-5-3-4-6-15(12)18/h3-11	18H	1-2H3/b16-11+	4	1	H16C15ON2	1289.5992	-	408.2	426.35	Oc1ccccc1/C=N/c1ccc(cc1)N(C)C	9.47033	2.80418	162.60
CELHIL	InChI=1S/C24H24N2O2/c27-23(25-17-15-19-7-3-1-4-8-19)21-11-13-22(14-12-21)24(28)26-18-16-20-9-5-2-6-10-20/h1-14H	15-18H2	(H	25	27)(H	26	28)	1	1	H24C24O2N2	496.1471	544	552.1	367.94	O=C(c1ccc(cc1)C(=O)NCCc1ccccc1)NCCc1ccccc1	13.53953	5.57833	71.92
CELHIL01	InChI=1S/C24H24N2O2/c27-23(25-17-15-19-7-3-1-4-8-19)21-11-13-22(14-12-21)24(28)26-18-16-20-9-5-2-6-10-20/h1-14H	15-18H2	(H	25	27)(H	26	28)	2	1	H24C24O2N2	1001.809	544	552.1	380.67	O=C(c1ccc(cc1)C(=O)NCCc1ccccc1)NCCc1ccccc1	13.50049	6.44937	77.25
CIDXUI	InChI=1S/C14H11N3/c1-2-4-11-10(3-1)13-12(17-11)6-5-9-7-15-8-16-14(9)13/h1-4	7-8	17H	5-6H2	4	1	H11C14N3	1143.0813	-	437.4	378.83	c1ncc2c(n1)c1c(CC2)[nH]c2c1cccc2	10.6717	2.88004	120.25
CIDXUI01	InChI=1S/C14H11N3/c1-2-4-11-10(3-1)13-12(17-11)6-5-9-7-15-8-16-14(9)13/h1-4	7-8	17H	5-6H2	8	1	H11C14N3	2326.2387	-	437.4	390.16	c1ncc2c(n1)c1c(CC2)[nH]c2c1cccc2	11.27092	4.14568	142.95
CIKDIK	InChI=1S/C20H14O2S/c21-17-11-9-13-5-1-3-7-15(13)19(17)23-20-16-8-4-2-6-14(16)10-12-18(20)22/h1-12	21-22H	4	1	H14SC20O2	1521.6326	-	483.9	415.69	Oc1ccc2c(c1Sc1c(O)ccc3c1cccc3)cccc2	10.46414	5.83382	124.10
CIKDIK01	InChI=1S/C20H14O2S/c21-17-11-9-13-5-1-3-7-15(13)19(17)23-20-16-8-4-2-6-14(16)10-12-18(20)22/h1-12	21-22H	4	1	H14SC20O2	1499.236	-	483.9	392.73	Oc1ccc2c(c1Sc1c(O)ccc3c1cccc3)cccc2	10.97697	5.21681	107.39
CINMAC06	InChI=1S/C9H8O2/c10-9(11)7-6-8-4-2-1-3-5-8/h1-7H	(H	10	11)/b7-6+	4	1	H8C9O2	754.9157	-	358.7	466.71	OC(=O)/C=C/c1ccccc1	10.21917	3.07189	224.25
CINMAC07	InChI=1S/C9H8O2/c10-9(11)7-6-8-4-2-1-3-5-8/h1-7H	(H	10	11)/b7-6+	4	1	H8C9O2	760.1653	-	358.7	455.58	OC(=O)/C=C/c1ccccc1	9.18908	2.89575	206.55
CIZDUK01	InChI=1S/C18H15N3/c1-3-9-15(10-4-1)18(17-13-7-8-14-19-17)21-20-16-11-5-2-6-12-16/h1-14	20H/b21-18+	4	1	H15C18N3	1455.3051	418	423.7	378.86	c1ccc(cc1)N/N=C(/c1ccccn1)\c1ccccc1	10.12778	4.72012	125.27
CIZDUK02	InChI=1S/C18H15N3/c1-3-9-15(10-4-1)18(17-13-7-8-14-19-17)21-20-16-11-5-2-6-12-16/h1-14	20H/b21-18+	4	1	H15C18N3	1449.8456	418	423.7	384.75	c1ccc(cc1)N/N=C(/c1ccccn1)\c1ccccc1	9.74523	5.7362	133.65
CLACET01	InChI=1S/C2H3ClO2/c3-1-2(4)5/h1H2	(H	4	5)	8	2	H3C2O2Cl	762.9148	332	299.4	673.12	OC(=O)CCl	9.60155	4.92627	536.71
CLACET02	InChI=1S/C2H3ClO2/c3-1-2(4)5/h1H2	(H	4	5)	4	1	H3C2O2Cl	378.3299	332	299.4	631.06	OC(=O)CCl	9.68578	4.99397	378.13
CLPHOL12	InChI=1S/C6H5ClO/c7-5-1-3-6(8)4-2-5/h1-4	8H	8	2	H5C6OCl	1201.6592	316	382.9	163.93	Oc1ccc(cc1)Cl	9.36786	2.60031	51.28
CLPHOL13	InChI=1S/C6H5ClO/c7-5-1-3-6(8)4-2-5/h1-4	8H	8	2	H5C6OCl	1196.9189	316	382.9	143.45	Oc1ccc(cc1)Cl	8.61024	2.40111	48.84
COBBIE04	InChI=1S/C14H8O2/c15-13-5-6-14(16)12-8-10-4-2-1-3-9(10)7-11(12)13/h1-8H	4	1	H8C14O2	967.546	-	407.6	527.52	O=C1C=CC(=O)c2c1cc1ccccc1c2	13.0437	3.72393	155.07
COBBIE05	InChI=1S/C14H8O2/c15-13-5-6-14(16)12-8-10-4-2-1-3-9(10)7-11(12)13/h1-8H	4	1	H8C14O2	969.0016	-	407.6	534.65	O=C1C=CC(=O)c2c1cc1ccccc1c2	13.07956	3.09142	156.35
CORDCP	InChI=1S/C10H13N5O3/c11-8-7-9(13-3-12-8)15(4-14-7)10-6(17)1-5(2-16)18-10/h3-6	10	16-17H	1-2H2	(H2	11	12	13)/t5-	6+	10+/m0/s1	2	1	H13C10O3N5	591.4333	-	489.8	310.53	OC[C@@H]1C[C@H]([C@@H](O1)n1cnc2c1ncnc2N)O	15.15163	9.17798	72.07
CORDCP01	InChI=1S/C10H13N5O3/c11-8-7-9(13-3-12-8)15(4-14-7)10-6(17)1-5(2-16)18-10/h3-6	10	16-17H	1-2H2	(H2	11	12	13)/t5-	6+	10+/m0/s1	4	1	H13C10O3N5	1170.3941	-	489.8	247.1	OC[C@@H]1C[C@H]([C@@H](O1)n1cnc2c1ncnc2N)O	15.03717	10.88652	51.68
COXDHN	InChI=1S/C10H4Cl4O/c11-7-8(15)5-3-1-2-4-6(5)10(13	14)9(7)12/h1-4H	4	1	H4C10OCl4	1084.8984	-	377.6	482.01	O=C1C(=C(Cl)C(c2c1cccc2)(Cl)Cl)Cl	10.6005	5.51576	186.77
COXDHN01	InChI=1S/C10H4Cl4O/c11-7-8(15)5-3-1-2-4-6(5)10(13	14)9(7)12/h1-4H	8	2	H4C10OCl4	2146.0865	-	377.6	508.83	O=C1C(=C(Cl)C(c2c1cccc2)(Cl)Cl)Cl	9.82119	4.18397	239.03
COYMOS	InChI=1S/C10H11N3O2/c11-8(14)10(9(12)15)6-13(10)7-4-2-1-3-5-7/h1-5H	6H2	(H2	11	14)(H2	12	15)	4	1	H11C10O2N3	1031.0027	-	443.7	420.41	NC(=O)C1(CN1c1ccccc1)C(=O)N	12.11227	7.89124	109.91
COYMOS01	InChI=1S/C10H11N3O2/c11-8(14)10(9(12)15)6-13(10)7-4-2-1-3-5-7/h1-5H	6H2	(H2	11	14)(H2	12	15)	4	1	H11C10O2N3	1014.8811	-	443.7	433.15	NC(=O)C1(CN1c1ccccc1)C(=O)N	10.47334	6.81816	144.89
CUCKOA	InChI=1S/C11H17NO3/c13-8-4-3-6-11-5-1-2-7-12(11)10(14)15-9(8)11/h8-9	13H	1-7H2/t8-	9-	11+/m0/s1	4	1	H17C11O3N	1061.936	385	395.4	324.7	O[C@H]1CCC[C@@]23[C@H]1OC(=O)N3CCCC2	9.28158	4.32901	144.85
CUCKOA01	InChI=1S/C11H17NO3/c13-8-4-3-6-11-5-1-2-7-12(11)10(14)15-9(8)11/h8-9	13H	1-7H2/t8-	9-	11+/m0/s1	4	1	H17C11O3N	1124.6407	385	395.4	341.89	O[C@H]1CCC[C@@]23[C@H]1OC(=O)N3CCCC2	8.92413	4.14651	141.27
CUKCAM01	InChI=1S/C7H4N2O6/c10-7(11)4-1-5(8(12)13)3-6(2-4)9(14)15/h1-3H	(H	10	11)	4	1	H4C7O6N2	851.6076	485.5	415.6	535.22	OC(=O)c1cc(cc(c1)N(=O)=O)N(=O)=O	12.81959	5.14704	169.11
CUKCAM02	InChI=1S/C7H4N2O6/c10-7(11)4-1-5(8(12)13)3-6(2-4)9(14)15/h1-3H	(H	10	11)	8	1	H4C7O6N2	1672.885	485.5	415.6	557.95	OC(=O)c1cc(cc(c1)N(=O)=O)N(=O)=O	13.18022	5.22309	162.53
CUMMIG01	InChI=1S/C6H8/c1-2-5(1)6-3-4-6/h1-4H2	2	1	H8C6	257.8421	-	237.3	99.55	C1CC1=C1CC1	6.23605	2.72944	72.10
CUMMIG02	InChI=1S/C6H8/c1-2-5(1)6-3-4-6/h1-4H2	2	1	H8C6	263.6307	-	237.3	99.04	C1CC1=C1CC1	6.37074	3.22668	86.10
CUNKAY	InChI=1S/C15H16N2O2/c1-9-7-10(2)13(11(3)8-9)17-14-12(15(18)19)5-4-6-16-14/h4-8H	1-3H3	(H	16	17)(H	18	19)	8	2	H16C15O2N2	2771.9163	-	438.7	359.1	Cc1cc(C)c(c(c1)C)Nc1ncccc1C(=O)O	9.50658	5.58852	130.81
CUNKAY02	InChI=1S/C15H16N2O2/c1-9-7-10(2)13(11(3)8-9)17-14-12(15(18)19)5-4-6-16-14/h4-8H	1-3H3	(H	16	17)(H	18	19)	4	1	H16C15O2N2	1402.3039	-	438.7	391.32	Cc1cc(C)c(c(c1)C)Nc1ncccc1C(=O)O	10.64246	5.27779	125.35
CYVTPA	InChI=1S/C23H14N4/c24-15-19(16-25)23(17-26)18-11-13-22(14-12-18)27(20-7-3-1-4-8-20)21-9-5-2-6-10-21/h1-14H	8	1	H14C23N4	3713.6186	447.5	491.1	325.21	N#CC(=C(C#N)C#N)c1ccc(cc1)N(c1ccccc1)c1ccccc1	9.97129	4.01746	88.69
CYVTPA01	InChI=1S/C23H14N4/c24-15-19(16-25)23(17-26)18-11-13-22(14-12-18)27(20-7-3-1-4-8-20)21-9-5-2-6-10-21/h1-14H	8	1	H14C23N4	3552.1833	447.5	491.1	352.3	N#CC(=C(C#N)C#N)c1ccc(cc1)N(c1ccccc1)c1ccccc1	9.83664	5.51667	107.05
DADDER	InChI=1S/C15H10O2/c16-15-13-9-5-4-8-12(13)14(17-15)10-11-6-2-1-3-7-11/h1-10H/b14-10+	8	2	H10C15O2	2243.9762	364	400	470.89	O=C1O/C(=C/c2ccccc2)/c2c1cccc2	10.42886	2.76558	176.09
DADDER01	InChI=1S/C15H10O2/c16-15-13-9-5-4-8-12(13)14(17-15)10-11-6-2-1-3-7-11/h1-10H/b14-10-	2	1	H10C15O2	552.1166	364	400	455.18	O=C1O/C(=C\c2ccccc2)/c2c1cccc2	9.86251	2.88691	210.82
DAFBIV	InChI=1S/C4H6N2O2S/c7-6(8)3-4-5-1-2-9-4/h3	5H	1-2H2/b4-3-	8	1	H6SC4O2N2	1289.5497	-	374.4	585.2	O=N(=O)/C=C\1/NCCS1	11.59315	4.86153	225.89
DAFBIV01	InChI=1S/C4H6N2O2S/c7-6(8)3-4-5-1-2-9-4/h3	5H	1-2H2/b4-3-	8	2	H6SC4O2N2	1238.6493	-	374.4	643.1	O=N(=O)/C=C\1/NCCS1	10.13559	4.41749	417.06
DAKFUQ	InChI=1S/C10H8OS3/c1-11-8-4-2-7(3-5-8)9-6-10(12)14-13-9/h2-6H	1H3	4	1	H8S3C10O	1025.966	-	429.3	487.51	COc1ccc(cc1)c1ssc(=S)c1	12.6002	3.58539	128.26
DAKFUQ01	InChI=1S/C10H8OS3/c1-11-8-4-2-7(3-5-8)9-6-10(12)14-13-9/h2-6H	1H3	8	1	H8S3C10O	2058.9991	-	429.3	467.76	COc1ccc(cc1)C1=[S]SC(=S)[CH]1	12.9976	4.78969	122.34
DAMPEO	InChI=1S/C13H12N2O2/c1-9-4-6-10(7-5-9)15-12-11(13(16)17)3-2-8-14-12/h2-8H	1H3	(H	14	15)(H	16	17)	4	1	H12C13O2N2	1190.508	-	423.7	363.74	Cc1ccc(cc1)Nc1ncccc1C(=O)O	9.76229	4.5403	135.94
DAMPEO01	InChI=1S/C13H12N2O2/c1-9-4-6-10(7-5-9)15-12-11(13(16)17)3-2-8-14-12/h2-8H	1H3	(H	14	15)(H	16	17)	8	1	H12C13O2N2	2354.9497	-	423.7	371.83	Cc1ccc(cc1)Nc1ncccc1C(=O)O	9.49836	5.11293	147.23
DAVVUR	InChI=1S/C26H28O4/c1-13-9-15-19-20(24(28)29-21(15)17(11-13)25(3	4)5)16-10-14(2)12-18(26(6	7)8)22(16)30-23(19)27/h9-12H	1-8H3	1	1	H28C26O4	516.9576	-	502.7	380.64	Cc1cc(c2c(c1)c1c(=O)oc3c(c1c(=O)o2)cc(cc3C(C)(C)C)C)C(C)(C)C	12.06588	6.23469	89.87
DAVVUR01	InChI=1S/C26H28O4/c1-13-9-15-19-20(24(28)29-21(15)17(11-13)25(3	4)5)16-10-14(2)12-18(26(6	7)8)22(16)30-23(19)27/h9-12H	1-8H3	1	1	H28C26O4	511.4722	-	502.7	347.9	Cc1cc(c2c(c1)c1c(=O)oc3c(c1c(=O)o2)cc(cc3C(C)(C)C)C)C(C)(C)C	11.55579	6.30224	96.99
DAWBEI	InChI=1S/C26H28O6/c1-25(2	3)17-11-13(29-7)9-15-19(23(27)31-21(15)17)20-16-10-14(30-8)12-18(26(4	5)6)22(16)32-24(20)28/h9-12H	1-8H3/b20-19+	2	1	H28C26O6	1120.2689	-	512.7	365.55	COc1cc(c2c(c1)/C(=C/1\C(=O)Oc3c1cc(OC)cc3C(C)(C)C)/C(=O)O2)C(C)(C)C	10.63703	4.75087	96.13
DAWBEI01	InChI=1S/C26H28O6/c1-25(2	3)17-11-13(29-7)9-15-19(23(27)31-21(15)17)20-16-10-14(30-8)12-18(26(4	5)6)22(16)32-24(20)28/h9-12H	1-8H3/b20-19+	4	1	H28C26O6	2294.7802	-	512.7	364.98	COc1cc(c2c(c1)/C(=C/1\C(=O)Oc3c1cc(OC)cc3C(C)(C)C)/C(=O)O2)C(C)(C)C	11.04885	4.02091	92.94
DAXSOM	InChI=1S/C29H34O/c1-19-9-13-21(14-10-19)26(22-15-11-20(2)12-16-22)23-17-24(28(3	4)5)27(30)25(18-23)29(6	7)8/h9-18H	1-8H3	4	1	H34C29O	2551.6118	-	463.1	240.58	Cc1ccc(cc1)[C](c1ccc(cc1)C)[C]1C=C(C(=O)C(=C1)C(C)(C)C)C(C)(C)C	6.07786	3.63134	127.14
DAXSOM01	InChI=1S/C29H34O/c1-19-9-13-21(14-10-19)26(22-15-11-20(2)12-16-22)23-17-24(28(3	4)5)27(30)25(18-23)29(6	7)8/h9-18H	1-8H3	8	1	H34C29O	5081.6397	-	463.1	286.83	Cc1ccc(cc1)[C](c1ccc(cc1)C)[C]1C=C(C(=O)C(=C1)C(C)(C)C)C(C)(C)C	7.35973	3.82604	118.76
DAXTIH01	InChI=1S/C23H22O/c1-15-5-9-19(10-6-15)22(20-11-7-16(2)8-12-20)21-13-17(3)23(24)18(4)14-21/h5-14H	1-4H3	2	1	H22C23O	911.8758	-	447.3	311.68	CC1=C[C](C=C(C1=O)C)[C](c1ccc(cc1)C)c1ccc(cc1)C	9.34544	5.32475	108.59
DAXTIH02	InChI=1S/C23H22O/c1-15-5-9-19(10-6-15)22(20-11-7-16(2)8-12-20)21-13-17(3)23(24)18(4)14-21/h5-14H	1-4H3	4	1	H22C23O	1811.5496	-	447.3	338.68	CC1=C[C](C=C(C1=O)C)[C](c1ccc(cc1)C)c1ccc(cc1)C	11.3494	5.98135	93.59
DBXZCP	InChI=1S/C19H20N2O2/c1-3-8-18-16(6-1)14-20-10-5-11-21-15-17-7-2-4-9-19(17)23-13-12-22-18/h1-4	6-9	14-15H	5	10-13H2/b20-14+	21-15+	4	1	H20C19O2N2	1620.7337	473	446.3	407.89	C1CC/N=C/c2ccccc2OCCOc2c(/C=N/1)cccc2	10.58713	5.10561	128.76
DBXZCP01	InChI=1S/C19H20N2O2/c1-3-8-18-16(6-1)14-20-10-5-11-21-15-17-7-2-4-9-19(17)23-13-12-22-18/h1-4	6-9	14-15H	5	10-13H2/b20-14+	21-15+	2	1	H20C19O2N2	818.3502	473	446.3	399.73	C1CC/N=C/c2ccccc2OCCOc2c(/C=N/1)cccc2	9.94019	4.04641	140.29
DCDHNQ	InChI=1S/C10H4Cl2O4/c11-7-8(12)10(16)6-4(14)2-1-3(13)5(6)9(7)15/h1-2	13-14H	4	1	H4C10O4Cl2	966.1521	-	415.7	544.56	O=C1C(=C(Cl)C(=O)c2c1c(O)ccc2O)Cl	11.47771	4.11491	184.98
DCDHNQ01	InChI=1S/C10H4Cl2O4/c11-7-8(12)10(16)6-4(14)2-1-3(13)5(6)9(7)15/h1-2	13-14H	4	1	H4C10O4Cl2	964.9771	-	415.7	546.91	O=C1C(=C(Cl)C(=O)c2c1c(O)ccc2O)Cl	11.52988	3.78769	179.99
DCHXCS01	InChI=1S/C20H36O6/c1-2-6-18-17(5-1)23-13-9-21-11-15-25-19-7-3-4-8-20(19)26-16-12-22-10-14-24-18/h17-20H	1-16H2/t17-	18+	19-	20+	2	1	H36C20O6	1014.9947	-	446.7	361.49	O1CCO[C@@H]2CCCC[C@@H]2OCCOCCO[C@@H]2[C@H](OCC1)CCCC2	10.27376	5.92244	108.14
DCHXCS02	InChI=1S/C20H36O6/c1-2-6-18-17(5-1)23-13-9-21-11-15-25-19-7-3-4-8-20(19)26-16-12-22-10-14-24-18/h17-20H	1-16H2/t17-	18+	19-	20+	4	1	H36C20O6	1997.2185	-	446.7	356.17	O1CCO[C@@H]2CCCC[C@@H]2OCCOCCO[C@@H]2[C@H](OCC1)CCCC2	9.8907	3.70947	112.92
DCLANT01	InChI=1S/C14H8Cl2/c15-13-9-5-1-2-6-10(9)14(16)12-8-4-3-7-11(12)13/h1-8H	2	2	H8C14Cl2	535.0848	-	398.6	90.37	Clc1c2ccccc2c(c2c1cccc2)Cl	10.91369	3.38989	24.28
DCLANT10	InChI=1S/C14H8Cl2/c15-13-9-5-1-2-6-10(9)14(16)12-8-4-3-7-11(12)13/h1-8H	4	1	H8C14Cl2	1059.0869	-	398.6	53.1	Clc1c2ccccc2c(c2c1cccc2)Cl	11.7696	4.00607	12.44
DEFDUN	InChI=1S/C6H3ClN2O4/c7-4-1-2-5(8(10)11)6(3-4)9(12)13/h1-3H	4	1	H3C6ClO4N2	813.09	311	373.1	367.83	Clc1ccc(c(c1)N(=O)=O)N(=O)=O	10.2079	4.60658	129.36
DEFDUN01	InChI=1S/C6H3ClN2O4/c7-4-1-2-5(8(10)11)6(3-4)9(12)13/h1-3H	4	1	H3C6ClO4N2	776.2945	311	373.1	465.62	Clc1ccc(c(c1)N(=O)=O)N(=O)=O	11.67523	5.65939	143.18
DEFQIP	InChI=1S/C13H12N2O3/c1-2-18-13(17)10-8-14-11(12(16)15-10)9-6-4-3-5-7-9/h3-8H	2H2	1H3	(H	15	16)	4	1	H12C13O3N2	1154.2178	-	448	464.28	CCOC(=O)c1cnc(c(=O)[nH]1)c1ccccc1	10.99692	4.44835	140.41
DEFQIP01	InChI=1S/C13H12N2O3/c1-2-18-13(17)10-8-14-11(12(16)15-10)9-6-4-3-5-7-9/h3-8H	2H2	1H3	(H	15	16)	4	1	H12C13O3N2	1189.7747	-	448	452.14	CCOC(=O)c1cnc(c(=O)[nH]1)c1ccccc1	10.30073	3.82528	140.68
DESKER	InChI=1S/C4H2Cl2N2O/c5-2-1-7-8-4(9)3(2)6/h1H	(H	8	9)	4	1	H2C4Cl2ON2	616.1941	-	388.7	501.99	Clc1c(Cl)cn[nH]c1=O	11.68003	3.86907	184.72
DESKER01	InChI=1S/C4H2Cl2N2O/c5-2-1-7-8-4(9)3(2)6/h1H	(H	8	9)	4	1	H2C4Cl2ON2	603.8644	-	388.7	551.01	Clc1c(Cl)cn[nH]c1=O	11.53055	5.06832	212.81
DETBAA01	InChI=1S/C8H12N2O3/c1-3-8(4-2)5(11)9-7(13)10-6(8)12/h3-4H2	1-2H3	(H2	9	10	11	12	13)	18	1	H12C8O3N2	4299.7857	456	446.7	489.5	CCC1(CC)C(=O)NC(=O)NC1=O	11.28644	7.70328	162.41
DETBAA03	InChI=1S/C8H12N2O3/c1-3-8(4-2)5(11)9-7(13)10-6(8)12/h3-4H2	1-2H3	(H2	9	10	11	12	13)	8	4	H12C8O3N2	1850.8317	456	446.7	526.46	CCC1(CC)C(=O)NC(=O)NC1=O	11.13157	4.74161	252.38
DETBAA04	InChI=1S/C8H12N2O3/c1-3-8(4-2)5(11)9-7(13)10-6(8)12/h3-4H2	1-2H3	(H2	9	10	11	12	13)	4	1	H12C8O3N2	982.0307	456	446.7	449.67	CCC1(CC)C(=O)NC(=O)NC1=O	11.55663	5.26454	146.63
DETSUQ	InChI=1S/C19H18O8/c1-23-10-7-11(20)15-12(8-10)27-18(19(26-4)17(15)22)9-5-13(24-2)16(21)14(6-9)25-3/h5-8	20-21H	1-4H3	2	1	H18C19O8	871.2912	457.5	495.9	330.83	COc1cc(O)c2c(c1)oc(c(c2=O)OC)c1cc(OC)c(c(c1)OC)O	12.99559	6.31309	76.99
DETSUQ01	InChI=1S/C19H18O8/c1-23-10-7-11(20)15-12(8-10)27-18(19(26-4)17(15)22)9-5-13(24-2)16(21)14(6-9)25-3/h5-8	20-21H	1-4H3	4	1	H18C19O8	1722.7636	457.5	495.9	291.33	COc1cc(O)c2c(c1)oc(c(c2=O)OC)c1cc(OC)c(c(c1)OC)O	10.71217	5.16291	75.15
DEWVOQ	InChI=1S/C14H18O4/c1-7-8(2)12-10(9(3)11(7)15)5-6-14(4	18-12)13(16)17/h15H	5-6H2	1-4H3	(H	16	17)/t14-/m1/s1	2	1	H18C14O4	637.0762	-	436	365.31	Cc1c2O[C@](C)(CCc2c(c(c1C)O)C)C(=O)O	11.07804	7.16373	118.16
DEWVOQ01	InChI=1S/C14H18O4/c1-7-8(2)12-10(9(3)11(7)15)5-6-14(4	18-12)13(16)17/h15H	5-6H2	1-4H3	(H	16	17)/t14-/m1/s1	4	1	H18C14O4	1250.7116	-	436	420.96	Cc1c2O[C@](C)(CCc2c(c(c1C)O)C)C(=O)O	11.51274	7.24872	115.99
DHANQU01	InChI=1S/C14H8O4/c15-9-5-1-3-7-11(9)14(18)12-8(13(7)17)4-2-6-10(12)16/h1-6	15-16H	4	1	H8C14O4	1043.8396	-	424.6	546.85	Oc1cccc2c1C(=O)c1c(C2=O)cccc1O	11.81285	3.67082	161.42
DHANQU04	InChI=1S/C14H8O4/c15-9-5-1-3-7-11(9)14(18)12-8(13(7)17)4-2-6-10(12)16/h1-6	15-16H	8	2	H8C14O4	2084.4862	-	424.6	527.27	Oc1cccc2c1C(=O)c1c(C2=O)cccc1O	10.53077	2.78334	199.04
DHANQU06	InChI=1S/C14H8O4/c15-9-5-1-3-7-11(9)14(18)12-8(13(7)17)4-2-6-10(12)16/h1-6	15-16H	4	1	H8C14O4	1055.1257	-	424.6	520.46	Oc1cccc2c1C(=O)c1c(C2=O)cccc1O	11.19427	2.74569	183.45
DIKHAH	InChI=1S/C17H17NO2/c1-2-3-4-7-13-20-17(19)18-16-12-8-10-14-9-5-6-11-15(14)16/h2-12H	13H2	1H3	(H	18	19)/b3-2+	7-4+	4	1	H17C17O2N	1471.3822	372	432.8	320.75	C/C=C/C=C/COC(=O)Nc1cccc2c1cccc2	10.61284	5.0405	93.41
DIKHAH01	InChI=1S/C17H17NO2/c1-2-3-4-7-13-20-17(19)18-16-12-8-10-14-9-5-6-11-15(14)16/h2-12H	13H2	1H3	(H	18	19)/b3-2+	7-4+	2	1	H17C17O2N	732.759	372	432.8	320.05	C/C=C/C=C/COC(=O)Nc1cccc2c1cccc2	9.50166	4.54147	111.07
DIKVID	InChI=1S/C18H18Cl4N2O2/c19-13-5-11(17(25)15(21)7-13)9-23-1-2-24(4-3-23)10-12-6-14(20)8-16(22)18(12)26/h5-8	25-26H	1-4	9-10H2	2	1	H18C18Cl4O2N2	964.8848	511	490.8	345.77	Clc1cc(CN2CCN(CC2)Cc2cc(Cl)cc(c2O)Cl)c(c(c1)Cl)O	9.51965	5.09029	120.07
DIKVID01	InChI=1S/C18H18Cl4N2O2/c19-13-5-11(17(25)15(21)7-13)9-23-1-2-24(4-3-23)10-12-6-14(20)8-16(22)18(12)26/h5-8	25-26H	1-4	9-10H2	4	1	H18C18Cl4O2N2	1961.9403	511	490.8	364.29	Clc1cc(CN2CCN(CC2)Cc2cc(Cl)cc(c2O)Cl)c(c(c1)Cl)O	10.70636	5.25099	102.82
DIUREA04	InChI=1S/C4H6N4O2/c9-3-5-1-2(7-3)8-4(10)6-1/h1-2H	(H2	5	7	9)(H2	6	8	10)/t1-	2+	4	1	H6C4O2N4	625.8393	-	450.9	348.77	O=C1N[C@@H]2[C@H](N1)NC(=O)N2	12.96809	5.4268	105.72
DIUREA05	InChI=1S/C4H6N4O2/c9-3-5-1-2(7-3)8-4(10)6-1/h1-2H	(H2	5	7	9)(H2	6	8	10)/t1-	2+	4	1	H6C4O2N4	621.6094	-	450.9	455.17	O=C1N[C@@H]2[C@H](N1)NC(=O)N2	14.01913	5.19108	95.29
DLMAND02	InChI=1S/C8H8O3/c9-7(8(10)11)6-4-2-1-3-5-6/h1-5	7	9H	(H	10	11)/t7-/m1/s1	8	2	H8C8O3	1471.7857	-	371.3	478.38	O[C@H](c1ccccc1)C(=O)O	11.62973	8.3052	176.34
DLMAND03	InChI=1S/C8H8O3/c9-7(8(10)11)6-4-2-1-3-5-6/h1-5	7	9H	(H	10	11)/t7-/m1/s1	8	1	H8C8O3	1551.8545	-	371.3	391.14	O[C@H](c1ccccc1)C(=O)O	9.40261	5.13915	160.51
DMADEN10	InChI=1S/C7H9N5/c1-8-6-5-7(10-3-9-6)12(2)4-11-5/h3-4H	1-2H3	(H	8	9	10)	8	2	H9C7N5	1609.8443	-	393.2	565.28	CNc1ncnc2c1ncn2C	10.47248	3.27086	223.70
DMADEN11	InChI=1S/C7H9N5/c1-8-6-5-7(10-3-9-6)12(2)4-11-5/h3-4H	1-2H3	(H	8	9	10)	4	1	H9C7N5	800.751	-	393.2	416.74	CNc1ncnc2c1ncn2C	9.43064	4.57146	192.85
DMBZAC	InChI=1S/C9H10O2/c1-6-4-3-5-8(7(6)2)9(10)11/h3-5H	1-2H3	(H	10	11)	2	1	H10C9O2	380.5311	-	363.4	484.69	OC(=O)c1cccc(c1C)C	10.97791	3.98644	208.10
DMBZAC01	InChI=1S/C9H10O2/c1-6-4-3-5-8(7(6)2)9(10)11/h3-5H	1-2H3	(H	10	11)	2	1	H10C9O2	383.2783	-	363.4	465.13	OC(=O)c1cccc(c1C)C	10.08578	4.02481	223.65
DMFUSC01	InChI=1S/C21H18O/c1-15-13-19(14-16(2)21(15)22)20(17-9-5-3-6-10-17)18-11-7-4-8-12-18/h3-14H	1-2H3	4	1	H18C21O	1557.2469	-	430.6	411.94	CC1=C[C](C=C(C1=O)C)[C](c1ccccc1)c1ccccc1	10.61422	4.65137	126.16
DMFUSC02	InChI=1S/C21H18O/c1-15-13-19(14-16(2)21(15)22)20(17-9-5-3-6-10-17)18-11-7-4-8-12-18/h3-14H	1-2H3	4	1	H18C21O	1562.437	-	430.6	399.31	CC1=C[C](C=C(C1=O)C)[C](c1ccccc1)c1ccccc1	11.03532	5.97528	125.38
DMNPYO	InChI=1S/C7H9N2O3/c1-5-3-8(10)4-6(2)7(5)9(11)12/h3-4	7H	1-2H3	4	1	H8C7O3N2	743.8193	-	389	618.18	[O]N1C=C(C)[C@H](C(=C1)C)N(=O)=O	13.2719	6.95653	178.10
DMNPYO01	InChI=1S/C7H9N2O3/c1-5-3-8(10)4-6(2)7(5)9(11)12/h3-4	7H	1-2H3	8	1	H8C7O3N2	1507.7561	-	389	606.45	[O]N1C=C(C)[C@H](C(=C1)C)N(=O)=O	12.81441	5.21455	184.84
DODDAB01	InChI=1S/C18H18N4O/c1-12-9-10-16(13(2)11-12)19-20-17-14(3)21-22(18(17)23)15-7-5-4-6-8-15/h4-11	19H	1-3H3/b20-17-	4	1	H18C18ON4	1604.2031	-	464.7	415.35	Cc1ccc(c(c1)C)N/N=C\1/C(=NN(C1=O)c1ccccc1)C	10.52066	3.02465	128.07
DODDAB02	InChI=1S/C18H18N4O/c1-12-9-10-16(13(2)11-12)19-20-17-14(3)21-22(18(17)23)15-7-5-4-6-8-15/h4-11	19H	1-3H3/b20-17-	8	1	H18C18ON4	3169.5967	-	464.7	436.25	Cc1ccc(c(c1)C)N/N=C\1/C(=NN(C1=O)c1ccccc1)C	10.47927	3.31087	128.36
DOPDAN	InChI=1S/C9H11N3O2/c1-6(13)10-8-4-3-5-9(12-8)11-7(2)14/h3-5H	1-2H3	(H2	10	11	12	13	14)	8	1	H11C9O2N3	1920.726	478	436.8	433.44	CC(=O)Nc1cccc(n1)NC(=O)C	11.47208	5.57999	145.98
DOPDAN01	InChI=1S/C9H11N3O2/c1-6(13)10-8-4-3-5-9(12-8)11-7(2)14/h3-5H	1-2H3	(H2	10	11	12	13	14)	4	1	H11C9O2N3	977.136	478	436.8	548.8	CC(=O)Nc1cccc(n1)NC(=O)C	12.16849	5.25331	160.76
DPGUAN	InChI=1S/C13H13N3/c14-13(15-11-7-3-1-4-8-11)16-12-9-5-2-6-10-12/h1-10H	(H3	14	15	16)	8	2	H13C13N3	2340.1188	-	402.3	427.45	N/C(=N\c1ccccc1)/Nc1ccccc1	9.43157	5.54734	176.49
DPGUAN03	InChI=1S/C13H13N3/c14-13(15-11-7-3-1-4-8-11)16-12-9-5-2-6-10-12/h1-10H	(H3	14	15	16)	8	2	H13C13N3	2349.216	-	402.3	396.59	N/C(=N\c1ccccc1)/Nc1ccccc1	8.81194	3.67792	172.13
DPIPDS	InChI=1S/C10H20N2S2/c1-3-7-11(8-4-1)13-14-12-9-5-2-6-10-12/h1-10H2	4	1	H20S2C10N2	1231.9637	-	382.2	440.06	C1CCN(CC1)SSN1CCCCC1	9.88562	4.96764	180.77
DPIPDS01	InChI=1S/C10H20N2S2/c1-3-7-11(8-4-1)13-14-12-9-5-2-6-10-12/h1-10H2	4	1	H20C10S2N2	1227.6627	-	382.2	425.61	C1CCN(CC1)SSN1CCCCC1	9.63389	4.90745	169.56
DPYRAM	InChI=1S/C10H9N3/c1-3-7-11-9(5-1)13-10-6-2-4-8-12-10/h1-8H	(H	11	12	13)	8	1	H9C10N3	1755.8736	370	373.6	364.18	c1ccc(nc1)Nc1ccccn1	8.61361	3.62788	179.95
DPYRAM01	InChI=1S/C10H9N3/c1-3-7-11-9(5-1)13-10-6-2-4-8-12-10/h1-8H	(H	11	12	13)	4	2	H9C10N3	894.6817	370	373.6	390.35	c1ccc(nc1)Nc1ccccn1	8.6147	3.12826	188.42
DPYRAM02	InChI=1S/C10H9N3/c1-3-7-11-9(5-1)13-10-6-2-4-8-12-10/h1-8H	(H	11	12	13)	8	2	H9C10N3	1801.2573	370	373.6	447.46	c1ccc(nc1)Nc1ccccn1	9.81673	4.32895	184.90
DTBPTR	InChI=1S/C22H28S/c1-19(2	3)22(20(4	5)6)21(23-22	17-13-9-7-10-14-17)18-15-11-8-12-16-18/h7-16H	1-6H3	4	1	H28C22S	1878.3905	381	414.9	375.83	CC(C1(S[C@@]1(c1ccccc1)c1ccccc1)C(C)(C)C)(C)C	10.04608	3.57658	134.36
DTBPTR01	InChI=1S/C22H28S/c1-19(2	3)22(20(4	5)6)21(23-22	17-13-9-7-10-14-17)18-15-11-8-12-16-18/h7-16H	1-6H3	4	1	H28C22S	1856.0374	381	414.9	360.32	CC(C1(S[C@@]1(c1ccccc1)c1ccccc1)C(C)(C)C)(C)C	10.35255	4.84459	118.13
DUDNAS	InChI=1S/C15H11NO3/c1-19-13-9-5-4-8-12(13)16-14(17)10-6-2-3-7-11(10)15(16)18/h2-9H	1H3	4	1	H11C15O3N	1223.0605	-	444.3	487.97	COc1ccccc1N1C(=O)c2c(C1=O)cccc2	10.1523	4.71447	169.27
DUDNAS01	InChI=1S/C15H11NO3/c1-19-13-9-5-4-8-12(13)16-14(17)10-6-2-3-7-11(10)15(16)18/h2-9H	1H3	8	1	H11C15O3N	2484.966	-	444.3	446.06	COc1ccccc1N1C(=O)c2c(C1=O)cccc2	10.43871	4.17193	151.84
DUDZIL	InChI=1S/C13H10N2O3/c14-12-7-6-10(15(17)18)8-11(12)13(16)9-4-2-1-3-5-9/h1-8H	14H2	4	1	H10C13O3N2	1114.1607	-	436.7	473.42	Nc1ccc(cc1C(=O)c1ccccc1)N(=O)=O	12.00276	5.7707	148.81
DUDZIL01	InChI=1S/C13H10N2O3/c14-12-7-6-10(15(17)18)8-11(12)13(16)9-4-2-1-3-5-9/h1-8H	14H2	4	1	H10C13O3N2	1123.6091	-	436.7	491.13	Nc1ccc(cc1C(=O)c1ccccc1)N(=O)=O	10.86282	5.15821	158.43
DUNWOZ	InChI=1S/C19H18Cl2O4/c20-15-7-3-1-5-13(15)17-22-9-19(10-23-17)11-24-18(25-12-19)14-6-2-4-8-16(14)21/h1-8	17-18H	9-12H2/t17-	18-	19-/m0/s1	4	1	H18C19O4Cl2	1786.6598	419	458.4	307.47	Clc1ccccc1[C@@H]1OC[C@]2(CO1)CO[C@H](OC2)c1ccccc1Cl	10.53107	6.92945	88.09
DUNWOZ01	InChI=1S/C19H18Cl2O4/c20-15-7-3-1-5-13(15)17-22-9-19(10-23-17)11-24-18(25-12-19)14-6-2-4-8-16(14)21/h1-8	17-18H	9-12H2/t17-	18-	19-/m1/s1	4	1	H18C19O4Cl2	1764.3723	419	458.4	335.36	Clc1ccccc1[C@@H]1OC[C@]2(CO1)CO[C@@H](OC2)c1ccccc1Cl	10.16617	6.39464	93.14
EBIRIR	InChI=1S/C16H16N6/c17-21-19-15-9-5-13(6-10-15)3-1-2-4-14-7-11-16(12-8-14)20-22-18/h5-12H	1-4H2	2	1	H16C16N6	786.6722	327	520.1	245.17	[N]=[N]=Nc1ccc(cc1)CCCCc1ccc(cc1)N=[N]=[N]	8.44622	3.04207	72.79
EBIRIR01	InChI=1S/C16H16N6/c17-21-19-15-9-5-13(6-10-15)3-1-2-4-14-7-11-16(12-8-14)20-22-18/h5-12H	1-4H2	4	1	H16C16N6	1523.0754	327	520.1	279	[N]=[N]=Nc1ccc(cc1)CCCCc1ccc(cc1)N=[N]=[N]	10.06801	3.85283	74.46
EFUMAU	InChI=1S/C4H9N/c1-2-4-5-3-1/h5H	1-4H2	4	1	H9C4N	447.4798	210	257.7	427.27	C1CCCN1	8.07125	4.43473	351.18
EFUMAU03	InChI=1S/C4H9N/c1-2-4-5-3-1/h5H	1-4H2	4	2	H9C4N	456.8641	210	257.7	349.73	C1CCCN1	6.87057	3.3165	384.12
EFURIH	InChI=1S/C6H12O6/c7-1-2(8)4(10)6(12)5(11)3(1)9/h1-12H/t1-	2-	3+	4+	5-	6-	2	1	H12C6O6	372.0104	-	449.7	509.31	O[C@@H]1[C@@H](O)[C@H](O)[C@H]([C@@H]([C@H]1O)O)O	19.40566	12.49848	78.01
EFURIH04	InChI=1S/C6H12O6/c7-1-2(8)4(10)6(12)5(11)3(1)9/h1-12H/t1-	2-	3+	4+	5-	6-	2	2	H12C6O6	388.4106	-	449.7	538.92	O[C@@H]1[C@@H](O)[C@H](O)[C@H]([C@@H]([C@H]1O)O)O	21.15375	11.68028	76.40
EHOWIH	InChI=1S/C6H6N2O/c7-6(9)5-1-3-8-4-2-5/h1-4H	(H2	7	9)	4	1	H6C6ON2	592.4178	431	385.6	491.65	NC(=O)c1ccncc1	12.73477	5.00275	171.39
EHOWIH02	InChI=1S/C6H6N2O/c7-6(9)5-1-3-8-4-2-5/h1-4H	(H2	7	9)	8	2	H6C6ON2	1224.3623	431	385.6	704.32	NC(=O)c1ccncc1	13.73166	5.80064	285.64
EMAMEL	InChI=1S/C8H13NO2S/c1-7(2)6(10)11-8(3	4)5(12)9-7/h1-4H3	(H	9	12)	4	1	H13SC8O2N	917.6995	447.5	402.6	501.62	O=C1OC(C)(C)C(=S)NC1(C)C	11.01877	5.53062	165.85
EMAMEL01	InChI=1S/C8H13NO2S/c1-7(2)6(10)11-8(3	4)5(12)9-7/h1-4H3	(H	9	12)	4	2	H13SC8O2N	914.3549	447.5	402.6	532.56	O=C1OC(C)(C)C(=S)NC1(C)C	11.5583	7.06691	204.55
ENVFUR	InChI=1S/C8H10N2O3/c1-9(2)6-5-7-3-4-8(13-7)10(11)12/h3-6H	1-2H3/b6-5+	4	1	H10C8O3N2	936.3962	-	368.4	461.73	CN(/C=C/c1ccc(o1)N(=O)=O)C	9.73349	3.5818	194.51
ENVFUR01	InChI=1S/C8H10N2O3/c1-9(2)6-5-7-3-4-8(13-7)10(11)12/h3-6H	1-2H3/b6-5+	8	1	H10C8O3N2	1784.4467	-	368.4	516.14	CN(/C=C/c1ccc(o1)N(=O)=O)C	10.67423	3.19302	222.78
EPOPDO	InChI=1S/C12H12O5/c13-9-11-3-1-2-4-12(11	10(14)17-9)8-6(16-8)5-7(11)15-5/h5-8H	1-4H2/t5-	6+	7-	8+	11+	12-	8	2	H12C12O5	2190.1012	-	382.2	458.26	O=C1OC(=O)[C@@]23[C@@]1(CCCC2)[C@@H]1O[C@@H]1[C@H]1[C@@H]3O1	10.01271	4.91622	183.55
EPOPDO01	InChI=1S/C12H12O5/c13-9-11-3-1-2-4-12(11	10(14)17-9)8-6(16-8)5-7(11)15-5/h5-8H	1-4H2/t5-	6+	7-	8+	11+	12-	8	2	H12C12O5	2160.3661	-	382.2	411.65	O=C1OC(=O)[C@@]23[C@@]1(CCCC2)[C@@H]1O[C@@H]1[C@H]1[C@@H]3O1	9.50974	4.66181	189.24
ESTRON11	InChI=1S/C18H22O2/c1-18-9-8-14-13-5-3-12(19)10-11(13)2-4-15(14)16(18)6-7-17(18)20/h3	5	10	14-16	19H	2	4	6-9H2	1H3/t14-	15-	16+	18+/m1/s1	4	1	H22C18O2	1493.2427	-	429.7	371.15	Oc1ccc2c(c1)CC[C@@H]1[C@@H]2CC[C@]2([C@H]1CCC2=O)C	10.26885	3.66921	132.12
ESTRON14	InChI=1S/C18H22O2/c1-18-9-8-14-13-5-3-12(19)10-11(13)2-4-15(14)16(18)6-7-17(18)20/h3	5	10	14-16	19H	2	4	6-9H2	1H3/t14-	15-	16+	18+/m1/s1	4	1	H22C18O2	1452.1872	-	429.7	358.46	Oc1ccc2c(c1)CC[C@@H]1[C@@H]2CC[C@]2([C@H]1CCC2=O)C	10.51385	4.66002	107.35
ETDIAM16	InChI=1S/C2H8N2/c3-1-2-4/h1-4H2	2	1	H8C2N2	184.7349	283	277.7	567.1	NCCN	10.40901	5.31398	290.64
ETDIAM18	InChI=1S/C2H8N2/c3-1-2-4/h1-4H2	2	1	H8C2N2	184.9775	283	277.7	498.75	NCCN	10.47966	6.04299	236.14
ETEYUX	InChI=1S/C13H11NO2/c15-12-7-5-11(6-8-12)14-9-10-3-1-2-4-13(10)16/h1-9	15-16H/b14-9+	8	2	H11C13O2N	2132.5897	406	409.2	489.76	Oc1ccc(cc1)/N=C/c1ccccc1O	10.53631	3.29964	171.91
ETEYUX01	InChI=1S/C13H11NO2/c15-12-7-5-11(6-8-12)14-9-10-3-1-2-4-13(10)16/h1-9	15-16H/b14-9+	8	1	H11C13O2N	2185.6403	406	409.2	373.72	Oc1ccc(cc1)/N=C/c1ccccc1O	9.58475	2.94342	155.97
ETOCEV	InChI=1S/C12H8N4S/c1-5-13-6-2-9(1)11-15-16-12(17-11)10-3-7-14-8-4-10/h1-8H	4	1	H8C12SN4	1052.6246	-	448.8	522.48	n1ccc(cc1)c1nnc(s1)c1ccncc1	14.72968	7.24508	147.13
ETOCEV01	InChI=1S/C12H8N4S/c1-5-13-6-2-9(1)11-15-16-12(17-11)10-3-7-14-8-4-10/h1-8H	4	1	H8SC12N4	1064.2698	-	448.8	469.47	n1ccc(cc1)c1nnc(s1)c1ccncc1	15.03449	5.93714	118.25
FACCOB01	InChI=1S/C7H8O2/c8-5-6-2-1-3-7(9)4-6/h1-4	8-9H	5H2	8	2	H8C7O2	1281.1474	-	352.6	534.35	OCc1cccc(c1)O	13.33066	6.8974	226.77
FACCOB02	InChI=1S/C7H8O2/c8-5-6-2-1-3-7(9)4-6/h1-4	8-9H	5H2	12	3	H8C7O2	1926.7089	-	352.6	598.83	OCc1cccc(c1)O	13.23759	6.533	299.66
FEFPEM	InChI=1S/C12H9NO3/c14-13(15)10-6-8-12(9-7-10)16-11-4-2-1-3-5-11/h1-9H	4	1	H9C12O3N	1040.7088	329	390.2	405.44	O=N(=O)c1ccc(cc1)Oc1ccccc1	11.07764	5.16333	136.75
FEFPEM01	InChI=1S/C12H9NO3/c14-13(15)10-6-8-12(9-7-10)16-11-4-2-1-3-5-11/h1-9H	4	2	H9C12O3N	1027.8384	329	390.2	390.84	O=N(=O)c1ccc(cc1)Oc1ccccc1	10.62188	4.54246	134.67
FEFSAK	InChI=1S/C8H7Cl2NO/c1-5(12)11-8-6(9)3-2-4-7(8)10/h2-4H	1H3	(H	11	12)	4	1	H7C8Cl2ON	902.6093	454.5	393.9	537.64	CC(=O)Nc1c(Cl)cccc1Cl	9.64805	5.14849	291.68
FEFSAK01	InChI=1S/C8H7Cl2NO/c1-5(12)11-8-6(9)3-2-4-7(8)10/h2-4H	1H3	(H	11	12)	4	1	H7C8Cl2ON	944.352	454.5	393.9	471.55	CC(=O)Nc1c(Cl)cccc1Cl	9.54942	4.21964	212.00
FEGWAP	InChI=1S/C15H18O4/c1-7-6-10-12(8(2)14(18)19-10)13(17)15(3)9(7)4-5-11(15)16/h4-5	7	9-10	12-13	17H	2	6H2	1	3H3/t7-	9+	10-	12-	13+	15+/m1/s1	2	1	H18C15O4	691.7986	-	428.1	395.67	C=C1C(=O)O[C@H]2[C@@H]1[C@H](O)[C@]1(C)C(=O)C=C[C@H]1[C@@H](C2)C	11.24206	4.40203	123.15
FEGWAP01	InChI=1S/C15H18O4/c1-7-6-10-12(8(2)14(18)19-10)13(17)15(3)9(7)4-5-11(15)16/h4-5	7	9-10	12-13	17H	2	6H2	1	3H3/t7-	9+	10-	12-	13+	15+/m1/s1	2	1	H18C15O4	658.9005	-	428.1	426.88	C=C1C(=O)O[C@H]2[C@@H]1[C@H](O)[C@]1(C)C(=O)C=C[C@H]1[C@@H](C2)C	11.97513	5.33411	116.50
FEVCAK01	InChI=1S/C16H12/c1-2-6-12-11(5-1)15-9-10-16(12)14-8-4-3-7-13(14)15/h1-10	15-16H/t15-	16+	8	1	H12C16	2209.0851	392.5	364.8	513.64	C1=C[C@@H]2c3c([C@H]1c1c2cccc1)cccc3	9.83089	4.58185	235.51
FEVCAK10	InChI=1S/C16H12/c1-2-6-12-11(5-1)15-9-10-16(12)14-8-4-3-7-13(14)15/h1-10	15-16H/t15-	16+	4	1	H12C16	1102.4404	392.5	364.8	508.58	C1=C[C@@H]2c3c([C@H]1c1c2cccc1)cccc3	10.12179	4.85959	228.37
FEVMUO	InChI=1S/C15H14O/c1-11-3-7-13(8-4-11)15(16)14-9-5-12(2)6-10-14/h3-10H	1-2H3	4	1	H14C15O	1162.4607	-	381.7	448.18	O=C(c1ccc(cc1)C)c1ccc(cc1)C	9.89951	3.85926	175.26
FEVMUO02	InChI=1S/C15H14O/c1-11-3-7-13(8-4-11)15(16)14-9-5-12(2)6-10-14/h3-10H	1-2H3	8	2	H14C15O	2343.6268	-	381.7	442.91	O=C(c1ccc(cc1)C)c1ccc(cc1)C	10.17846	4.59965	166.01
FEVNAV01	InChI=1S/C14H12O/c1-11-7-9-13(10-8-11)14(15)12-5-3-2-4-6-12/h2-10H	1H3	4	1	H12C14O	1097.0848	332	366.8	418.14	Cc1ccc(cc1)C(=O)c1ccccc1	10.76214	3.85182	148.01
FEVNAV02	InChI=1S/C14H12O/c1-11-7-9-13(10-8-11)14(15)12-5-3-2-4-6-12/h2-10H	1H3	3	1	H12C14O	817.4687	332	366.8	397.86	Cc1ccc(cc1)C(=O)c1ccccc1	9.42032	3.97998	161.63
FICGEE	InChI=1S/C10H13NO/c1-7-5-4-6-8(2)10(7)11-9(3)12/h4-6H	1-3H3	(H	11	12)	4	1	H13C10ON	940.2162	448	382.1	465.82	CC(=O)Nc1c(C)cccc1C	8.73706	5.06087	283.40
FICGEE03	InChI=1S/C10H13NO/c1-7-5-4-6-8(2)10(7)11-9(3)12/h4-6H	1-3H3	(H	11	12)	8	1	H13C10ON	1899.9838	448	382.1	551.81	CC(=O)Nc1c(C)cccc1C	9.88061	5.17068	279.33
FILGEM	InChI=1S/C12H9N3O/c1-8-11(9-2-4-14-5-3-9)6-10(7-13)12(16)15-8/h2-6H	1H3	(H	15	16)	4	1	H9C12ON3	1089.9827	-	463.5	326.03	N#Cc1cc(c2ccncc2)c([nH]c1=O)C	10.85847	4.53416	112.27
FILGEM03	InChI=1S/C12H9N3O/c1-8-11(9-2-4-14-5-3-9)6-10(7-13)12(16)15-8/h2-6H	1H3	(H	15	16)	8	1	H9C12ON3	2104.7994	-	463.5	417.52	N#Cc1cc(c2ccncc2)c([nH]c1=O)C	11.19168	5.23042	144.96
FLYITU	InChI=1S/C14H12N2S/c15-14(16)17-13-11-7-3-1-5-9(11)10-6-2-4-8-12(10)13/h1-8	13H	(H3	15	16)	4	1	H12SC14N2	1211.8583	-	440.1	404.29	NC(=N)S[C@@H]1c2ccccc2c2c1cccc2	10.4111	4.70669	127.56
FLYITU01	InChI=1S/C14H12N2S/c15-14(16)17-13-11-7-3-1-5-9(11)10-6-2-4-8-12(10)13/h1-8	13H	(H3	15	16)	4	2	H12SC14N2	1168.8041	-	440.1	503.64	NC(=N)S[C@@H]1c2ccccc2c2c1cccc2	12.39354	7.54124	146.76
FOWZUN	InChI=1S/C11H14N2O3/c1-8(14)13-12-7-9-4-5-10(15-2)11(6-9)16-3/h4-7H	1-3H3	(H	13	14)/b12-7+	2	2	H14C11O3N2	602.5353	470	430.3	373.99	COc1cc(/C=N/NC(=O)C)ccc1OC	8.44856	4.22491	142.60
FOWZUN01	InChI=1S/C11H14N2O3/c1-8(14)13-12-7-9-4-5-10(15-2)11(6-9)16-3/h4-7H	1-3H3	(H	13	14)/b12-7+	8	1	H14C11O3N2	2379.3497	470	430.3	465.92	COc1cc(/C=N/NC(=O)C)ccc1OC	10.75511	3.87113	146.08
FUFSIJ	InChI=1S/C11H9N3O2/c12-11(16)14-13-9-6-5-7-3-1-2-4-8(7)10(9)15/h1-6H	(H3	12	14	16)	4	1	H9C11O2N3	1006.0153	-	434	498.98	NC(=O)N[N]C1=C[CH]c2c(C1=O)cccc2	11.78959	4.12654	136.06
FUFSIJ01	InChI=1S/C11H9N3O2/c12-11(16)14-13-9-6-5-7-3-1-2-4-8(7)10(9)15/h1-6H	(H3	12	14	16)/b13-9-	2	1	H9C11O2N3	501.6693	-	434	500.03	NC(=O)N/N=C\1/C=Cc2c(C1=O)cccc2	13.34354	4.99057	137.34
FUGJUM	InChI=1S/C5H6O2/c6-4-2-1-3-5(4)7/h2	6H	1	3H2	8	2	H6C5O2	993.6804	-	306.3	505.21	O=C1CCC=C1O	8.21478	4.34431	384.32
FUGJUM01	InChI=1S/C5H6O2/c6-4-2-1-3-5(4)7/h2	6H	1	3H2	4	1	H6C5O2	482.0692	-	306.3	562.17	O=C1CCC=C1O	9.13273	4.054	340.73
FUMAAC	InChI=1S/C4H4O4/c5-3(6)1-2-4(7)8/h1-2H	(H	5	6)(H	7	8)/b2-1+	4	2	H4C4O4	481.2044	-	369	177.77	OC(=O)/C=C/C(=O)O	18.65169	8.25674	49.22
FUMAAC01	InChI=1S/C4H4O4/c5-3(6)1-2-4(7)8/h1-2H	(H	5	6)(H	7	8)/b2-1+	1	1	H4C4O4	117.1973	-	369	116.22	OC(=O)/C=C/C(=O)O	20.92542	9.55027	26.19
FURACL03	InChI=1S/C4H3FN2O2/c5-2-1-6-4(9)7-3(2)8/h1H	(H2	6	7	8	9)	4	1	H3C4FO2N2	503.0921	-	414.5	639.66	Fc1c[nH]c(=O)[nH]c1=O	12.21565	4.84063	248.62
FURACL14	InChI=1S/C4H3FN2O2/c5-2-1-6-4(9)7-3(2)8/h1H	(H2	6	7	8	9)	8	4	H3C4FO2N2	1047.5723	-	414.5	571.56	Fc1c[nH]c(=O)[nH]c1=O	11.66871	4.0425	212.49
FURHUV02	InChI=1S/S8/c1-2-4-6-8-7-5-3-1	4	2	S8	836.2796	392	484.6	485.33	S1SSSSSSS1	9.97751	4.64661	142.10
FURHUV10	InChI=1S/S8/c1-2-4-6-8-7-5-3-1	6	3	S8	1293.1753	392	484.6	517.24	S1SSSSSSS1	9.8499	3.98192	160.82
FUZMET	InChI=1S/C18H16O2/c1-13(19)17-9-5-15(6-10-17)3-4-16-7-11-18(12-8-16)14(2)20/h3-12H	1-2H3/b4-3+	2	1	H16C18O2	686.4615	-	440.4	422.44	CC(=O)c1ccc(cc1)/C=C/c1ccc(cc1)C(=O)C	11.89045	3.58398	117.98
FUZMET01	InChI=1S/C18H16O2/c1-13(19)17-9-5-15(6-10-17)3-4-16-7-11-18(12-8-16)14(2)20/h3-12H	1-2H3/b4-3+	2	1	H16C18O2	700.5704	-	440.4	407.91	CC(=O)c1ccc(cc1)/C=C/c1ccc(cc1)C(=O)C	11.67729	3.55262	110.45
GAGSIR03	InChI=1S/C11H8O3/c1-7(12)9-6-8-4-2-3-5-10(8)14-11(9)13/h2-6H	1H3	4	2	H8C11O3	883.4666	396	384.1	607.28	CC(=O)c1cc2ccccc2oc1=O	12.04104	3.86216	224.51
GAGSIR05	InChI=1S/C11H8O3/c1-7(12)9-6-8-4-2-3-5-10(8)14-11(9)13/h2-6H	1H3	4	1	H8C11O3	867.4749	396	384.1	559.61	CC(=O)c1cc2ccccc2oc1=O	12.21178	4.51156	184.36
GALCAX	InChI=1S/C18H18O2/c19-17(15-9-3-1-4-10-15)13-7-8-14-18(20)16-11-5-2-6-12-16/h1-6	9-12H	7-8	13-14H2	4	1	H18C18O2	1432.0036	382	429.2	339.23	O=C(c1ccccc1)CCCCC(=O)c1ccccc1	10.7813	3.20433	103.89
GALCAX01	InChI=1S/C18H18O2/c19-17(15-9-3-1-4-10-15)13-7-8-14-18(20)16-11-5-2-6-12-16/h1-6	9-12H	7-8	13-14H2	1	1	H18C18O2	357.9367	382	429.2	303.72	O=C(c1ccccc1)CCCCC(=O)c1ccccc1	10.013	3.04415	93.83
GAXLEW	InChI=1S/C14H6Cl2O4/c15-9-10(16)14(20)8-7(13(9)19)11(17)5-3-1-2-4-6(5)12(8)18/h1-4	19-20H	4	1	H6C14O4Cl2	1215.7397	521	448	550.33	O=C1c2ccccc2C(=O)c2c1c(O)c(c(c2O)Cl)Cl	11.78231	4.83959	194.02
GAXLEW01	InChI=1S/C14H6Cl2O4/c15-9-10(16)14(20)8-7(13(9)19)11(17)5-3-1-2-4-6(5)12(8)18/h1-4	19-20H	2	1	H6C14O4Cl2	603.6028	521	448	504.55	O=C1c2ccccc2C(=O)c2c1c(O)c(c(c2O)Cl)Cl	10.59634	2.72011	224.88
GEBTUC	InChI=1S/C5H4N4O/c10-5-3-4(7-1-6-3)8-2-9-5/h1-2H	(H2	6	7	8	9	10)	4	2	H4C5ON4	581.6431	-	467	164.75	O=c1[nH]cnc2c1nc[nH]2	16.48991	6.80175	32.29
GEBTUC01	InChI=1S/C5H4N4O/c10-5-3-4(7-1-6-3)8-2-9-5/h1-2H	(H2	6	7	8	9	10)	4	1	H4C5ON4	581.3471	-	467	69.55	O=c1[nH]cnc2c1nc[nH]2	15.06876	5.94738	13.29
GEDKEH	InChI=1S/C10H9N3O2/c1-7-12-11-6-13(7)9-4-2-8(3-5-9)10(14)15/h2-6H	1H3	(H	14	15)	16	2	H9C10O2N3	3843.2918	-	442.2	419.43	OC(=O)c1ccc(cc1)n1cnnc1C	13.03021	5.65425	114.18
GEDKEH01	InChI=1S/C10H9N3O2/c1-7-12-11-6-13(7)9-4-2-8(3-5-9)10(14)15/h2-6H	1H3	(H	14	15)	8	1	H9C10O2N3	1901.8805	-	442.2	437.25	OC(=O)c1ccc(cc1)n1cnnc1C	12.51345	7.46116	106.07
GEMGAG01	InChI=1S/C21H23NO5/c1-22-7-6-14-9-19-20(27-12-26-19)10-15(14)17(23)8-13-4-5-18(24-2)21(25-3)16(13)11-22/h4-5	9-10H	6-8	11-12H2	1-3H3	4	1	H23C21O5N	1803.7713	438	477.5	375.97	COc1c(OC)ccc2c1CN(C)CCc1c(C(=O)C2)cc2c(c1)OCO2	13.07381	6.32323	87.04
GEMGAG02	InChI=1S/C21H23NO5/c1-22-7-6-14-9-19-20(27-12-26-19)10-15(14)17(23)8-13-4-5-18(24-2)21(25-3)16(13)11-22/h4-5	9-10H	6-8	11-12H2	1-3H3	4	1	H23C21O5N	1873.4235	438	477.5	343.02	COc1c(OC)ccc2c1CN(C)CCc1c(C(=O)C2)cc2c(c1)OCO2	12.02597	5.76993	83.63
GICTIV	InChI=1S/C4H2N10O4/c15-13(16)11-1-5-3(9-11)7-8-4-6-2-12(10-4)14(17)18/h1-2H	2	1	H2C4O4N10	458.2206	-	458.4	516.36	O=N(=O)n1cnc(n1)[N][N]c1ncn(n1)N(=O)=O	13.42942	6.07105	108.59
GICTIV01	InChI=1S/C4H2N10O4/c15-13(16)11-1-5-3(9-11)7-8-4-6-2-12(10-4)14(17)18/h1-2H	2	1	H2C4O4N10	483.7782	-	458.4	530.52	O=N(=O)n1cnc(n1)[N][N]c1ncn(n1)N(=O)=O	12.48953	3.19016	131.09
GIMBUZ	InChI=1S/C21H18N2O3/c24-18-10-4-1-7-15(18)13-22-21(17-9-3-6-12-20(17)26)23-14-16-8-2-5-11-19(16)25/h1-14	21	24-26H/b22-13+	23-14+	8	1	H18C21O3N2	3629.5485	425	487.1	145.12	Oc1ccccc1[C@@H](/N=C/c1ccccc1O)/N=C/c1ccccc1O	10.75523	7.42407	31.59
GIMBUZ01	InChI=1S/C21H18N2O3/c24-18-10-4-1-7-15(18)13-22-21(17-9-3-6-12-20(17)26)23-14-16-8-2-5-11-19(16)25/h1-14	21	24-26H/b22-13+	23-14+	2	1	H18C21O3N2	908.8899	425	487.1	316.79	Oc1ccccc1[C@@H](/N=C/c1ccccc1O)/N=C/c1ccccc1O	10.44358	5.98403	91.65
GINCAI	InChI=1S/C8H8O3/c1-5(9)7-3-2-6(10)4-8(7)11/h2-4	10-11H	1H3	4	1	H8C8O3	739.54	-	368.7	483.46	Oc1ccc(c(c1)O)C(=O)C	12.48777	4.13774	175.57
GINCAI02	InChI=1S/C8H8O3/c1-5(9)7-3-2-6(10)4-8(7)11/h2-4	10-11H	1H3	12	3	H8C8O3	2212.7891	-	368.7	453.93	Oc1ccc(c(c1)O)C(=O)C	10.18998	2.48865	194.52
GOFVAZ	InChI=1S/C14H10N2O/c1-2-6-11(7-3-1)17-14-10-15-12-8-4-5-9-13(12)16-14/h1-10H	8	1	H10C14ON2	2243.8138	-	404	440.89	c1ccc(cc1)Oc1cnc2c(n1)cccc2	10.44081	5.72444	170.94
GOFVAZ01	InChI=1S/C14H10N2O/c1-2-6-11(7-3-1)17-14-10-15-12-8-4-5-9-13(12)16-14/h1-10H	4	1	H10C14ON2	1100.1283	-	404	388.86	c1ccc(cc1)Oc1cnc2c(n1)cccc2	9.85328	5.53506	151.60
GOLLUO	InChI=1S/C11H10O2/c12-8-3-4-9(13)11-7-2-1-6(5-7)10(8)11/h1-4	6-7	10-11H	5H2/t6-	7+	10+	11-	8	2	H10C11O2	1781.8204	-	349.7	469.1	O=C1C=CC(=O)[C@@H]2[C@H]1[C@@H]1C=C[C@H]2C1	10.40681	4.04374	191.63
GOLLUO01	InChI=1S/C11H10O2/c12-8-3-4-9(13)11-7-2-1-6(5-7)10(8)11/h1-4	6-7	10-11H	5H2/t6-	7+	10+	11-	8	1	H10C11O2	1784.1537	-	349.7	470.99	O=C1C=CC(=O)[C@@H]2[C@H]1[C@@H]1C=C[C@H]2C1	10.16041	3.62844	203.91
GUMXAO	InChI=1S/C8H7ClO3/c9-6-4-2-1-3-5(6)7(10)8(11)12/h1-4	7	10H	(H	11	12)/t7-/m1/s1	8	2	H7C8O3Cl	1656.4612	-	466.1	549.23	OC(=O)[C@@H](c1ccccc1Cl)O	12.63081	8.54213	140.36
GUMXAO02	InChI=1S/C8H7ClO3/c9-6-4-2-1-3-5(6)7(10)8(11)12/h1-4	7	10H	(H	11	12)/t7-/m0/s1	4	2	H7C8O3Cl	877.3229	-	466.1	438.77	OC(=O)[C@H](c1ccccc1Cl)O	9.54877	6.1235	167.14
GUQRIU01	InChI=1S/C28H24O4/c1-31-21-15-11-19(12-16-21)27(29)23-7-3-5-9-25(23)28(30	26-10-6-4-8-24(26)27)20-13-17-22(32-2)18-14-20/h3-18	29-30H	1-2H3/t27-	28-	1	1	H24C28O4	532.8006	522	512.9	354.81	COc1ccc(cc1)[C@]1(O)c2ccccc2[C@@](c2c1cccc2)(O)c1ccc(cc1)OC	12.15828	7.10878	74.36
GUQRIU04	InChI=1S/C28H24O4/c1-31-21-15-11-19(12-16-21)27(29)23-7-3-5-9-25(23)28(30	26-10-6-4-8-24(26)27)20-13-17-22(32-2)18-14-20/h3-18	29-30H	1-2H3/t27-	28-	2	1	H24C28O4	1075.0657	522	512.9	349.98	COc1ccc(cc1)[C@]1(O)c2ccccc2[C@@](c2c1cccc2)(O)c1ccc(cc1)OC	11.661	6.78724	78.46
HACTPH11	InChI=1S/C8H8O2/c1-6(9)7-2-4-8(10)5-3-7/h2-5	10H	1H3	8	2	H8C8O2	1401.6514	-	344.8	521.12	CC(=O)c1ccc(cc1)O	9.95039	2.96913	238.76
HACTPH12	InChI=1S/C8H8O2/c1-6(9)7-2-4-8(10)5-3-7/h2-5	10H	1H3	4	1	H8C8O2	704.8357	-	344.8	509.68	CC(=O)c1ccc(cc1)O	10.67748	3.01819	257.85
HADNOP	InChI=1S/C12H24S4/c1-5-13-7-2-9-15-11-4-12-16-10-3-8-14-6-1/h1-12H2	4	1	H24S4C12	1549.4595	332	437	303.96	C1CCSCCCSCCCSCCCS1	10.98437	5.00442	82.52
HADNOP01	InChI=1S/C12H24S4/c1-5-13-7-2-9-15-11-4-12-16-10-3-8-14-6-1/h1-12H2	2	1	H24S4C12	770.6414	332	437	312.23	C1CCSCCCSCCCSCCCS1	11.85986	4.35964	78.33
HAKTAP	InChI=1S/C25H30O4/c1-21(2	3)16-14-23(22(4	5)6)19(18(16)27)25(23)20-17(26)12-13-24(28-20	29-25)15-10-8-7-9-11-15/h7-11	14	19-20H	12-13H2	1-6H3/t19-	20+	23+	24-	25-/m0/s1	4	1	H30C25O4	2174.1768	-	458.3	343.17	O=C1CC[C@@]2(O[C@H]1[C@@]1(O2)[C@@H]2[C@]1(C=C(C2=O)C(C)(C)C)C(C)(C)C)c1ccccc1	10.28174	6.1067	103.70
HAKTAP01	InChI=1S/C25H30O4/c1-21(2	3)16-14-23(22(4	5)6)19(18(16)27)25(23)20-17(26)12-13-24(28-20	29-25)15-10-8-7-9-11-15/h7-11	14	19-20H	12-13H2	1-6H3/t19-	20+	23+	24-	25-/m1/s1	4	1	H30C25O4	2160.5494	-	458.3	314.44	O=C1CC[C@]2(O[C@@H]1[C@]1(O2)[C@H]2[C@@]1(C=C(C2=O)C(C)(C)C)C(C)(C)C)c1ccccc1	9.57583	5.67266	106.78
HAVBIQ03	InChI=1S/C13H10N2O/c16-12-8-4-1-5-9(12)13-14-10-6-2-3-7-11(10)15-13/h1-8	16H	(H	14	15)	4	1	H10C13ON2	1046.9395	510	438.9	529.07	Oc1ccccc1c1nc2c([nH]1)cccc2	10.35143	3.80695	193.87
HAVBIQ05	InChI=1S/C13H10N2O/c16-12-8-4-1-5-9(12)13-14-10-6-2-3-7-11(10)15-13/h1-8	16H	(H	14	15)	4	1	H10C13ON2	1016.0281	510	438.9	535.64	Oc1ccccc1c1nc2c([nH]1)cccc2	10.01023	3.63366	195.27
HEPJOC	InChI=1S/C20H20N2O/c1-20(2)11-16(10-17(12-20)18(13-21)14-22)5-4-15-6-8-19(23-3)9-7-15/h4-10H	11-12H2	1-3H3/b5-4+	4	1	H20C20ON2	1726.3182	-	453.8	343.34	N#CC(=C1C=C(/C=C/c2ccc(cc2)OC)CC(C1)(C)C)C#N	9.2396	4.99365	132.97
HEPJOC01	InChI=1S/C20H20N2O/c1-20(2)11-16(10-17(12-20)18(13-21)14-22)5-4-15-6-8-19(23-3)9-7-15/h4-10H	11-12H2	1-3H3/b5-4+	4	1	H20C20ON2	1696.6119	-	453.8	374.28	N#CC(=C1C=C(/C=C/c2ccc(cc2)OC)CC(C1)(C)C)C#N	11.91976	4.46463	105.87
HEYHUO	InChI=1S/C18H14O/c19-17-11-13-18(14-12-17	15-7-3-1-4-8-15)16-9-5-2-6-10-16/h1-14H	2	1	H14C18O	659.6404	394	410.4	406.21	O=C1C=C[C@](C=C1)(c1ccccc1)c1ccccc1	10.82452	6.88426	124.14
HEYHUO03	InChI=1S/C18H14O/c19-17-11-13-18(14-12-17	15-7-3-1-4-8-15)16-9-5-2-6-10-16/h1-14H	16	2	H14C18O	5377.5206	394	410.4	393.69	O=C1C=C[C@](C=C1)(c1ccccc1)c1ccccc1	10.73921	5.59269	123.93
HIBXOF	InChI=1S/C13H9NO/c15-13-9-5-1-3-7-11(9)14-12-8-4-2-6-10(12)13/h1-8H	(H	14	15)	4	1	H9C13ON	942.5223	-	420	455.44	O=c1c2ccccc2[nH]c2c1cccc2	11.58983	4.29116	149.86
HIBXOF01	InChI=1S/C13H9NO/c15-13-9-5-1-3-7-11(9)14-12-8-4-2-6-10(12)13/h1-8H	(H	14	15)	2	2	H9C13ON	470.6464	-	420	510.23	O=c1c2ccccc2[nH]c2c1cccc2	11.49984	4.20789	183.20
HIHKUE	InChI=1S/C14H10O2/c15-14(16)12-7-3-5-10-8-9-4-1-2-6-11(9)13(10)12/h1-7H	8H2	(H	15	16)	8	2	H10C14O2	2071.8676	-	408.3	441.65	OC(=O)c1cccc2c1c1ccccc1C2	10.53422	3.9496	151.33
HIHKUE01	InChI=1S/C14H10O2/c15-14(16)12-7-3-5-10-8-9-4-1-2-6-11(9)13(10)12/h1-7H	8H2	(H	15	16)	4	1	H10C14O2	1050.5922	-	408.3	436.81	OC(=O)c1cccc2c1c1ccccc1C2	10.28413	4.39196	155.68
HIHROF	InChI=1S/C12H8N2O4S3/c15-13(16)9-5-1-3-7-11(9)19-21-20-12-8-4-2-6-10(12)14(17)18/h1-8H	2	1	H8S3C12O4N2	681.3085	448	480.8	414.01	O=N(=O)c1ccccc1SSSc1ccccc1N(=O)=O	12.8469	7.8926	90.20
HIHROF01	InChI=1S/C12H8N2O4S3/c15-13(16)9-5-1-3-7-11(9)19-21-20-12-8-4-2-6-10(12)14(17)18/h1-8H	2	1	H8S3C12O4N2	685.2933	448	480.8	461.66	O=N(=O)c1ccccc1SSSc1ccccc1N(=O)=O	12.62599	8.31692	106.48
HIMWIJ	InChI=1S/C15H13NO4/c1-20-15-10-12(6-9-14(15)17)3-2-11-4-7-13(8-5-11)16(18)19/h2-10	17H	1H3/b3-2+	8	1	H13C15O4N	2597.9059	449	446.7	456.4	COc1cc(/C=C/c2ccc(cc2)N(=O)=O)ccc1O	11.33535	3.34133	137.35
HIMWIJ01	InChI=1S/C15H13NO4/c1-20-15-10-12(6-9-14(15)17)3-2-11-4-7-13(8-5-11)16(18)19/h2-10	17H	1H3/b3-2+	8	1	H13C15O4N	2597.04	449	446.7	208.22	COc1cc(/C=C/c2ccc(cc2)N(=O)=O)ccc1O	12.17671	3.35843	50.46
HIWJIG	InChI=1S/C3H5N3/c4-3-1-5-6-2-3/h1-2H	4H2	(H	5	6)	4	1	H5C3N3	468.6879	-	335.4	437.69	Nc1c[nH]nc1	9.42347	4.2937	183.77
HIWJIG01	InChI=1S/C3H5N3/c4-3-1-5-6-2-3/h1-2H	4H2	(H	5	6)	4	1	H5C3N3	416.9305	-	335.4	580.46	Nc1c[nH]nc1	11.81196	4.84653	221.54
HODWED	InChI=1S/C14H15NO2S/c1-11-7-6-8-12(2)14(11)15-18(16	17)13-9-4-3-5-10-13/h3-10	15H	1-2H3	4	1	H15C14SO2N	1287.8087	-	434.6	431.64	Cc1cccc(c1NS(=O)(=O)c1ccccc1)C	11.34169	7.5886	122.54
HODWED02	InChI=1S/C14H15NO2S/c1-11-7-6-8-12(2)14(11)15-18(16	17)13-9-4-3-5-10-13/h3-10	15H	1-2H3	4	1	H15SC14O2N	1306.8171	-	434.6	442.52	Cc1cccc(c1NS(=O)(=O)c1ccccc1)C	10.61515	4.7101	150.09
HOFLOE	InChI=1S/C11H14N2O3/c1-3-16-11(15)13-12-8(2)9-6-4-5-7-10(9)14/h4-7	14H	3H2	1-2H3	(H	13	15)/b12-8+	4	1	H14C11O3N2	1143.2635	488	403.1	495.29	CCOC(=O)N/N=C(/c1ccccc1O)\C	9.78552	3.39915	206.70
HOFLOE01	InChI=1S/C11H14N2O3/c1-3-16-11(15)13-12-8(2)9-6-4-5-7-10(9)14/h4-7	14H	3H2	1-2H3	(H	13	15)/b12-8+	2	1	H14C11O3N2	570.8535	488	403.1	500.98	CCOC(=O)N/N=C(/c1ccccc1O)\C	9.22459	3.91394	272.41
HOFMAQ	InChI=1S/C23H22S2/c1-5-20-6-2-18(1)13-19-3-7-21(8-4-19)15-25-17-23-11-9-22(10-12-23)16-24-14-20/h1-12H	13-17H2	4	1	H22S2C23	1865.6881	492.5	480.5	402.17	S1Cc2ccc(cc2)CSCc2ccc(Cc3ccc(C1)cc3)cc2	12.83203	6.1762	85.98
HOFMAQ01	InChI=1S/C23H22S2/c1-5-20-6-2-18(1)13-19-3-7-21(8-4-19)15-25-17-23-11-9-22(10-12-23)16-24-14-20/h1-12H	13-17H2	4	1	H22S2C23	1870.2226	492.5	480.5	413.91	S1Cc2ccc(cc2)CSCc2ccc(Cc3ccc(C1)cc3)cc2	13.69668	6.4055	91.46
HOFNOF	InChI=1S/C13H19NO2/c15-10-3-7-12-5-1-2-6-13(12	9-10)14-11(16)4-8-12/h1-9H2	(H	14	16)/t12-	13-/m1/s1	4	1	H19C13O2N	1170.7087	462	420.6	461.94	O=C1CC[C@]23[C@](C1)(CCCC2)NC(=O)CC3	10.82257	6.13223	160.10
HOFNOF01	InChI=1S/C13H19NO2/c15-10-3-7-12-5-1-2-6-13(12	9-10)14-11(16)4-8-12/h1-9H2	(H	14	16)/t12-	13-/m1/s1	8	1	H19C13O2N	2388.2275	462	420.6	433.29	O=C1CC[C@]23[C@](C1)(CCCC2)NC(=O)CC3	9.83498	5.01544	160.45
HOFWAB	InChI=1S/C16H6N6/c17-7-11-12(8-18)22-16-10-4-2-6-20-14(10)13-9(15(16)21-11)3-1-5-19-13/h1-6H	8	2	H6C16N6	2559.4798	-	469	487.89	N#Cc1nc2c(nc1C#N)c1cccnc1c1c2cccn1	10.37775	3.75761	169.21
HOFWAB01	InChI=1S/C16H6N6/c17-7-11-12(8-18)22-16-10-4-2-6-20-14(10)13-9(15(16)21-11)3-1-5-19-13/h1-6H	4	1	H6C16N6	1229.8398	-	469	483.3	N#Cc1nc2c(nc1C#N)c1cccnc1c1c2cccn1	11.13924	4.52721	142.22
HOHRIF	InChI=1S/C11H9N3O2/c15-11(9-3-5-12-6-4-9)14-13-8-10-2-1-7-16-10/h1-8H	(H	14	15)/b13-8+	4	1	H9C11O2N3	1063.2076	-	437.6	415.2	O=C(c1ccncc1)N/N=C/c1ccco1	12.34504	4.94863	129.95
HOHRIF01	InChI=1S/C11H9N3O2/c15-11(9-3-5-12-6-4-9)14-13-8-10-2-1-7-16-10/h1-8H	(H	14	15)/b13-8+	8	2	H9C11O2N3	2025.4517	-	437.6	498.52	O=C(c1ccncc1)N/N=C/c1ccco1	13.44862	5.1333	134.28
HORTAJ	InChI=1S/C9H12N2O2S2/c1-7-3-5-8(6-4-7)15(12	13)11-9(10)14-2/h3-6H	1-2H3	(H2	10	11)	8	1	H12S2C9O2N2	2323.0671	396	437	330.32	CS/C(=N/S(=O)(=O)c1ccc(cc1)C)/N	12.24291	7.72078	76.63
HORTAJ01	InChI=1S/C9H12N2O2S2/c1-7-3-5-8(6-4-7)15(12	13)11-9(10)14-2/h3-6H	1-2H3	(H2	10	11)	4	1	H12S2C9O2N2	1087.4935	396	437	410.05	CS/C(=N/S(=O)(=O)c1ccc(cc1)C)/N	11.80019	7.26387	101.66
HORTUE	InChI=1S/C10H9N3/c11-10-12-6-9(7-13-10)8-4-2-1-3-5-8/h1-7H	(H2	11	12	13)	4	1	H9C10N3	906.0142	438	405.7	446.15	Nc1ncc(cn1)c1ccccc1	11.29168	4.36727	176.40
HORTUE01	InChI=1S/C10H9N3/c11-10-12-6-9(7-13-10)8-4-2-1-3-5-8/h1-7H	(H2	11	12	13)	24	3	H9C10N3	5267.0773	438	405.7	475.65	Nc1ncc(cn1)c1ccccc1	10.3173	4.27465	173.85
HUDCOZ	InChI=1S/C21H14OS/c22-20(21-10-5-13-23-21)12-11-19-17-8-3-1-6-15(17)14-16-7-2-4-9-18(16)19/h1-14H/b12-11-	8	2	H14SC21O	3192.1102	-	463.2	389.13	O=C(c1cccs1)/C=C\c1c2ccccc2cc2c1cccc2	10.21596	5.99743	118.37
HUDCOZ01	InChI=1S/C21H14OS/c22-20(21-10-5-13-23-21)12-11-19-17-8-3-1-6-15(17)14-16-7-2-4-9-18(16)19/h1-14H/b12-11-	4	1	H14SC21O	1576.2388	-	463.2	402.76	O=C(c1cccs1)/C=C\c1c2ccccc2cc2c1cccc2	9.90902	5.42782	125.12
HUDHUK	InChI=1S/C11H9N3O2/c15-11(9-3-1-5-12-7-9)14-13-8-10-4-2-6-16-10/h1-8H	(H	14	15)/b13-8+	8	2	H9C11O2N3	2127.3973	-	437	435.53	O=C(c1cccnc1)N/N=C/c1ccco1	10.22513	4.65265	154.36
HUDHUK03	InChI=1S/C11H9N3O2/c15-11(9-3-1-5-12-7-9)14-13-8-10-4-2-6-16-10/h1-8H	(H	14	15)/b13-8+	4	2	H9C11O2N3	1058.5298	-	437	262.11	O=C(c1cccnc1)N/N=C/c1ccco1	9.68302	3.44239	95.21
HXACAN12	InChI=1S/C8H9NO2/c1-6(10)9-7-2-4-8(11)5-3-7/h2-5	11H	1H3	(H	9	10)	4	1	H9C8O2N	779.9615	443	394.7	531.77	CC(=O)Nc1ccc(cc1)O	11.28417	4.12513	202.76
HXACAN31	InChI=1S/C8H9NO2/c1-6(10)9-7-2-4-8(11)5-3-7/h2-5	11H	1H3	(H	9	10)	8	1	H9C8O2N	1544.7814	443	394.7	488.53	CC(=O)Nc1ccc(cc1)O	12.27525	3.67892	174.17
IBULIA	InChI=1S/C13H17NOS/c1-14-6-7-15-13(9-14)10-16-8-11-4-2-3-5-12(11)13/h2-5H	6-10H2	1H3/t13-/m0/s1	4	1	H17SC13ON	1174.8683	-	399.5	419.18	CN1CCO[C@@]2(C1)CSCc1c2cccc1	11.01528	4.57891	138.40
IBULIA01	InChI=1S/C13H17NOS/c1-14-6-7-15-13(9-14)10-16-8-11-4-2-3-5-12(11)13/h2-5H	6-10H2	1H3/t13-/m0/s1	4	1	H17SC13ON	1191.1424	-	399.5	444.68	CN1CCO[C@@]2(C1)CSCc1c2cccc1	11.51109	3.9408	136.60
IFUTOT	InChI=1S/C10H9N3/c1-2-4-9(5-3-1)13-10-8-11-6-7-12-10/h1-8H	(H	12	13)	4	1	H9C10N3	882.3842	-	375.6	464.95	c1ccc(cc1)Nc1cnccn1	10.81436	3.94428	177.57
IFUTOT01	InChI=1S/C10H9N3/c1-2-4-9(5-3-1)13-10-8-11-6-7-12-10/h1-8H	(H	12	13)	4	1	H9C10N3	889.2608	-	375.6	441.88	c1ccc(cc1)Nc1cnccn1	8.94273	3.32368	242.70
IHEMIR	InChI=1S/C8H6O2/c9-5-7-2-1-3-8(4-7)6-10/h1-6H	4	1	H6C8O2	652.1011	361	329.9	635.6	O=Cc1cccc(c1)C=O	11.89271	3.07506	273.27
IHEMIR01	InChI=1S/C8H6O2/c9-5-7-2-1-3-8(4-7)6-10/h1-6H	4	1	H6C8O2	645.9607	361	329.9	623.99	O=Cc1cccc(c1)C=O	12.30031	4.40481	257.05
ILIMEV	InChI=1S/C15H12O2/c16-14-8-4-5-12(11-14)9-10-15(17)13-6-2-1-3-7-13/h1-11	16H/b10-9+	4	1	H12C15O2	1137.1517	-	420.5	456.26	Oc1cccc(c1)/C=C/C(=O)c1ccccc1	11.57746	4.73226	139.48
ILIMEV01	InChI=1S/C15H12O2/c16-14-8-4-5-12(11-14)9-10-15(17)13-6-2-1-3-7-13/h1-11	16H/b10-9+	8	1	H12C15O2	2279.3228	-	420.5	433.5	Oc1cccc(c1)/C=C/C(=O)c1ccccc1	12.00796	4.04011	123.91
ILIMEV02	InChI=1S/C15H12O2/c16-14-8-4-5-12(11-14)9-10-15(17)13-6-2-1-3-7-13/h1-11	16H/b10-9+	4	1	H12C15O2	1134.6639	-	420.5	442.49	Oc1cccc(c1)/C=C/C(=O)c1ccccc1	12.11625	4.43992	129.57
INDIGO03	InChI=1S/C16H10N2O2/c19-15-9-5-1-3-7-11(9)17-13(15)14-16(20)10-6-2-4-8-12(10)18-14/h1-8	17-18H/b14-13+	2	1	H10C16O2N2	595.0185	-	471.4	473.72	O=C1c2ccccc2N/C/1=C\1/Nc2c(C1=O)cccc2	13.05262	5.5175	114.51
INDIGO04	InChI=1S/C16H10N2O2/c19-15-9-5-1-3-7-11(9)17-13(15)14-16(20)10-6-2-4-8-12(10)18-14/h1-8	17-18H/b14-13+	2	1	H10C16O2N2	597.339	-	471.4	488.34	O=C1c2ccccc2N/C/1=C\1/Nc2c(C1=O)cccc2	12.59853	5.14313	114.81
IQAREY	InChI=1S/C10H10O3/c1-10-6-7-4-2-3-5-8(7)9(11-10)12-13-10/h2-5	9H	6H2	1H3/t9-	10+/m1/s1	4	1	H10C10O3	862.18	-	347.6	515.91	C[C@@]12OO[C@@H](O1)c1c(C2)cccc1	10.79507	4.4961	207.54
IQAREY01	InChI=1S/C10H10O3/c1-10-6-7-4-2-3-5-8(7)9(11-10)12-13-10/h2-5	9H	6H2	1H3/t9-	10+/m1/s1	4	2	H10C10O3	860.7398	-	347.6	543.4065	C[C@@]12OO[C@@H](O1)c1c(C2)cccc1	10.12101	3.48377	301.34
IRUFEH	InChI=1S/C4HCl2NO2/c5-1-2(6)4(9)7-3(1)8/h(H	7	8	9)	4	1	HC4Cl2O2N	607.5492	-	401.1	589.24	O=C1NC(=O)C(=C1Cl)Cl	11.97942	3.91581	234.19
IRUFEH01	InChI=1S/C4HCl2NO2/c5-1-2(6)4(9)7-3(1)8/h(H	7	8	9)	8	1	HC4Cl2O2N	1170.8752	-	401.1	628.47	O=C1NC(=O)C(=C1Cl)Cl	12.0773	4.3167	200.20
ISUNAL	InChI=1S/C16H13N3/c17-16-18-14(12-7-3-1-4-8-12)11-15(19-16)13-9-5-2-6-10-13/h1-11H	(H2	17	18	19)	4	2	H13C16N3	1301.6313	-	538.4	535.27	Nc1nc(cc(n1)c1ccccc1)c1ccccc1	10.38428	5.13561	194.56
ISUNAL01	InChI=1S/C16H13N3/c17-16-18-14(12-7-3-1-4-8-12)11-15(19-16)13-9-5-2-6-10-13/h1-11H	(H2	17	18	19)	8	2	H13C16N3	2633.195	-	538.4	494.83	Nc1nc(cc(n1)c1ccccc1)c1ccccc1	10.46368	3.40862	153.36
IWUKAM	InChI=1S/C18H21N9/c1-10-7-13(4)25(22-10)16-19-17(26-14(5)8-11(2)23-26)21-18(20-16)27-15(6)9-12(3)24-27/h7-9H	1-6H3	4	1	H21C18N9	1863.5356	515	487.4	370.44	Cc1cc(nn1c1nc(nc(n1)n1nc(cc1C)C)n1nc(cc1C)C)C	9.62877	4.86315	118.83
IWUKAM01	InChI=1S/C18H21N9/c1-10-7-13(4)25(22-10)16-19-17(26-14(5)8-11(2)23-26)21-18(20-16)27-15(6)9-12(3)24-27/h7-9H	1-6H3	4	1	H21C18N9	1840.5213	515	487.4	390.55	Cc1cc(nn1c1nc(nc(n1)n1nc(cc1C)C)n1nc(cc1C)C)C	9.90683	4.85996	114.57
JARPEX	InChI=1S/C16H12N2O/c19-15-11-10-12-6-4-5-9-14(12)16(15)18-17-13-7-2-1-3-8-13/h1-11	17H/b18-16-	8	1	H12C16ON2	2531.9399	-	412.8	441.59	O=C1C=Cc2c(/C/1=N/Nc1ccccc1)cccc2	9.15871	2.74212	223.88
JARPEX03	InChI=1S/C16H12N2O/c19-15-11-10-12-6-4-5-9-14(12)16(15)18-17-13-7-2-1-3-8-13/h1-11	17H/b18-16-	8	2	H12C16ON2	2559.1868	-	412.8	455.16	O=C1C=Cc2c(/C/1=N/Nc1ccccc1)cccc2	9.81653	2.2418	193.90
JARXUV	InChI=1S/C34H26O4/c1-21(35)37-33(31-27-15-7-3-11-23(27)19-24-12-4-8-16-28(24)31)34(38-22(2)36)32-29-17-9-5-13-25(29)20-26-14-6-10-18-30(26)32/h3-20	33-34H	1-2H3/t33-	34+	2	1	H26C34O4	1261.1901	593	539.6	387.82	CC(=O)O[C@H](c1c2ccccc2cc2c1cccc2)[C@H](c1c2ccccc2cc2c1cccc2)OC(=O)C	10.58011	6.68337	96.45
JARXUV01	InChI=1S/C34H26O4/c1-21(35)37-33(31-27-15-7-3-11-23(27)19-24-12-4-8-16-28(24)31)34(38-22(2)36)32-29-17-9-5-13-25(29)20-26-14-6-10-18-30(26)32/h3-20	33-34H	1-2H3/t33-	34+	2	1	H26C34O4	1319.6927	593	539.6	375.61	CC(=O)O[C@H](c1c2ccccc2cc2c1cccc2)[C@H](c1c2ccccc2cc2c1cccc2)OC(=O)C	10.5313	4.62654	93.88
JATFUF01	InChI=1S/C6H9N3O3/c1-10-4-7-5(11-2)9-6(8-4)12-3/h1-3H3	4	1	H9C6O3N3	799.8575	365	364.5	516.2	COc1nc(OC)nc(n1)OC	11.58041	5.24564	185.37
JATFUF02	InChI=1S/C6H9N3O3/c1-10-4-7-5(11-2)9-6(8-4)12-3/h1-3H3	2	1	H9C6O3N3	394.7667	365	364.5	532.1	COc1nc(OC)nc(n1)OC	11.39463	5.51278	199.55
JATFUF03	InChI=1S/C6H9N3O3/c1-10-4-7-5(11-2)9-6(8-4)12-3/h1-3H3	6	1	H9C6O3N3	1171.6961	365	364.5	626.26	COc1nc(OC)nc(n1)OC	11.52951	5.33742	244.60
JAVWIN	InChI=1S/C13H9F2NO/c14-10-7-5-9(6-8-10)13(17)16-12-4-2-1-3-11(12)15/h1-8H	(H	16	17)	4	1	H9C13F2ON	1080.2472	-	402.9	469.08	Fc1ccc(cc1)C(=O)Nc1ccccc1F	10.81976	2.79615	167.83
JAVWIN01	InChI=1S/C13H9F2NO/c14-10-7-5-9(6-8-10)13(17)16-12-4-2-1-3-11(12)15/h1-8H	(H	16	17)	2	1	H9C13F2ON	541.6566	-	402.9	481.57	Fc1ccc(cc1)C(=O)Nc1ccccc1F	10.70032	4.16212	181.20
JIMVUW	InChI=1S/C8H8O4/c1-4-3-6(10)7(5(2)9)8(11)12-4/h3	10H	1-2H3	4	2	H8C8O4	757.2258	-	370.1	623.09	Cc1cc(O)c(c(=O)o1)C(=O)C	11.54143	3.35442	249.83
JIMVUW01	InChI=1S/C8H8O4/c1-4-3-6(10)7(5(2)9)8(11)12-4/h3	10H	1-2H3	8	2	H8C8O4	1510.505	-	370.1	647.87	Cc1cc(O)c(c(=O)o1)C(=O)C	11.5204	4.10065	262.20
JIWPEL	InChI=1S/C21H28O5/c1-19-7-5-13(23)9-12(19)3-4-14-15-6-8-21(26	17(25)11-22)20(15	2)10-16(24)18(14)19/h5	7	9	14-16	18	22	24	26H	3-4	6	8	10-11H2	1-2H3/t14-	15-	16-	18+	19-	20-	21-/m0/s1	4	1	H28C21O5	1816.6805	516	485.2	345.77	OCC(=O)[C@@]1(O)CC[C@@H]2[C@]1(C)C[C@H](O)[C@H]1[C@H]2CCC2=CC(=O)C=C[C@]12C	13.54688	6.91063	80.67
JIWPEL01	InChI=1S/C21H28O5/c1-19-7-5-13(23)9-12(19)3-4-14-15-6-8-21(26	17(25)11-22)20(15	2)10-16(24)18(14)19/h5	7	9	14-16	18	22	24	26H	3-4	6	8	10-11H2	1-2H3/t14-	15-	16-	18+	19-	20-	21-/m0/s1	2	1	H28C21O5	904.2827	516	485.2	365.31	OCC(=O)[C@@]1(O)CC[C@@H]2[C@]1(C)C[C@H](O)[C@H]1[C@H]2CCC2=CC(=O)C=C[C@]12C	14.33062	7.38954	76.29
JUBFOB	InChI=1S/C15H14O3/c1-9(2)7-8-12-13(16)10-5-3-4-6-11(10)14(17)15(12)18/h3-7	18H	8H2	1-2H3	4	1	H14C15O3	1208.8729	411	422.7	459.09	CC(=CCC1=C(O)C(=O)c2c(C1=O)cccc2)C	11.16674	5.18892	146.48
JUBFOB01	InChI=1S/C15H14O3/c1-9(2)7-8-12-13(16)10-5-3-4-6-11(10)14(17)15(12)18/h3-7	18H	8H2	1-2H3	2	1	H14C15O3	609.4852	411	422.7	443.81	CC(=CCC1=C(O)C(=O)c2c(C1=O)cccc2)C	10.66344	5.10754	169.44
JUDRIJ	InChI=1S/C12H16N2O3S2/c13-9-11-12(10-14)19-8-6-17-4-2-15-1-3-16-5-7-18-11/h1-8H2/b12-11-	4	1	H16C12S2O3N2	1471.2304	-	448.2	354.35	N#C/C/1=C(\C#N)/SCCOCCOCCOCCS1	10.70612	5.83986	98.32
JUDRIJ01	InChI=1S/C12H16N2O3S2/c13-9-11-12(10-14)19-8-6-17-4-2-15-1-3-16-5-7-18-11/h1-8H2/b12-11-	4	1	H16S2C12O3N2	1411.7756	-	448.2	437.93	N#C/C/1=C(\C#N)/SCCOCCOCCOCCS1	11.20612	6.66727	124.76
JULBUN	InChI=1S/C8H12N4/c9-2-6-11-4-1-5-12(8-11)7-3-10/h1	4-8H2	4	1	H12C8N4	859.6115	340	381.1	436.54	N#CCN1CCCN(C1)CC#N	11.4286	7.15506	135.58
JULBUN01	InChI=1S/C8H12N4/c9-2-6-11-4-1-5-12(8-11)7-3-10/h1	4-8H2	4	1	H12C8N4	903.2679	340	381.1	390.39	N#CCN1CCCN(C1)CC#N	10.12333	5.57318	142.92
JULHED	InChI=1S/C14H10N4O4/c19-17(20)13-7-3-1-5-11(13)9-15-16-10-12-6-2-4-8-14(12)18(21)22/h1-10H	2	1	H10C14O4N4	673.8637	483	473.4	466.61	O=N(=O)c1ccccc1[CH][N][N][CH]c1ccccc1N(=O)=O	14.01141	4.62021	98.29
JULHED02	InChI=1S/C14H10N4O4/c19-17(20)13-7-3-1-5-11(13)9-15-16-10-12-6-2-4-8-14(12)18(21)22/h1-10H	2	1	H10C14O4N4	665.1137	483	473.4	472.88	O=N(=O)c1ccccc1[CH][N][N][CH]c1ccccc1N(=O)=O	12.04727	5.86668	113.32
JULZAR	InChI=1S/C8H6O2/c9-5-7-1-2-8(6-10)4-3-7/h1-6H	4	2	H6C8O2	654.8448	-	326.9	175.89	O=Cc1ccc(cc1)C=O	11.11409	2.97087	55.67
JULZAR01	InChI=1S/C8H6O2/c9-5-7-1-2-8(6-10)4-3-7/h1-6H	4	1	H6C8O2	655.2158	-	326.9	87.71	O=Cc1ccc(cc1)C=O	11.27571	1.84149	26.56
KACRUC	InChI=1S/C11H12O3/c1-11(2)8-6-4-3-5-7(8)9(12)14-10(11)13/h3-6	10	13H	1-2H3/t10-/m0/s1	4	1	H12C11O3	967.1617	-	384.6	406.53	O[C@H]1OC(=O)c2c(C1(C)C)cccc2	10.26902	5.08403	152.44
KACRUC01	InChI=1S/C11H12O3/c1-11(2)8-6-4-3-5-7(8)9(12)14-10(11)13/h3-6	10	13H	1-2H3/t10-/m0/s1	8	2	H12C11O3	1984.0647	-	384.6	420.54	O[C@H]1OC(=O)c2c(C1(C)C)cccc2	9.44427	4.93526	191.28
KADNEI	InChI=1S/C24H29N3O/c1-25(2)22-10-6-18(7-11-22)14-20-16-27(5)17-21(24(20)28)15-19-8-12-23(13-9-19)26(3)4/h6-15H	16-17H2	1-5H3/b20-14+	21-15+	4	1	H29C24ON3	2024.5441	497	502.3	347.34	CN(c1ccc(cc1)/C=C/1\CN(C)C/C(=C\c2ccc(cc2)N(C)C)/C1=O)C	11.68432	5.04341	84.18
KADNEI01	InChI=1S/C24H29N3O/c1-25(2)22-10-6-18(7-11-22)14-20-16-27(5)17-21(24(20)28)15-19-8-12-23(13-9-19)26(3)4/h6-15H	16-17H2	1-5H3/b20-14+	21-15+	4	1	H29C24ON3	2095.8303	497	502.3	317.67	CN(c1ccc(cc1)/C=C/1\CN(C)C/C(=C\c2ccc(cc2)N(C)C)/C1=O)C	9.48715	3.59961	91.23
KAHLEK	InChI=1S/C18H18N2O2/c19-17(21)15-13(11-7-3-1-4-8-11)16(18(20)22)14(15)12-9-5-2-6-10-12/h1-10	13-16H	(H2	19	21)(H2	20	22)/t13-	14-	15-	16-	4	1	H18C18O2N2	1516.7681	554	509.6	391.39	NC(=O)[C@@H]1[C@H](c2ccccc2)[C@H]([C@H]1c1ccccc1)C(=O)N	13.56335	9.03823	82.81
KAHLEK01	InChI=1S/C18H18N2O2/c19-17(21)15-13(11-7-3-1-4-8-11)16(18(20)22)14(15)12-9-5-2-6-10-12/h1-10	13-16H	(H2	19	21)(H2	20	22)/t13-	14-	15-	16-	2	1	H18C18O2N2	751.8587	554	509.6	360.58	NC(=O)[C@@H]1[C@H](c2ccccc2)[C@H]([C@H]1c1ccccc1)C(=O)N	13.31196	9.8378	75.46
KAWJAU	InChI=1S/C23H22FNO/c1-15-21-19(13-23(2	3)14-20(21)26)25(18-11-9-17(24)10-12-18)22(15)16-7-5-4-6-8-16/h4-12H	13-14H2	1-3H3	2	1	H22C23FON	934.6163	-	460.5	355.65	Fc1ccc(cc1)n1c(c2ccccc2)c(c2c1CC(C)(C)CC2=O)C	10.6509	6.44776	102.92
KAWJAU01	InChI=1S/C23H22FNO/c1-15-21-19(13-23(2	3)14-20(21)26)25(18-11-9-17(24)10-12-18)22(15)16-7-5-4-6-8-16/h4-12H	13-14H2	1-3H3	8	1	H22C23FON	3829.1556	-	460.5	367.36	Fc1ccc(cc1)n1c(c2ccccc2)c(c2c1CC(C)(C)CC2=O)C	9.41978	4.70003	125.76
KAYWIR	InChI=1S/C3H4N4O3/c1-4-3-5-2(6-10-3)7(8)9/h1H3	(H	4	5	6)	8	1	H4C3O3N4	1131.6356	399	373.5	664.43	CNc1onc(n1)N(=O)=O	12.37457	5.61751	238.04
KAYWIR01	InChI=1S/C3H4N4O3/c1-4-3-5-2(6-10-3)7(8)9/h1H3	(H	4	5	6)	4	1	H4C3O3N4	585.4539	399	373.5	543.09	CNc1onc(n1)N(=O)=O	11.13084	5.05194	218.71
KEFYOK	InChI=1S/C7H8N2O2/c1-5-3-2-4-6(7(5)8)9(10)11/h2-4H	8H2	1H3	8	2	H8C7O2N2	1447.8419	-	362.7	626.29	O=N(=O)c1cccc(c1N)C	11.24175	2.86764	299.90
KEFYOK02	InChI=1S/C7H8N2O2/c1-5-3-2-4-6(7(5)8)9(10)11/h2-4H	8H2	1H3	4	1	H8C7O2N2	715.0178	-	362.7	560.11	O=N(=O)c1cccc(c1N)C	11.75027	2.95299	202.20
KETVEK01	InChI=1S/C4H8O/c5-4-2-1-3-4/h4-5H	1-3H2	16	2	H8C4O	1791.0571	221	246	394.2474	OC1CCC1	7.31213	3.09344	366.60
KETVEK03	InChI=1S/C4H8O/c5-4-2-1-3-4/h4-5H	1-3H2	4	1	H8C4O	434.9565	221	246	428.3819	OC1CCC1	7.0683	3.81196	474.28
KETYAJ	InChI=1S/C12H14Cl2/c13-11-7-9-5-3-1-2-4-6-10(8-11)12(9)14/h7-8H	1-6H2	4	1	H14C12Cl2	1113.5311	-	354.1	456.42	Clc1cc2CCCCCCc(c1)c2Cl	9.48162	4.22718	214.36
KETYAJ01	InChI=1S/C12H14Cl2/c13-11-7-9-5-3-1-2-4-6-10(8-11)12(9)14/h7-8H	1-6H2	4	2	H14C12Cl2	1111.3823	-	354.1	496.21	Clc1cc2CCCCCCc(c1)c2Cl	9.92422	4.11065	233.89
KIDJUD01	InChI=1S/C30H22/c1-5-13-23(14-6-1)27-21-29(25-17-9-3-10-18-25)30(26-19-11-4-12-20-26)22-28(27)24-15-7-2-8-16-24/h1-22H	1	1	H22C30	516.1256	-	506.1	347.74	c1ccc(cc1)c1cc(c2ccccc2)c(cc1c1ccccc1)c1ccccc1	10.34411	5.79401	90.98
KIDJUD02	InChI=1S/C30H22/c1-5-13-23(14-6-1)27-21-29(25-17-9-3-10-18-25)30(26-19-11-4-12-20-26)22-28(27)24-15-7-2-8-16-24/h1-22H	2	1	H22C30	1042.313	-	506.1	347.35	c1ccc(cc1)c1cc(c2ccccc2)c(cc1c1ccccc1)c1ccccc1	10.29813	6.19172	90.00
KIDJUD03	InChI=1S/C30H22/c1-5-13-23(14-6-1)27-21-29(25-17-9-3-10-18-25)30(26-19-11-4-12-20-26)22-28(27)24-15-7-2-8-16-24/h1-22H	1	1	H22C30	532.1929	-	506.1	350.06	c1ccc(cc1)c1cc(c2ccccc2)c(cc1c1ccccc1)c1ccccc1	10.30912	4.33669	90.84
KIZCEC	InChI=1S/C9H13N3/c1-8(10)11-12(2)9-6-4-3-5-7-9/h3-7H	10H2	1-2H3	8	1	H13C9N3	1874.686	-	417	247.53	CN(c1ccccc1)[N]C(=[NH2])C	9.7367	5.66752	76.94
KIZCEC01	InChI=1S/C9H13N3/c1-8(10)11-12(2)9-6-4-3-5-7-9/h3-7H	10H2	1-2H3	8	1	H13C9N3	1918.8426	-	417	473.47	CN(c1ccccc1)[N]C(=[NH2])C	9.87489	4.6349	175.28
KIZMAI	InChI=1S/C13H16N2S2/c1-14-9-11(15(2)13(17)12(14)16)8-10-6-4-3-5-7-10/h3-7	11H	8-9H2	1-2H3/t11-/m0/s1	4	1	H16S2C13N2	1329.7225	422	450.6	387	CN1[C@H](CN(C(=S)C1=S)C)Cc1ccccc1	11.27245	7.20709	103.85
KIZMAI01	InChI=1S/C13H16N2S2/c1-14-9-11(15(2)13(17)12(14)16)8-10-6-4-3-5-7-10/h3-7	11H	8-9H2	1-2H3/t11-/m0/s1	4	2	H16S2C13N2	1394.3201	422	450.6	377.51	CN1[C@H](CN(C(=S)C1=S)C)Cc1ccccc1	10.52614	5.0904	118.51
LABJON	InChI=1S/C8H6N4O5/c13-6-4-11(8(14)10-6)9-3-5-1-2-7(17-5)12(15)16/h1-3H	4H2	(H	10	13	14)/b9-3+	4	1	H6C8O5N4	986.0975	-	478.7	502.77	O=C1NC(=O)N(C1)/N=C/c1ccc(o1)N(=O)=O	14.81243	5.57373	115.22
LABJON01	InChI=1S/C8H6N4O5/c13-6-4-11(8(14)10-6)9-3-5-1-2-7(17-5)12(15)16/h1-3H	4H2	(H	10	13	14)/b9-3+	2	1	H6C8O5N4	493.774	-	478.7	510.01	O=C1NC(=O)N(C1)/N=C/c1ccc(o1)N(=O)=O	13.85507	5.56193	129.17
LAGWOH	InChI=1S/C11H4O2S3/c12-7-5-3-1-2-4-6(5)8(13)10-9(7)15-11(14)16-10/h1-4H	2	1	H4C11S3O2	521.0794	-	447	515.22	S=c1sc2c(s1)C(=O)c1c(C2=O)cccc1	10.93234	4.52159	180.01
LAGWOH01	InChI=1S/C11H4O2S3/c12-7-5-3-1-2-4-6(5)8(13)10-9(7)15-11(14)16-10/h1-4H	4	1	H4S3C11O2	1038.638	-	447	473.59	S=c1sc2c(s1)C(=O)c1c(C2=O)cccc1	11.20295	3.93514	153.41
LEBGEE01	InChI=1S/C9H10N4O4/c1-6(2)10-11-8-4-3-7(12(14)15)5-9(8)13(16)17/h3-5	11H	1-2H3	8	2	H10C9O4N4	2169.0459	400	406.1	530.57	CC(=NNc1ccc(cc1N(=O)=O)N(=O)=O)C	12.01771	4.47783	168.40
LEBGEE02	InChI=1S/C9H10N4O4/c1-6(2)10-11-8-4-3-7(12(14)15)5-9(8)13(16)17/h3-5	11H	1-2H3	2	1	H10C9O4N4	540.2779	400	406.1	472.45	CC(=NNc1ccc(cc1N(=O)=O)N(=O)=O)C	11.5482	4.98549	193.84
LEPRON	InChI=1S/C19H34/c1-4-10-16(11-5-1)19(17-12-6-2-7-13-17)18-14-8-3-9-15-18/h16-19H	1-15H2	8	1	H34C19	3370.3606	328	352.7	298.81	C1CCC(CC1)C(C1CCCCC1)C1CCCCC1	8.358	4.86025	141.57
LEPRON01	InChI=1S/C19H34/c1-4-10-16(11-5-1)19(17-12-6-2-7-13-17)18-14-8-3-9-15-18/h16-19H	1-15H2	4	1	H34C19	1670.5502	328	352.7	326.28	C1CCC(CC1)C(C1CCCCC1)C1CCCCC1	9.07884	5.68322	141.76
LEQKEY	InChI=1S/C6H12O5/c1-6(10)5(9)4(8)3(7)2-11-6/h3-5	7-10H	2H2	1H3/t3-	4+	5+	6+/m1/s1	4	1	H12C6O5	734.7505	415	410.5	468.76	O[C@@H]1CO[C@]([C@H]([C@H]1O)O)(C)O	15.52363	9.68827	91.44
LEQKEY01	InChI=1S/C6H12O5/c1-6(10)5(9)4(8)3(7)2-11-6/h3-5	7-10H	2H2	1H3/t3-	4+	5+	6+/m1/s1	4	1	H12C6O5	706.4297	415	410.5	513.16	O[C@@H]1CO[C@]([C@H]([C@H]1O)O)(C)O	17.49132	13.08967	86.98
LEQPIH	InChI=1S/C12H8N4O/c1-3-7-13-9(5-1)11-15-16-12(17-11)10-6-2-4-8-14-10/h1-8H	4	2	H8C12ON4	1054.1533	427	429	516.69	c1ccc(nc1)c1nnc(o1)c1ccccn1	10.31463	3.80679	205.17
LEQPIH01	InChI=1S/C12H8N4O/c1-3-7-13-9(5-1)11-15-16-12(17-11)10-6-2-4-8-14-10/h1-8H	4	2	H8C12ON4	1064.9068	427	429	492.1	c1ccc(nc1)c1nnc(o1)c1ccccn1	10.68974	3.45102	192.06
LESFOF	InChI=1S/C8H7N3O5/c1-5(12)9-7-3-2-6(10(13)14)4-8(7)11(15)16/h2-4H	1H3	(H	9	12)	4	1	H7C8O5N3	951.2559	-	432.2	504.67	CC(=O)Nc1ccc(cc1N(=O)=O)N(=O)=O	12.73674	4.64049	138.81
LESFOF01	InChI=1S/C8H7N3O5/c1-5(12)9-7-3-2-6(10(13)14)4-8(7)11(15)16/h2-4H	1H3	(H	9	12)	4	1	H7C8O5N3	930.625	-	432.2	551.55	CC(=O)Nc1ccc(cc1N(=O)=O)N(=O)=O	13.16778	5.95374	148.83
LHISTD04	InChI=1S/C6H9N3O2/c7-5(6(10)11)1-4-2-8-3-9-4/h2-3	5H	1H2	7H3	(H	8	9)/t5-/m0/s1	2	1	H9C6O2N3	367.3578	-	512.5	500.04	[NH3][C@H](C(=O)[O])Cc1c[nH]cn1	19.97006	9.92269	90.23
LHISTD13	InChI=1S/C6H9N3O2/c7-5(6(10)11)1-4-2-8-3-9-4/h2-3	5H	1H2	7H3	(H	8	9)/t5-/m0/s1	4	1	H9C6O2N3	723.0631	-	512.5	543.72	[NH3][C@H](C(=O)[O])Cc1c[nH]cn1	18.34755	10.33633	108.29
LIKBOW	InChI=1S/C14H15NO2/c1-15(2)9-6-7-11-10-4-3-5-12(10)14(16)17-13(11)8-9/h6-8H	3-5H2	1-2H3	8	1	H15C14O2N	2332.3051	-	407.1	476.24	CN(c1ccc2c(c1)oc(=O)c1c2CCC1)C	10.45032	4.23224	181.14
LIKBOW01	InChI=1S/C14H15NO2/c1-15(2)9-6-7-11-10-4-3-5-12(10)14(16)17-13(11)8-9/h6-8H	3-5H2	1-2H3	4	1	H15C14O2N	1181.5995	-	407.1	472.65	CN(c1ccc2c(c1)oc(=O)c1c2CCC1)C	10.45011	3.45918	176.30
LILJUL	InChI=1S/C15H10N2O6/c18-16(19)12-5-4-11(13(8-12)17(20)21)3-1-10-2-6-14-15(7-10)23-9-22-14/h1-8H	9H2/b3-1+	8	2	H10C15O6N2	2692.5668	421	472.3	640.13	O=N(=O)c1cc(ccc1/C=C/c1ccc2c(c1)OCO2)N(=O)=O	13.85627	4.67485	191.48
LILJUL01	InChI=1S/C15H10N2O6/c18-16(19)12-5-4-11(13(8-12)17(20)21)3-1-10-2-6-14-15(7-10)23-9-22-14/h1-8H	9H2/b3-1+	4	1	H10C15O6N2	1357.8943	421	472.3	510.19	O=N(=O)c1cc(ccc1/C=C/c1ccc2c(c1)OCO2)N(=O)=O	13.40468	3.89468	125.39
LIYTIW	InChI=1S/C20H14N4/c1-2-6-16-15(5-1)21-19(22-16)13-9-11-14(12-10-13)20-23-17-7-3-4-8-18(17)24-20/h1-12H	(H	21	22)(H	23	24)	4	1	H14C20N4	1540.1609	-	528.1	30.88	c1ccc2c(c1)[nH]c(n2)c1ccc(cc1)c1nc2c([nH]1)cccc2	9.82671	3.69337	7.05
LIYTIW01	InChI=1S/C20H14N4/c1-2-6-16-15(5-1)21-19(22-16)13-9-11-14(12-10-13)20-23-17-7-3-4-8-18(17)24-20/h1-12H	(H	21	22)(H	23	24)	2	1	H14C20N4	768.531	-	528.1	31.82	c1ccc2c(c1)[nH]c(n2)c1ccc(cc1)c1nc2c([nH]1)cccc2	9.68916	3.84004	7.16
LOLYUG	InChI=1S/C18H14O/c19-18-15-8-4-2-6-13(15)11-17(18)16-10-9-12-5-1-3-7-14(12)16/h1-8H	9-11H2/b17-16+	2	1	H14C18O	642.1063	415	413.9	457.19	O=C1/C(=C/2\CCc3c2cccc3)/Cc2c1cccc2	10.29539	3.45461	175.95
LOLYUG01	InChI=1S/C18H14O/c19-18-15-8-4-2-6-13(15)11-17(18)16-10-9-12-5-1-3-7-14(12)16/h1-8H	9-11H2/b17-16+	8	2	H14C18O	2588.4282	415	413.9	480.54	O=C1/C(=C/2\CCc3c2cccc3)/Cc2c1cccc2	10.29623	3.76024	188.27
MALEHY01	InChI=1S/C4H4N2O2/c7-3-1-2-4(8)6-5-3/h1-2H	(H	5	7)(H	6	8)	4	1	H4C4O2N2	469.8419	307	393.7	76.5	Oc1ccc(=O)[nH]n1	13.11499	5.48488	19.53
MALEHY10	InChI=1S/C4H4N2O2/c7-3-1-2-4(8)6-5-3/h1-2H	(H	5	7)(H	6	8)	2	1	H4C4O2N2	235.7303	307	393.7	107.1	Oc1ccc(=O)[nH]n1	14.37774	6.05599	24.47
MALEHY12	InChI=1S/C4H4N2O2/c7-3-1-2-4(8)6-5-3/h1-2H	(H	5	7)(H	6	8)	4	1	H4C4O2N2	481.5379	307	393.7	103.07	Oc1ccc(=O)[nH]n1	14.0746	5.37287	23.88
MALIAC12	InChI=1S/C4H4O4/c5-3(6)1-2-4(7)8/h1-2H	(H	5	6)(H	7	8)/b2-1-	4	1	H4C4O4	479.5859	-	360.2	597.74	OC(=O)/C=C\C(=O)O	13.17077	5.43218	205.99
MALIAC13	InChI=1S/C4H4O4/c5-3(6)1-2-4(7)8/h1-2H	(H	5	6)(H	7	8)/b2-1-	2	1	H4C4O4	234.9312	-	360.2	669.65	OC(=O)/C=C\C(=O)O	14.03198	6.42932	240.96
MAVGEW	InChI=1S/C15H11N3O2/c19-14(10-6-2-1-3-7-10)18-17-13-11-8-4-5-9-12(11)16-15(13)20/h1-9H	(H	18	19)(H	16	17	20)	4	1	H11C15O2N3	1274.7158	-	481.4	415.6	O=C(c1ccccc1)N/N=C/1\C(=O)Nc2c1cccc2	10.53427	4.42759	124.43
MAVGEW01	InChI=1S/C15H11N3O2/c19-14(10-6-2-1-3-7-10)18-17-13-11-8-4-5-9-12(11)16-15(13)20/h1-9H	(H	18	19)(H	16	17	20)	4	1	H11C15O2N3	1251.9465	-	481.4	442.98	O=C(c1ccccc1)N/N=C/1\C(=O)Nc2c1cccc2	12.61676	3.89487	104.78
MBLARA01	InChI=1S/C6H12O5/c1-10-6-5(9)4(8)3(7)2-11-6/h3-9H	2H2	1H3/t3-	4-	5+	6-/m0/s1	2	1	H12C6O5	377.7662	-	380.2	440.74	CO[C@H]1OC[C@@H]([C@@H]([C@H]1O)O)O	12.15183	7.92223	141.31
MBLARA10	InChI=1S/C6H12O5/c1-10-6-5(9)4(8)3(7)2-11-6/h3-9H	2H2	1H3/t3-	4-	5+	6-/m0/s1	4	1	H12C6O5	764.5247	-	380.2	438.28	CO[C@H]1OC[C@@H]([C@@H]([C@H]1O)O)O	12.19801	6.86594	133.84
MBPHOL01	InChI=1S/C15H24O/c1-10-8-11(14(2	3)4)13(16)12(9-10)15(5	6)7/h8-9	16H	1-7H3	8	1	H24C15O	2680.001	343	364.6	370.25	Cc1cc(c(c(c1)C(C)(C)C)O)C(C)(C)C	8.62006	5.16432	174.06
MBPHOL12	InChI=1S/C15H24O/c1-10-8-11(14(2	3)4)13(16)12(9-10)15(5	6)7/h8-9	16H	1-7H3	4	1	H24C15O	1381.7636	343	364.6	386.77	Cc1cc(c(c(c1)C(C)(C)C)O)C(C)(C)C	9.11027	4.18748	186.07
MEBQEQ	InChI=1S/C4H4FN3O/c5-2-1-7-4(9)8-3(2)6/h1H	(H3	6	7	8	9)	4	1	H4C4FON3	530.4117	-	399.3	502.85	Nc1nc(=O)[nH]cc1F	12.20543	5.78551	189.01
MEBQEQ01	InChI=1S/C4H4FN3O/c5-2-1-7-4(9)8-3(2)6/h1H	(H3	6	7	8	9)	8	1	H4C4FON3	1086.8611	-	399.3	563.35	Nc1nc(=O)[nH]cc1F	12.6375	4.69726	167.83
MEHROH	InChI=1S/C15H11NO2/c17-14-12-8-4-5-9-13(12)16(15(14)18)10-11-6-2-1-3-7-11/h1-9H	10H2	4	1	H11C15O2N	1180.248	399	426.4	423.52	O=C1C(=O)c2c(N1Cc1ccccc1)cccc2	10.71162	5.16201	128.81
MEHROH01	InChI=1S/C15H11NO2/c17-14-12-8-4-5-9-13(12)16(15(14)18)10-11-6-2-1-3-7-11/h1-9H	10H2	2	1	H11C15O2N	590.2553	399	426.4	459.82	O=C1C(=O)c2c(N1Cc1ccccc1)cccc2	10.60398	6.71122	153.67
MNPHOL02	InChI=1S/C6H5NO3/c8-6-3-1-2-5(4-6)7(9)10/h1-4	8H	4	1	H5C6O3N	622.3241	370	352	398.98	Oc1cccc(c1)N(=O)=O	12.55938	4.74963	136.13
MNPHOL03	InChI=1S/C6H5NO3/c8-6-3-1-2-5(4-6)7(9)10/h1-4	8H	4	1	H5C6O3N	619.3056	370	352	388.25	Oc1cccc(c1)N(=O)=O	12.61617	5.18328	129.12
MORVAR	InChI=1S/C8H9NO2/c10-6-8(11)9-7-4-2-1-3-5-7/h1-5	10H	6H2	(H	9	11)	4	1	H9C8O2N	762.7829	-	385.8	499.54	OCC(=O)Nc1ccccc1	10.68342	5.07283	201.73
MORVAR01	InChI=1S/C8H9NO2/c10-6-8(11)9-7-4-2-1-3-5-7/h1-5	10H	6H2	(H	9	11)	8	1	H9C8O2N	1575.5715	-	385.8	373.99	OCC(=O)Nc1ccccc1	9.65453	3.55396	142.98
MPTRZS	InChI=1S/C9H9N3S/c1-11-7-9(13)12(10-11)8-5-3-2-4-6-8/h2-7H	1H3	4	1	H9SC9N3	920.5416	374	421.9	448.24	CN1[N]N(C(=S)[CH]1)c1ccccc1	10.63739	4.90197	157.88
MPTRZS01	InChI=1S/C9H9N3S/c1-11-7-9(13)12(10-11)8-5-3-2-4-6-8/h2-7H	1H3	4	1	H9SC9N3	946.0418	374	421.9	385.12	CN1[N]N(C(=S)[CH]1)c1ccccc1	10.63164	5.33405	115.06
MTPETA	InChI=1S/C16H16S2/c1-17-15(13-9-5-3-6-10-13)16(18-2)14-11-7-4-8-12-14/h3-12H	1-2H3/b16-15+	2	2	H16S2C16	713.0365	419	406.9	413.76	CS/C(=C(\c1ccccc1)/SC)/c1ccccc1	10.75697	6.65402	132.89
MTPETA01	InChI=1S/C16H16S2/c1-17-15(13-9-5-3-6-10-13)16(18-2)14-11-7-4-8-12-14/h3-12H	1-2H3/b16-15+	2	1	H16S2C16	690.6508	419	406.9	417.43	CS/C(=C(\c1ccccc1)/SC)/c1ccccc1	12.31609	6.84685	114.12
MUYROO	InChI=1S/C12H8F2N2O2/c13-8-4-1-5-9(10(8)14)16-11-7(12(17)18)3-2-6-15-11/h1-6H	(H	15	16)(H	17	18)	4	1	H8C12F2O2N2	1118.9984	-	416.5	392.15	OC(=O)c1cccnc1Nc1cccc(c1F)F	9.90424	4.13442	150.78
MUYROO01	InChI=1S/C12H8F2N2O2/c13-8-4-1-5-9(10(8)14)16-11-7(12(17)18)3-2-6-15-11/h1-6H	(H	15	16)(H	17	18)	2	1	H8C12F2O2N2	551.6754	-	416.5	390.43	OC(=O)c1cccnc1Nc1cccc(c1F)F	9.71827	4.17166	161.85
MUYROO02	InChI=1S/C12H8F2N2O2/c13-8-4-1-5-9(10(8)14)16-11-7(12(17)18)3-2-6-15-11/h1-6H	(H	15	16)(H	17	18)	2	1	H8C12F2O2N2	549.1649	-	416.5	397.88	OC(=O)c1cccnc1Nc1cccc(c1F)F	10.71285	4.77685	145.92
NAVGAT	InChI=1S/C13H14O6/c14-7-10-8(15)12-9(16)11(7)18-13(17-10	19-12)6-4-2-1-3-5-6/h1-5	7-12	14-16H/t7-	8-	9-	10-	11+	12-	13+	4	1	H14C13O6	1210.874	483	436.7	404.31	O[C@@H]1[C@@H]2O[C@@]3(O[C@H]1[C@@H]([C@H]([C@@H]2O)O3)O)c1ccccc1	11.98576	7.56115	108.88
NAVGAT01	InChI=1S/C13H14O6/c14-7-10-8(15)12-9(16)11(7)18-13(17-10	19-12)6-4-2-1-3-5-6/h1-5	7-12	14-16H/t7-	8-	9-	10-	11+	12-	13+	4	1	H14C13O6	1196.7149	483	436.7	425.82	O[C@@H]1[C@@H]2O[C@@]3(O[C@H]1[C@@H]([C@H]([C@@H]2O)O3)O)c1ccccc1	12.55222	8.42001	116.15
NAXDIZ	InChI=1S/C14H10N2O/c1-3-7-11(8-4-1)13-15-16-14(17-13)12-9-5-2-6-10-12/h1-10H	4	1	H10C14ON2	1131.1071	412	414	413.74	c1ccc(cc1)c1nnc(o1)c1ccccc1	8.35416	3.35605	194.57
NAXDIZ04	InChI=1S/C14H10N2O/c1-3-7-11(8-4-1)13-15-16-14(17-13)12-9-5-2-6-10-12/h1-10H	24	6	H10C14ON2	6782.952	412	414	482.51	c1ccc(cc1)c1nnc(o1)c1ccccc1	10.14787	3.48349	176.82
NAXFUO	InChI=1S/C9H13NO3/c1-9(2	3)13-8(12)10-6-4-5-7(10)11/h4-5H	6H2	1-3H3	8	2	H13C9O3N	2034.0857	-	373.7	497.31	O=C(N1CC=CC1=O)OC(C)(C)C	9.73087	4.82647	242.52
NAXFUO01	InChI=1S/C9H13NO3/c1-9(2	3)13-8(12)10-6-4-5-7(10)11/h4-5H	6H2	1-3H3	4	1	H13C9O3N	1031.393	-	373.7	444.05	O=C(N1CC=CC1=O)OC(C)(C)C	9.15678	4.38698	212.46
NAYNUX	InChI=1S/C6H6N8O10/c15-11(16)7-1-3-10(14(21)22)4-2(7)9(13(19)20)6(24-4)5(23-3)8(1)12(17)18/h1-6H/t1-	2+	3+	4-	5+	6-	2	1	H6C6O10N8	595.7196	-	468.1	524.02	O=N(=O)N1[C@@H]2O[C@@H]3[C@H]1N(N(=O)=O)[C@@H]1N([C@H]2O[C@@H]1N3N(=O)=O)N(=O)=O	15.67305	8.26899	96.62
NAYNUX01	InChI=1S/C6H6N8O10/c15-11(16)7-1-3-10(14(21)22)4-2(7)9(13(19)20)6(24-4)5(23-3)8(1)12(17)18/h1-6H/t1-	2+	3+	4-	5+	6-	3	1	H6C6O10N8	882.1655	-	468.1	550.71	O=N(=O)N1[C@@H]2O[C@@H]3[C@H]1N(N(=O)=O)[C@@H]1N([C@H]2O[C@@H]1N3N(=O)=O)N(=O)=O	17.14257	12.0858	88.95
NBZOAC02	InChI=1S/C7H5NO4/c9-7(10)5-1-3-6(4-2-5)8(11)12/h1-4H	(H	9	10)	4	1	H5C7O4N	694.1482	511	391.6	743.28	OC(=O)c1ccc(cc1)N(=O)=O	12.60129	4.32228	271.28
NBZOAC05	InChI=1S/C7H5NO4/c9-7(10)5-1-3-6(4-2-5)8(11)12/h1-4H	(H	9	10)	8	1	H5C7O4N	1382.0166	511	391.6	701.79	OC(=O)c1ccc(cc1)N(=O)=O	16.96438	5.17365	170.40
NDOCLH01	InChI=1S/C18H18ClN3O/c1-21-8-10-22(11-9-21)18-14-12-13(19)6-7-16(14)23-17-5-3-2-4-15(17)20-18/h2-7	12H	8-11H2	1H3	4	1	H18C18ClON3	1659.7966	-	441.9	404.32	CN1CCN(CC1)C1=Nc2ccccc2Oc2c1cc(Cl)cc2	9.64408	3.57056	139.19
NDOCLH10	InChI=1S/C18H18ClN3O/c1-21-8-10-22(11-9-21)18-14-12-13(19)6-7-16(14)23-17-5-3-2-4-15(17)20-18/h2-7	12H	8-11H2	1H3	8	1	H18C18N3OCl	3303.4163	-	441.9	403.17	CN1CCN(CC1)C1=Nc2ccccc2Oc2c1cc(Cl)cc2	9.62456	5.82491	137.00
NENJOF	InChI=1S/2C9H8N2/c2*1-2-4-8(5-3-1)9-6-10-7-11-9/h2*1-7H	(H	10	11)	4	2	H8C9N2	812.4024	403	386.8	413.86	c1ccc(cc1)c1c[nH]cn1.c1ccc(cc1)c1c[nH]cn1	9.78213	2.22256	175.70
NENJOF03	InChI=1S/C9H8N2/c1-2-4-8(5-3-1)9-6-10-7-11-9/h1-7H	(H	10	11)	18	1	H8C9N2	3706.982	403	386.8	136.88	c1ccc(cc1)c1c[nH]cn1	10.57562	5.39506	39.08
NICOAM03	InChI=1S/C6H6N2O/c7-6(9)5-2-1-3-8-4-5/h1-4H	(H2	7	9)	4	1	H6C6ON2	585.6595	379	381	469.48	NC(=O)c1cccnc1	11.99218	5.16391	181.89
NICOAM04	InChI=1S/C6H6N2O/c7-6(9)5-2-1-3-8-4-5/h1-4H	(H2	7	9)	16	4	H6C6ON2	2455.3978	379	381	440.8	NC(=O)c1cccnc1	11.82462	4.0618	159.62
NIFHIT	InChI=1S/C5H6N2O2S/c1-3(8)7-2-4(9)6-5(7)10/h2H2	1H3	(H	6	9	10)	4	1	H6SC5O2N2	667.6719	-	420.5	602.69	O=C1NC(=S)N(C1)C(=O)C	13.01448	5.51452	174.12
NIFHIT01	InChI=1S/C5H6N2O2S/c1-3(8)7-2-4(9)6-5(7)10/h2H2	1H3	(H	6	9	10)	2	1	H6SC5O2N2	342.2689	-	420.5	537.42	O=C1NC(=S)N(C1)C(=O)C	13.80906	6.64392	175.77
NIMFOE	InChI=1S/C4H3N3O4/c8-3-2(7(10)11)1-5-4(9)6-3/h1H	(H2	5	6	8	9)	4	1	H3C4O4N3	583.1392	-	445.8	651.49	O=N(=O)c1c[nH]c(=O)[nH]c1=O	16.30332	5.66823	135.59
NIMFOE01	InChI=1S/C4H3N3O4/c8-3-2(7(10)11)1-5-4(9)6-3/h1H	(H2	5	6	8	9)	8	1	H3C4O4N3	1203.6381	-	445.8	673.41	O=N(=O)c1c[nH]c(=O)[nH]c1=O	14.98618	6.43799	147.46
NIMFOE02	InChI=1S/C4H3N3O4/c8-3-2(7(10)11)1-5-4(9)6-3/h1H	(H2	5	6	8	9)	4	1	H3C4O4N3	584.7997	-	445.8	665.03	O=N(=O)c1c[nH]c(=O)[nH]c1=O	17.16584	4.88429	132.00
NIPSOV	InChI=1S/C20H13NO2S/c22-21(23)19-17-12-6-4-10-15(17)16-11-5-7-13-18(16)20(19)24-14-8-2-1-3-9-14/h1-13H	4	1	H13C20SO2N	1589.2704	-	475	411.23	O=N(=O)c1c(Sc2ccccc2)c2ccccc2c2c1cccc2	10.58843	5.3914	113.36
NIPSOV01	InChI=1S/C20H13NO2S/c22-21(23)19-17-12-6-4-10-15(17)16-11-5-7-13-18(16)20(19)24-14-8-2-1-3-9-14/h1-13H	4	1	H13C20SO2N	1589.4988	-	475	452.79	O=N(=O)c1c(Sc2ccccc2)c2ccccc2c2c1cccc2	7.77017	2.43642	212.76
NITPOL02	InChI=1S/C6H5NO3/c8-6-3-1-5(2-4-6)7(9)10/h1-4	8H	4	1	H5C6O3N	619.2838	384	351.5	499.21	Oc1ccc(cc1)N(=O)=O	10.84734	3.67252	221.85
NITPOL03	InChI=1S/C6H5NO3/c8-6-3-1-5(2-4-6)7(9)10/h1-4	8H	4	1	H5C6O3N	619.5206	384	351.5	561.74	Oc1ccc(cc1)N(=O)=O	10.38281	2.29394	273.00
NIVPAJ	InChI=1S/C7H8N2O3/c8-6-3-5(4-10)1-2-7(6)9(11)12/h1-3	10H	4	8H2	2	1	H8C7O3N2	364.8035	412	401.1	605.15	OCc1ccc(c(c1)N)N(=O)=O	14.69593	6.6345	179.54
NIVPAJ01	InChI=1S/C7H8N2O3/c8-6-3-5(4-10)1-2-7(6)9(11)12/h1-3	10H	4	8H2	8	1	H8C7O3N2	1498.1771	412	401.1	521.36	OCc1ccc(c(c1)N)N(=O)=O	12.67249	5.26428	140.08
NIYDUU	InChI=1S/C4N10O/c5-11-7-1-3-8-12-13-14(3)4-2(6-1)9-15-10-4	4	1	C4ON10	758.4068	361	439	418.79	[N]=[N]=Nc1nc2nonc2n2c1nnn2	8.41244	3.90874	146.66
NIYDUU01	InChI=1S/C4N10O/c5-11-7-1-3-8-12-13-14(3)4-2(6-1)9-15-10-4	8	2	C4ON10	1525.8514	361	439	604.26	[N]=[N]=Nc1nc2nonc2n2c1nnn2	9.79963	2.8628	248.25
NIZVAU	InChI=1S/C8H4FNO2/c9-5-3-1-2-4-6(5)10-8(12)7(4)11/h1-3H	(H	10	11	12)	4	1	H4C8NO2F	720.8582	-	389.1	506.06	O=C1Nc2c(C1=O)cccc2F	10.73807	3.84024	211.30
NIZVAU01	InChI=1S/C8H4FNO2/c9-5-3-1-2-4-6(5)10-8(12)7(4)11/h1-3H	(H	10	11	12)	4	2	H4C8NO2F	704.6551	-	389.1	580.55	O=C1Nc2c(C1=O)cccc2F	11.26769	4.40142	233.83
NIZVAU02	InChI=1S/C8H4FNO2/c9-5-3-1-2-4-6(5)10-8(12)7(4)11/h1-3H	(H	10	11	12)	8	2	H4C8NO2F	1441.8727	-	389.1	582.42	O=C1Nc2c(C1=O)cccc2F	10.41763	3.82686	309.42
NMZNON	InChI=1S/C9H13N3O5/c1-10-5-8(11(14)15)2-7(13)3-9(4-8	6-10)12(16)17/h2-6H2	1H3/t8-	9+	4	1	H13C9O5N3	1099.7874	-	409.1	461.98	CN1C[C@@]2(CC(=O)C[C@](C1)(C2)N(=O)=O)N(=O)=O	10.69975	6.32584	180.66
NMZNON01	InChI=1S/C9H13N3O5/c1-10-5-8(11(14)15)2-7(13)3-9(4-8	6-10)12(16)17/h2-6H2	1H3/t8-	9+	8	1	H13C9O5N3	2197.1175	-	409.1	485.42	CN1C[C@@]2(CC(=O)C[C@](C1)(C2)N(=O)=O)N(=O)=O	12.57805	6.13675	133.26
NOETNA	InChI=1S/C4H4N8O14/c13-6(14)3(7(15)16	8(17)18)1-5(12(25)26)2-4(9(19)20	10(21)22)11(23)24/h1-2H2	4	1	H4C4O14N8	1309.9876	368	438.3	372.06	O=N(=O)N(CC(N(=O)=O)(N(=O)=O)N(=O)=O)CC(N(=O)=O)(N(=O)=O)N(=O)=O	14.29024	3.07434	73.45
NOETNA01	InChI=1S/C4H4N8O14/c13-6(14)3(7(15)16	8(17)18)1-5(12(25)26)2-4(9(19)20	10(21)22)11(23)24/h1-2H2	4	1	H4C4O14N8	1265.4713	368	438.3	405.04	O=N(=O)N(CC(N(=O)=O)(N(=O)=O)N(=O)=O)CC(N(=O)=O)(N(=O)=O)N(=O)=O	16.17813	11.4769	72.15
NOGUNA	InChI=1S/C2H5N5O3/c1-6(5-8)2(3)4-7(9)10/h1H3	(H2	3	4)	8	2	H5C2O3N5	1184.5234	-	373.7	731.21	[O][N]N(/C(=N/N(=O)=O)/N)C	13.08681	6.21429	239.47
NOGUNA01	InChI=1S/C2H5N5O3/c1-6(5-8)2(3)4-7(9)10/h1H3	(H2	3	4)	8	1	H5C2O3N5	1247.7859	-	373.7	561.6	[O][N]N(/C(=N/N(=O)=O)/N)C	10.74149	3.86113	200.23
NONFOM	InChI=1S/C13H10N2O/c16-12-6-2-1-5-10(12)11-9-15-8-4-3-7-13(15)14-11/h1-9	16H	8	1	H10C13ON2	2104.8546	415	416.2	509.0785	Oc1ccccc1c1nc2n(c1)cccc2	9.75791	2.52238	211.30
NONFOM01	InChI=1S/C13H10N2O/c16-12-6-2-1-5-10(12)11-9-15-8-4-3-7-13(15)14-11/h1-9	16H	8	2	H10C13ON2	2050.6293	415	416.2	520.8477	Oc1ccccc1c1nc2n(c1)cccc2	9.92087	2.47281	314.57
NOSWAT	InChI=1S/C14H10N2O2/c17-13-11-8-4-5-9-12(11)14(18)16(13)15-10-6-2-1-3-7-10/h1-9	15H	8	2	H10C14O2N2	2339.2218	457	448.7	483.88	O=C1N(Nc2ccccc2)C(=O)c2c1cccc2	11.11355	4.56769	148.16
NOSWAT01	InChI=1S/C14H10N2O2/c17-13-11-8-4-5-9-12(11)14(18)16(13)15-10-6-2-1-3-7-10/h1-9	15H	4	1	H10C14O2N2	1158.9776	457	448.7	446.73	O=C1N(Nc2ccccc2)C(=O)c2c1cccc2	10.78897	5.40963	135.24
NOTSAQ	InChI=1S/C8H7N3S/c9-8-11-10-7(12-8)6-4-2-1-3-5-6/h1-5H	(H2	9	11)	4	1	H7SC8N3	833.6902	496	422.5	353.1	Nc1nnc(s1)c1ccccc1	12.94862	4.31061	85.61
NOTSAQ01	InChI=1S/C8H7N3S/c9-8-11-10-7(12-8)6-4-2-1-3-5-6/h1-5H	(H2	9	11)	4	1	H7SC8N3	833.5341	496	422.5	356.06	Nc1nnc(s1)c1ccccc1	12.90466	4.31575	87.12
NTBZAM01	InChI=1S/C7H6N2O3/c8-7(10)5-1-3-6(4-2-5)9(11)12/h1-4H	(H2	8	10)	4	1	H6C7O3N2	714.21	473	417.2	680.72	NC(=O)c1ccc(cc1)N(=O)=O	15.04627	4.94006	175.12
NTBZAM10	InChI=1S/C7H6N2O3/c8-7(10)5-1-3-6(4-2-5)9(11)12/h1-4H	(H2	8	10)	4	1	H6C7O3N2	713.9535	473	417.2	679.42	NC(=O)c1ccc(cc1)N(=O)=O	15.0391	4.94411	174.05
NTBZAM11	InChI=1S/C7H6N2O3/c8-7(10)5-1-3-6(4-2-5)9(11)12/h1-4H	(H2	8	10)	4	1	H6C7O3N2	726.8116	473	417.2	645.85	NC(=O)c1ccc(cc1)N(=O)=O	14.47516	6.05919	178.59
NUDGEZ	InChI=1S/C19H22O10S/c1-9-5-7-12(8-6-9)30(22	23)29-18-16-13(24-10(2)20)15-14(25-11(3)21)17(18)28-19(4	26-15)27-16/h5-8	13-18H	1-4H3/t13-	14-	15-	16+	17-	18-	19+/m1/s1	2	1	H22SC19O10	994.8074	-	492.4	364.07	CC(=O)O[C@H]1[C@@H]2O[C@@]3(O[C@H]1[C@H]([C@H]([C@@H]2OS(=O)(=O)c1ccc(cc1)C)O3)OC(=O)C)C	12.8373	8.55181	75.24
NUDGEZ01	InChI=1S/C19H22O10S/c1-9-5-7-12(8-6-9)30(22	23)29-18-16-13(24-10(2)20)15-14(25-11(3)21)17(18)28-19(4	26-15)27-16/h5-8	13-18H	1-4H3/t13-	14-	15-	16+	17-	18-	19+/m1/s1	4	1	H22SC19O10	1979.1216	-	492.4	362.51	CC(=O)O[C@H]1[C@@H]2O[C@@]3(O[C@H]1[C@H]([C@H]([C@@H]2OS(=O)(=O)c1ccc(cc1)C)O3)OC(=O)C)C	13.66917	8.85248	70.58
NUJTUI	InChI=1S/C25H20O4S2/c1-14-20(26)16-8-3-5-10-18(16)22(28)24(14)30-12-7-13-31-25-15(2)21(27)17-9-4-6-11-19(17)23(25)29/h3-6	8-11H	7	12-13H2	1-2H3	2	1	H20S2C25O4	1032.4893	-	548.2	324.61	CC1=C(SCCCSC2=C(C)C(=O)c3c(C2=O)cccc3)C(=O)c2c(C1=O)cccc2	11.72579	8.02282	68.58
NUJTUI01	InChI=1S/C25H20O4S2/c1-14-20(26)16-8-3-5-10-18(16)22(28)24(14)30-12-7-13-31-25-15(2)21(27)17-9-4-6-11-19(17)23(25)29/h3-6	8-11H	7	12-13H2	1-2H3	8	1	H20S2C25O4	4218.2422	-	548.2	174.2	CC1=C(SCCCSC2=C(C)C(=O)c3c(C2=O)cccc3)C(=O)c2c(C1=O)cccc2	10.32158	6.38457	37.57
OBIDOS	InChI=1S/C8H5Cl3N2O3/c9-8(10	11)7(14)12-5-2-1-3-6(4-5)13(15)16/h1-4H	(H	12	14)	4	2	H5C8Cl3O3N2	1113.8287	378	432.8	386.42	O=C(C(Cl)(Cl)Cl)Nc1cccc(c1)N(=O)=O	10.47711	4.17734	115.46
OBIDOS01	InChI=1S/C8H5Cl3N2O3/c9-8(10	11)7(14)12-5-2-1-3-6(4-5)13(15)16/h1-4H	(H	12	14)	8	1	H5C8Cl3O3N2	2290.6663	378	432.8	411.23	O=C(C(Cl)(Cl)Cl)Nc1cccc(c1)N(=O)=O	10.71703	5.06811	125.42
OCRSOL01	InChI=1S/C7H8O/c1-6-4-2-3-5-7(6)8/h2-5	8H	1H3	9	3	H8C7O	1403.0954	-	305	236.94	Cc1ccccc1O	8.44723	2.07701	110.10
OCRSOL02	InChI=1S/C7H8O/c1-6-4-2-3-5-7(6)8/h2-5	8H	1H3	4	1	H8C7O	592.9099	-	305	91.39	Cc1ccccc1O	8.91408	4.09543	37.38
ODAJIM	InChI=1S/C18H16O7/c1-22-10-6-4-9(5-7-10)17-16(21)14(19)13-11(25-17)8-12(23-2)18(24-3)15(13)20/h4-8	20-21H	1-3H3	2	1	H16C18O7	801.8156	-	486	393.95	COc1ccc(cc1)c1oc2cc(OC)c(c(c2c(=O)c1O)O)OC	11.67355	4.91249	99.21
ODAJIM01	InChI=1S/C18H16O7/c1-22-10-6-4-9(5-7-10)17-16(21)14(19)13-11(25-17)8-12(23-2)18(24-3)15(13)20/h4-8	20-21H	1-3H3	16	1	H16C18O7	6257.2338	-	486	377.28	COc1ccc(cc1)c1oc2cc(OC)c(c(c2c(=O)c1O)O)OC	9.97582	4.70367	110.13
ODASAO	InChI=1S/C14H13NO4S/c1-10-2-8-13(9-3-10)20(18	19)15-12-6-4-11(5-7-12)14(16)17/h2-9	15H	1H3	(H	16	17)	4	1	H13SC14O4N	1355.4197	504	478.9	432.84	Cc1ccc(cc1)S(=O)(=O)Nc1ccc(cc1)C(=O)O	13.18476	8.11423	100.30
ODASAO01	InChI=1S/C14H13NO4S/c1-10-2-8-13(9-3-10)20(18	19)15-12-6-4-11(5-7-12)14(16)17/h2-9	15H	1H3	(H	16	17)	2	1	H13C14SO4N	673.3535	504	478.9	412.41	Cc1ccc(cc1)S(=O)(=O)Nc1ccc(cc1)C(=O)O	11.90673	7.38158	105.98
ODEFOT	InChI=1S/C10H10O3/c1-6-5-7-3-2-4-8(11)9(7)10(12)13-6/h2-4	6	11H	5H2	1H3/t6-/m1/s1	6	6	H10C10O3	1307.763	329	366.5	482.39	C[C@@H]1Cc2cccc(c2C(=O)O1)O	10.24641	3.65304	205.86
ODEFOT01	InChI=1S/C10H10O3/c1-6-5-7-3-2-4-8(11)9(7)10(12)13-6/h2-4	6	11H	5H2	1H3/t6-/m1/s1	4	1	H10C10O3	877.1799	329	366.5	441.24	C[C@@H]1Cc2cccc(c2C(=O)O1)O	8.68692	3.50281	225.52
OGILIA	InChI=1S/C9H7N2O3/c12-10-6-5-9(11(13)14)7-3-1-2-4-8(7)10/h1-6	8H/t8-/m0/s1	4	1	H6C9O3N2	807.3338	-	400.4	375.84	[O]N1C=CC(=C2[C@@H]1C=CC=C2)N(=O)=O	12.57419	3.71166	94.26
OGILIA01	InChI=1S/C9H7N2O3/c12-10-6-5-9(11(13)14)7-3-1-2-4-8(7)10/h1-6	8H/t8-/m0/s1	4	1	H6C9O3N2	818.2618	-	400.4	421.24	[O]N1C=CC(=C2[C@@H]1C=CC=C2)N(=O)=O	12.46563	4.23332	111.12
ONITAN01	InChI=1S/C6H6N2O2/c7-5-3-1-2-4-6(5)8(9)10/h1-4H	7H2	8	2	H6C6O2N2	1253.9321	-	430.7	716.15	O=N(=O)c1ccccc1N	12.49529	4.37769	285.91
ONITAN03	InChI=1S/C6H6N2O2/c7-5-3-1-2-4-6(5)8(9)10/h1-4H	7H2	8	2	H6C6O2N2	1267.5312	-	430.7	682.8	O=N(=O)c1ccccc1N	11.46513	3.02865	310.66
OPOXAZ	InChI=1S/C9H7NO2/c11-9-6-8(12-10-9)7-4-2-1-3-5-7/h1-6H	(H	10	11)	4	1	H7C9O2N	762.242	436	374.5	350.42	Oc1noc(c1)c1ccccc1	11.24556	4.15166	107.59
OPOXAZ01	InChI=1S/C9H7NO2/c11-9-6-8(12-10-9)7-4-2-1-3-5-7/h1-6H	(H	10	11)	4	1	H7C9O2N	760.1201	436	374.5	393.68	Oc1noc(c1)c1ccccc1	10.54665	3.61822	158.35
OQUPUM	InChI=1S/C20H14N4O4/c25-23(26)19-9-1-15(2-10-19)13-21-17-5-7-18(8-6-17)22-14-16-3-11-20(12-4-16)24(27)28/h1-14H/b21-13+	22-14+	1	1	H14C20O4N4	437.2827	-	514.3	380.56	O=N(=O)c1ccc(cc1)/C=N/c1ccc(cc1)/N=C/c1ccc(cc1)N(=O)=O	13.75048	3.92606	111.81
OQUPUM01	InChI=1S/C20H14N4O4/c25-23(26)19-9-1-15(2-10-19)13-21-17-5-7-18(8-6-17)22-14-16-3-11-20(12-4-16)24(27)28/h1-14H/b21-13+	22-14+	2	1	H14C20O4N4	860.0114	-	514.3	368.24	O=N(=O)c1ccc(cc1)/C=N/c1ccc(cc1)/N=C/c1ccc(cc1)N(=O)=O	12.25772	3.42429	79.21
PABZAM	InChI=1S/C20H16N2O2/c23-19(15-7-3-1-4-8-15)21-17-11-13-18(14-12-17)22-20(24)16-9-5-2-6-10-16/h1-14H	(H	21	23)(H	22	24)	2	1	H16C20O2N2	775.7177	-	521.9	437.57	O=C(c1ccccc1)Nc1ccc(cc1)NC(=O)c1ccccc1	14.01285	5.67884	87.43
PABZAM01	InChI=1S/C20H16N2O2/c23-19(15-7-3-1-4-8-15)21-17-11-13-18(14-12-17)22-20(24)16-9-5-2-6-10-16/h1-14H	(H	21	23)(H	22	24)	4	1	H16C20O2N2	1677.5156	-	521.9	357.04	O=C(c1ccccc1)Nc1ccc(cc1)NC(=O)c1ccccc1	11.42967	4.3208	82.31
PACBOK	InChI=1S/C39H26/c1-5-19-31-25(13-1)26-14-2-6-20-32(26)37(31)39(35-23-11-9-17-29(35)30-18-10-12-24-36(30)39)38-33-21-7-3-15-27(33)28-16-4-8-22-34(28)38/h1-24	37-38H	4	1	H26C39	2622.2026	564	533.8	339.75	c1ccc2c(c1)[C@](c1c2cccc1)([C@@H]1c2ccccc2c2c1cccc2)[C@@H]1c2ccccc2c2c1cccc2	10.36576	7.01535	85.69
PACBOK01	InChI=1S/C39H26/c1-5-19-31-25(13-1)26-14-2-6-20-32(26)37(31)39(35-23-11-9-17-29(35)30-18-10-12-24-36(30)39)38-33-21-7-3-15-27(33)28-16-4-8-22-34(28)38/h1-24	37-38H	2	1	H26C39	1312.2085	564	533.8	340.83	c1ccc2c(c1)[C@](c1c2cccc1)([C@@H]1c2ccccc2c2c1cccc2)[C@@H]1c2ccccc2c2c1cccc2	10.34815	7.09822	86.50
PATSEJ	InChI=1S/C34H26/c1-5-13-27(14-6-1)21-23-31-25-34(30-19-11-4-12-20-30)32(24-22-28-15-7-2-8-16-28)26-33(31)29-17-9-3-10-18-29/h1-26H/b23-21-	24-22-	2	1	H26C34	1232.5568	465	520.1	233.87	c1ccc(cc1)c1cc(/C=C\c2ccccc2)c(cc1/C=C\c1ccccc1)c1ccccc1	8.64941	6.3496	78.20
PATSEJ02	InChI=1S/C34H26/c1-5-13-27(14-6-1)21-23-31-25-34(30-19-11-4-12-20-30)32(24-22-28-15-7-2-8-16-28)26-33(31)29-17-9-3-10-18-29/h1-26H/b23-21-	24-22-	1	1	H26C34	634.11	465	520.1	282.83	c1ccc(cc1)c1cc(/C=C\c2ccccc2)c(cc1/C=C\c1ccccc1)c1ccccc1	10.20482	5.79527	70.52
PAVBEU	InChI=1S/C8H8S6/c1-4-11-7-8(12-4)14-6(13-7)5-9-2-3-10-5/h4H	2-3H2	1H3	4	1	H8S6C8	1225.79	-	449.6	451.42	C[C@@H]1SC2=C(S1)SC(=C1SCCS1)S2	9.89397	3.17692	145.82
PAVBEU01	InChI=1S/C8H8S6/c1-4-11-7-8(12-4)14-6(13-7)5-9-2-3-10-5/h4H	2-3H2	1H3	4	1	H8S6C8	1170.1053	-	449.6	471.55	C[C@@H]1SC2=C(S1)SC(=C1SCCS1)S2	12.117	5.83387	123.52
PCBZAM11	InChI=1S/C7H6ClNO/c8-6-3-1-5(2-4-6)7(9)10/h1-4H	(H2	9	10)	6	3	H6C7NOCl	1090.0072	-	389.4	456.41	NC(=O)c1ccc(cc1)Cl	11.0391	3.79235	188.64
PCBZAM12	InChI=1S/C7H6ClNO/c8-6-3-1-5(2-4-6)7(9)10/h1-4H	(H2	9	10)	2	1	H6C7NOCl	363.3824	-	389.4	483.18	NC(=O)c1ccc(cc1)Cl	11.0352	3.7945	241.50
PCHSAN	InChI=1S/C13H6Cl5NO3/c14-4-1-6(16)11(20)8(2-4)19-13(22)9-10(18)5(15)3-7(17)12(9)21/h1-3	20-21H	(H	19	22)	2	1	H6C13Cl5O3N	743.3821	-	484.9	353.32	Clc1cc(NC(=O)c2c(O)c(Cl)cc(c2Cl)Cl)c(c(c1)Cl)O	11.23917	5.21775	101.03
PCHSAN01	InChI=1S/C13H6Cl5NO3/c14-4-1-6(16)11(20)8(2-4)19-13(22)9-10(18)5(15)3-7(17)12(9)21/h1-3	20-21H	(H	19	22)	4	1	H6C13Cl5O3N	1500.2998	-	484.9	407.23	Clc1cc(NC(=O)c2c(O)c(Cl)cc(c2Cl)Cl)c(c(c1)Cl)O	12.0921	6.06305	108.46
PDHTEZ	InChI=1S/C12H10N6/c1-3-7-13-9(5-1)11-15-17-12(18-16-11)10-6-2-4-8-14-10/h1-8H	(H	15	16)(H	17	18)	2	1	H10C12N6	564.2757	-	435.7	456.55	c1ccc(nc1)[C]1[N]N[C]([N]N1)c1ccccn1	10.65769	4.58943	141.21
PDHTEZ01	InChI=1S/C12H10N6/c1-3-7-13-9(5-1)11-15-17-12(18-16-11)10-6-2-4-8-14-10/h1-8H	(H	15	16)(H	17	18)	4	1	H10C12N6	1147.6304	-	435.7	456.43	c1ccc(nc1)[C]1[N]N[C]([N]N1)c1ccccn1	10.62619	3.97486	145.47
PEDTAV	InChI=1S/C20H24N2O3/c1-4-25-20(24)18(14-15-8-6-5-7-9-15)21-19(23)16-10-12-17(13-11-16)22(2)3/h5-13	18H	4	14H2	1-3H3	(H	21	23)/t18-/m0/s1	2	1	H24C20O3N2	909.64	-	489.9	359.66	CCOC(=O)[C@H](Cc1ccccc1)NC(=O)c1ccc(cc1)N(C)C	11.79188	8.68123	85.66
PEDTAV01	InChI=1S/C20H24N2O3/c1-4-25-20(24)18(14-15-8-6-5-7-9-15)21-19(23)16-10-12-17(13-11-16)22(2)3/h5-13	18H	4	14H2	1-3H3	(H	21	23)/t18-/m0/s1	4	1	H24C20O3N2	1849.4869	-	489.9	340.95	CCOC(=O)[C@H](Cc1ccccc1)NC(=O)c1ccc(cc1)N(C)C	10.14881	7.85439	94.37
PEFLET	InChI=1S/C18H10F5NO3S/c19-13-14(20)16(22)18(17(23)15(13)21)28(25	26)24-11-8-4-5-9-12(11)27-10-6-2-1-3-7-10/h1-9	24H	4	1	H10C18NSO3F5	1699.3595	-	454.5	391.73	Fc1c(F)c(F)c(c(c1S(=O)(=O)Nc1ccccc1Oc1ccccc1)F)F	11.69054	7.5891	100.50
PEFLET01	InChI=1S/C18H10F5NO3S/c19-13-14(20)16(22)18(17(23)15(13)21)28(25	26)24-11-8-4-5-9-12(11)27-10-6-2-1-3-7-10/h1-9	24H	2	1	H10C18NSO3F5	832.7099	-	454.5	422.56	Fc1c(F)c(F)c(c(c1S(=O)(=O)Nc1ccccc1Oc1ccccc1)F)F	11.52976	5.76963	120.86
PEFTIE	InChI=1S/C9H9N3O2/c1-11(7-6-10)8-2-4-9(5-3-8)12(13)14/h2-5H	7H2	1H3	8	2	H9C9O2N3	1863.8087	387	398.3	515.87	CN(c1ccc(cc1)N(=O)=O)CC#N	11.32112	5.92754	193.37
PEFTIE01	InChI=1S/C9H9N3O2/c1-11(7-6-10)8-2-4-9(5-3-8)12(13)14/h2-5H	7H2	1H3	16	1	H9C9O2N3	3732.6655	387	398.3	448.23	CN(c1ccc(cc1)N(=O)=O)CC#N	10.72593	4.28042	150.98
PEJCAJ	InChI=1S/C13H13NO/c1-9-8-11(14)4-7-13(9)10-2-5-12(15)6-3-10/h2-8	15H	14H2	1H3	8	2	H13C13ON	2135.579	-	412.9	440.61	Oc1ccc(cc1)c1ccc(cc1C)N	12.92227	5.34796	144.97
PEJCAJ01	InChI=1S/C13H13NO/c1-9-8-11(14)4-7-13(9)10-2-5-12(15)6-3-10/h2-8	15H	14H2	1H3	8	2	H13C13ON	2185.5583	-	412.9	381.44	Oc1ccc(cc1)c1ccc(cc1C)N	12.43569	4.97959	118.65
PEJJOF	InChI=1S/C21H16Cl2O/c1-13-11-17(12-14(2)21(13)24)20(15-3-7-18(22)8-4-15)16-5-9-19(23)10-6-16/h3-12H	1-2H3	2	1	H16C21OCl2	918.8731	-	451.7	331.12	CC1=C[C](C=C(C1=O)C)[C](c1ccc(cc1)Cl)c1ccc(cc1)Cl	8.42576	4.39254	129.12
PEJJOF01	InChI=1S/C21H16Cl2O/c1-13-11-17(12-14(2)21(13)24)20(15-3-7-18(22)8-4-15)16-5-9-19(23)10-6-16/h3-12H	1-2H3	4	1	H16C21OCl2	1810.4994	-	451.7	334.87	CC1=C/C(=C(\c2ccc(cc2)Cl)/c2ccc(cc2)Cl)/C=C(C1=O)C	9.47857	4.51946	112.37
PEJJOF02	InChI=1S/C21H16Cl2O/c1-13-11-17(12-14(2)21(13)24)20(15-3-7-18(22)8-4-15)16-5-9-19(23)10-6-16/h3-12H	1-2H3	4	1	H16C21OCl2	1754.3783	-	451.7	333.16	CC1=C[C](C=C(C1=O)C)[C](c1ccc(cc1)Cl)c1ccc(cc1)Cl	9.49034	5.61116	116.93
PENCEN02	InChI=1S/C22H14/c1-2-6-16-10-20-14-22-12-18-8-4-3-7-17(18)11-21(22)13-19(20)9-15(16)5-1/h1-14H	2	2	H14C22	698.3653	573	460.4	274.51	c1ccc2c(c1)cc1c(c2)cc2c(c1)cc1c(c2)cccc1	11.76063	2.95897	63.41
PENCEN05	InChI=1S/C22H14/c1-2-6-16-10-20-14-22-12-18-8-4-3-7-17(18)11-21(22)13-19(20)9-15(16)5-1/h1-14H	2	2	H14C22	698.3228	573	460.4	295.9	c1ccc2c(c1)cc1c(c2)cc2c(c1)cc1c(c2)cccc1	11.74225	2.92878	69.47
PENCEN10	InChI=1S/C22H14/c1-2-6-16-10-20-14-22-12-18-8-4-3-7-17(18)11-21(22)13-19(20)9-15(16)5-1/h1-14H	2	2	H14C22	698.4318	573	460.4	286.55	c1ccc2c(c1)cc1c(c2)cc2c(c1)cc1c(c2)cccc1	11.75279	2.95265	66.86
PERYTN01	InChI=1S/C5H8N4O12/c10-6(11)18-1-5(2-19-7(12)13	3-20-8(14)15)4-21-9(16)17/h1-4H2	4	1	H8C5O12N4	1168.0013	416	426.6	484.67	O=N(=O)OCC(CON(=O)=O)(CON(=O)=O)CON(=O)=O	14.18691	8.93612	104.74
PERYTN11	InChI=1S/C5H8N4O12/c10-6(11)18-1-5(2-19-7(12)13	3-20-8(14)15)4-21-9(16)17/h1-4H2	2	1	H8C5O12N4	577.7321	416	426.6	504.19	O=N(=O)OCC(CON(=O)=O)(CON(=O)=O)CON(=O)=O	15.82105	11.0924	96.44
PHENAZ04	InChI=1S/C12H8N2/c1-2-6-10-9(5-1)13-11-7-3-4-8-12(11)14-10/h1-8H	2	1	H8C12N2	445.4745	431	377.7	292.92	c1ccc2c(c1)nc1c(n2)cccc1	10.44008	2.7068	92.43
PHENAZ11	InChI=1S/C12H8N2/c1-2-6-10-9(5-1)13-11-7-3-4-8-12(11)14-10/h1-8H	4	1	H8C12N2	905.8674	431	377.7	390.3	c1ccc2c(c1)nc1c(n2)cccc1	10.38897	2.99484	133.74
PHENOL03	InChI=1S/C6H6O/c7-6-4-2-1-3-5-6/h1-5	7H	6	3	H6C6O	799.4978	313	289.7	495.66	Oc1ccccc1	7.56704	1.76476	463.81
PHENOL11	InChI=1S/C6H6O/c7-6-4-2-1-3-5-6/h1-5	7H	6	3	H6C6O	759.4497	313	289.7	537.31	Oc1ccccc1	9.16757	3.52123	371.55
PHISCY	InChI=1S/C21H15N3O3/c25-19-22(16-10-4-1-5-11-16)20(26)24(18-14-8-3-9-15-18)21(27)23(19)17-12-6-2-7-13-17/h1-15H	4	1	H15C21O3N3	1721.1278	455	509.7	361.33	O=c1n(c2ccccc2)c(=O)n(c(=O)n1c1ccccc1)c1ccccc1	11.35757	8.5265	101.17
PHISCY01	InChI=1S/C21H15N3O3/c25-19-22(16-10-4-1-5-11-16)20(26)24(18-14-8-3-9-15-18)21(27)23(19)17-12-6-2-7-13-17/h1-15H	16	1	H15C21O3N3	6930.7362	455	509.7	91.81	O=c1n(c2ccccc2)c(=O)n(c(=O)n1c1ccccc1)c1ccccc1	10.61499	7.3434	18.14
PHTGLY	InChI=1S/C10H8N2O4/c13-8(11-16)5-12-9(14)6-3-1-2-4-7(6)10(12)15/h1-4	16H	5H2	(H	11	13)	4	1	H8C10O4N2	996.8502	-	480.5	432.95	ONC(=O)CN1C(=O)c2c(C1=O)cccc2	11.86144	5.35552	125.56
PHTGLY01	InChI=1S/C10H8N2O4/c13-8(11-16)5-12-9(14)6-3-1-2-4-7(6)10(12)15/h1-4	16H	5H2	(H	11	13)	4	1	H8C10O4N2	993.2282	-	480.5	474.46	ONC(=O)CN1C(=O)c2c(C1=O)cccc2	13.34502	6.58956	118.83
PHTRPL01	InChI=1S/C18H30/c1-2-8-14-13(7-1)15-9-3-4-11-17(15)18-12-6-5-10-16(14)18/h13-18H	1-12H2/t13-	14-	15+	16+	17-	18-/m0/s1	4	1	H30C18	1519.9117	-	357.1	369.53	C1CC[C@H]2[C@H](C1)[C@H]1CCCC[C@@H]1[C@@H]1[C@@H]2CCCC1	8.94384	4.357	184.74
PHTRPL03	InChI=1S/C18H30/c1-2-8-14-13(7-1)15-9-3-4-11-17(15)18-12-6-5-10-16(14)18/h13-18H	1-12H2/t13-	14-	15+	16+	17-	18-/m1/s1	4	1	H30C18	1490.4543	-	357.1	381.7	C1CC[C@@H]2[C@@H](C1)[C@@H]1CCCC[C@H]1[C@H]1[C@H]2CCCC1	9.11908	3.77938	178.21
PICAMD02	InChI=1S/C6H6N2O/c7-6(9)5-3-1-2-4-8-5/h1-4H	(H2	7	9)	4	1	H6C6ON2	594.7933	-	368.7	525.26	NC(=O)c1ccccn1	9.95777	3.441	227.77
PICAMD03	InChI=1S/C6H6N2O/c7-6(9)5-3-1-2-4-8-5/h1-4H	(H2	7	9)	8	2	H6C6ON2	1218.7822	-	368.7	627.79	NC(=O)c1ccccn1	10.58896	2.62548	394.27
PIFZAG	InChI=1S/C6H9N3O4/c1-3(10)7-5(12)9-6(13)8-4(2)11/h1-2H3	(H3	7	8	9	10	11	12	13)	4	1	H9C6O4N3	856.3041	-	489.8	553.24	O=C(NC(=O)C)NC(=O)NC(=O)C	12.84556	4.33609	131.00
PIFZAG01	InChI=1S/C6H9N3O4/c1-3(10)7-5(12)9-6(13)8-4(2)11/h1-2H3	(H3	7	8	9	10	11	12	13)	4	1	H9C6O4N3	835.4847	-	489.8	594.82	O=C(NC(=O)C)NC(=O)NC(=O)C	13.42092	6.48057	144.24
PIMELA05	InChI=1S/C7H12O4/c8-6(9)4-2-1-3-5-7(10)11/h1-5H2	(H	8	9)(H	10	11)	4	1	H12C7O4	815.7197	379	396.1	360.76	OC(=O)CCCCCC(=O)O	20.27671	9.54575	121.00
PIMELA07	InChI=1S/C7H12O4/c8-6(9)4-2-1-3-5-7(10)11/h1-5H2	(H	8	9)(H	10	11)	4	1	H12C7O4	811.2954	379	396.1	350.29	OC(=O)CCCCCC(=O)O	20.34311	10.23219	143.44
PIMTAZ01	InChI=1S/C11H12N2S/c1-2-4-9(5-3-1)10-8-13-6-7-14-11(13)12-10/h1-5	10H	6-8H2/t10-/m1/s1	4	1	H12SC11N2	1003.1879	364	396.6	447.53	C1S[C]2N(C1)C[C@@H]([N]2)c1ccccc1	11.0448	4.36861	144.57
PIMTAZ02	InChI=1S/C11H12N2S/c1-2-4-9(5-3-1)10-8-13-6-7-14-11(13)12-10/h1-5	10H	6-8H2/t10-/m1/s1	8	2	H12SC11N2	2022.1631	364	396.6	441.81	C1S[C]2N(C1)C[C@@H]([N]2)c1ccccc1	10.77347	4.18733	146.15
PROGST10	InChI=1S/C18H22N2O2/c1-17(2)14-18(3	19(21)15-10-6-4-7-11-15)22-20(17)16-12-8-5-9-13-16/h4-13	21H	14H2	1-3H3/t18-/m1/s1	4	1	H30C21O2	1771.9446	397	424.7	338.33	ON([C@]1(C)ON(C(C1)(C)C)c1ccccc1)c1ccccc1	10.00156	3.44891	108.94
PROGST13	InChI=1S/C18H22N2O2/c1-17(2)14-18(3	19(21)15-10-6-4-7-11-15)22-20(17)16-12-8-5-9-13-16/h4-13	21H	14H2	1-3H3/t18-/m1/s1	4	1	H30C21O2	1751.1061	397	424.7	329.33	ON([C@]1(C)ON(C(C1)(C)C)c1ccccc1)c1ccccc1	10.09467	4.37304	106.89
PTCDEC	InChI=1S/C21H30O2/c1-13(22)17-6-7-18-16-5-4-14-12-15(23)8-10-20(14	2)19(16)9-11-21(17	18)3/h12	16-19H	4-11H2	1-3H3/t16-	17+	18-	19-	20-	21+/m0/s1	4	1	H10C5S5	923.0429	-	418	490.62	O=C1CC[C@]2(C(=C1)CC[C@@H]1[C@@H]2CC[C@]2([C@H]1CC[C@@H]2C(=O)C)C)C	14.30185	7.00595	105.82
PTCDEC01	InChI=1S/C21H30O2/c1-13(22)17-6-7-18-16-5-4-14-12-15(23)8-10-20(14	2)19(16)9-11-21(17	18)3/h12	16-19H	4-11H2	1-3H3/t16-	17+	18-	19-	20-	21+/m0/s1	4	1	H10C5S5	931.9781	-	418	486.15	O=C1CC[C@]2(C(=C1)CC[C@@H]1[C@@H]2CC[C@]2([C@H]1CC[C@@H]2C(=O)C)C)C	14.89145	8.42419	101.31
PUPBAD	InChI=1S/C4H4N4O2/c5-4-6-1-3(2-7-4)8(9)10/h1-2H	(H2	5	6	7)	4	1	H4C4O2N4	588.9755	-	387.8	530.85	Nc1ncc(cn1)N(=O)=O	16.23134	5.85817	146.08
PUPBAD01	InChI=1S/C4H4N4O2/c5-4-6-1-3(2-7-4)8(9)10/h1-2H	(H2	5	6	7)	4	1	H4C4O2N4	601.9951	-	387.8	556.27	Nc1ncc(cn1)N(=O)=O	14.86573	6.11884	174.93
PYAZAC01	InChI=1S/C5H4N2O2/c8-5(9)4-3-6-1-2-7-4/h1-3H	(H	8	9)	2	1	H4C5O2N2	268.9263	-	371.6	566.07	OC(=O)c1cnccn1	12.26432	4.41345	227.43
PYAZAC02	InChI=1S/C5H4N2O2/c8-5(9)4-3-6-1-2-7-4/h1-3H	(H	8	9)	4	1	H4C5O2N2	541.3814	-	371.6	526.7	OC(=O)c1cnccn1	13.18534	4.89899	179.09
PYDSYD11	InChI=1S/C7H5N3O2/c11-7-5-10(9-12-7)6-2-1-3-8-4-6/h1-5H	8	2	H5C7O2N3	1402.6016	-	395.2	661.72	O=C1O[N]N([CH]1)c1cccnc1	12.14769	3.95971	239.46
PYDSYD14	InChI=1S/C7H5N3O2/c11-7-5-10(9-12-7)6-2-1-3-8-4-6/h1-5H	8	2	H5C7O2N3	1392.6606	-	395.2	687.66	O=C1O[N]N([CH]1)c1cccnc1	13.89397	4.63671	220.75
PYMSUL10	InChI=1S/C8H6N4S2/c1-3-9-7(10-4-1)13-14-8-11-5-2-6-12-8/h1-6H	4	2	H6C8S2N4	964.6804	-	414.3	524.14	c1cnc(nc1)SSc1ncccn1	11.24268	5.97926	165.19
PYMSUL11	InChI=1S/C8H6N4S2/c1-3-9-7(10-4-1)13-14-8-11-5-2-6-12-8/h1-6H	8	1	H6C8S2N4	1915.1032	-	414.3	478.34	c1cnc(nc1)SSc1ncccn1	11.94272	6.59636	135.19
PYRAZI	InChI=1S/C4H4N2/c1-2-6-4-3-5-1/h1-4H	2	1	H4C4N2	202.256	-	274	488.37	n1ccncc1	10.63514	3.46331	337.32
PYRAZI01	InChI=1S/C4H4N2/c1-2-6-4-3-5-1/h1-4H	2	1	H4C4N2	202.2222	-	274	442.91	n1ccncc1	10.64896	3.43162	274.89
PYRIDO04	InChI=1S/C5H5NO/c7-5-3-1-2-4-6-5/h1-4H	(H	6	7)	4	1	H5C5ON	479.3667	-	346.1	393.99	O=c1cccc[nH]1	7.37146	3.24203	223.62
PYRIDO12	InChI=1S/C5H5NO/c7-5-3-1-2-4-6-5/h1-4H	(H	6	7)	8	2	H5C5ON	961.9692	-	346.1	634.12	O=c1cccc[nH]1	9.73181	3.4348	378.35
PYRZIN15	InChI=1S/C5H5N3O/c6-5(9)4-3-7-1-2-8-4/h1-3H	(H2	6	9)	4	1	H5C5ON3	572.9145	461	378.2	666.4903	NC(=O)c1cnccn1	11.73362	3.39296	336.78
PYRZIN16	InChI=1S/C5H5N3O/c6-5(9)4-3-7-1-2-8-4/h1-3H	(H2	6	9)	2	1	H5C5ON3	278.8766	461	378.2	741.0816	NC(=O)c1cnccn1	13.65592	6.06554	395.25
PYRZIN18	InChI=1S/C5H5N3O/c6-5(9)4-3-7-1-2-8-4/h1-3H	(H2	6	9)	4	1	H5C5ON3	562.8457	461	378.2	595.3144	NC(=O)c1cnccn1	13.47262	5.47142	217.73
QAMNAT	InChI=1S/C14H9NO2/c16-15(17)13-7-3-5-11-9-8-10-4-1-2-6-12(10)14(11)13/h1-9H	4	1	H9C14O2N	1062.5911	355	406.2	478.81	O=N(=O)c1cccc2c1c1ccccc1cc2	10.28956	3.29483	172.72
QAMNAT01	InChI=1S/C14H9NO2/c16-15(17)13-7-3-5-11-9-8-10-4-1-2-6-12(10)14(11)13/h1-9H	8	2	H9C14O2N	2131.4696	355	406.2	480.43	O=N(=O)c1cccc2c1c1ccccc1cc2	10.36079	3.42206	186.45
QANHAP	InChI=1S/C25H20N4/c1-3-22(16-26-13-1)18-28-24-9-5-20(6-10-24)15-21-7-11-25(12-8-21)29-19-23-4-2-14-27-17-23/h1-14	16-19H	15H2/b28-18+	29-19+	2	1	H20C25N4	974.624	-	507	355.87	c1ccc(cn1)/C=N/c1ccc(cc1)Cc1ccc(cc1)/N=C/c1cccnc1	12.87325	9.48467	82.68
QANHAP01	InChI=1S/C25H20N4/c1-3-22(16-26-13-1)18-28-24-9-5-20(6-10-24)15-21-7-11-25(12-8-21)29-19-23-4-2-14-27-17-23/h1-14	16-19H	15H2/b28-18+	29-19+	4	1	H20C25N4	1954.4416	-	507	339.83	c1ccc(cn1)/C=N/c1ccc(cc1)Cc1ccc(cc1)/N=C/c1cccnc1	10.80119	7.6753	86.79
QANTUV	InChI=1S/C14H12N2O2/c1-10-2-4-12(5-3-10)15-16-13-6-7-14(18)11(8-13)9-17/h2-9	18H	1H3/b16-15+	4	1	H12C14O2N2	1178.7277	412	410.7	432	O=Cc1cc(/N=N/c2ccc(cc2)C)ccc1O	12.24807	4.17064	136.90
QANTUV02	InChI=1S/C14H12N2O2/c1-10-2-4-12(5-3-10)15-16-13-6-7-14(18)11(8-13)9-17/h2-9	18H	1H3/b16-15+	8	1	H12C14O2N2	2386.2596	412	410.7	456.76	O=Cc1cc(/N=N/c2ccc(cc2)C)ccc1O	11.04659	3.76142	160.07
QEGBUB	InChI=1S/C16H12OS/c1-11(17)18-16-14-8-4-2-6-12(14)10-13-7-3-5-9-15(13)16/h2-10H	1H3	8	1	H12SC16O	2482.6943	-	422.4	423	CC(=O)Sc1c2ccccc2cc2c1cccc2	10.88311	3.74221	129.99
QEGBUB01	InChI=1S/C16H12OS/c1-11(17)18-16-14-8-4-2-6-12(14)10-13-7-3-5-9-15(13)16/h2-10H	1H3	4	2	H12SC16O	1233.868	-	422.4	501.86	CC(=O)Sc1c2ccccc2cc2c1cccc2	11.90821	3.95416	152.42
QEJZAH	InChI=1S/C8H7NO4/c1-13-8-3-2-6(5-10)4-7(8)9(11)12/h2-5H	1H3	16	2	H7C8O4N	3287.6952	352	378.8	564.47	COc1ccc(cc1N(=O)=O)C=O	11.45144	5.28215	199.04
QEJZAH01	InChI=1S/C8H7NO4/c1-13-8-3-2-6(5-10)4-7(8)9(11)12/h2-5H	1H3	4	1	H7C8O4N	800.1273	352	378.8	510.7	COc1ccc(cc1N(=O)=O)C=O	12.39073	4.03225	166.57
QEKDIT	InChI=1S/C9Cl2N6S/c10-6-5-9(16-18-15-6)17-7(11)3(1-12)4(2-13)8(17)14-5	2	1	SN6C9Cl2	539.9912	518	463	474.05	N#Cc1c2nc3c(n2c(c1C#N)Cl)nsnc3Cl	11.05339	5.28088	126.81
QEKDIT01	InChI=1S/C9Cl2N6S/c10-6-5-9(16-18-15-6)17-7(11)3(1-12)4(2-13)8(17)14-5	4	1	SN6C9Cl2	1064.5808	518	463	433.56	N#Cc1c2nc3c(n2c(c1C#N)Cl)nsnc3Cl	11.09012	3.37718	114.17
QIJTOS	InChI=1S/C7H14O6/c8-1-4-6(10)7(11)5(2-9)13-3-12-4/h4-11H	1-3H2/t4-	5-	6-	7-/m1/s1	4	2	H14C7O6	898.8355	-	423.3	432.2	OC[C@H]1OCO[C@@H]([C@H]([C@@H]1O)O)CO	13.8398	9.03033	101.83
QIJTOS01	InChI=1S/C7H14O6/c8-1-4-6(10)7(11)5(2-9)13-3-12-4/h4-11H	1-3H2/t4-	5-	6-	7-/m1/s1	4	2	H14C7O6	869.3538	-	423.3	433.28	OC[C@H]1OCO[C@@H]([C@H]([C@@H]1O)O)CO	16.56252	10.7438	93.87
QIXFUY	InChI=1S/C19H28O2/c20-17-15-9-6-4-2-1-3-5-7-11-18(17)12-8-13-19(18)14-10-16(15)21-19/h10	14-16H	1-9	11-13H2/t15-	16+	18-	19-/m1/s1	4	1	H28C19O2	1620.2938	-	403.1	405.7834	O=C1[C@@H]2CCCCCCCCC[C@]31CCC[C@@]13O[C@H]2C=C1	9.91035	5.06201	155.77
QIXFUY01	InChI=1S/C19H28O2/c20-17-15-9-6-4-2-1-3-5-7-11-18(17)12-8-13-19(18)14-10-16(15)21-19/h10	14-16H	1-9	11-13H2/t15-	16+	18-	19-/m1/s1	4	1	H28C19O2	1591.309079	-	403.1	410.03	O=C1[C@@H]2CCCCCCCCC[C@]31CCC[C@@]13O[C@H]2C=C1	10.65987	5.85757	141.64
QIYFEJ	InChI=1S/C16H16N2O2S2/c17-15-11-3-1-4-12(15)8-22-10-14-6-2-5-13(9-21-7-11)16(14)18(19)20/h1-6H	7-10	17H2	8	1	H16S2C16O2N2	2939.405	497	471.8	490.18	Nc1c2CSCc3cccc(CSCc1ccc2)c3N(=O)=O	14.26829	8.09901	99.93
QIYFEJ01	InChI=1S/C16H16N2O2S2/c17-15-11-3-1-4-12(15)8-22-10-14-6-2-5-13(9-21-7-11)16(14)18(19)20/h1-6H	7-10	17H2	8	1	H16S2C16O2N2	2976.5175	497	471.8	500.76	Nc1c2CSCc3cccc(CSCc1ccc2)c3N(=O)=O	13.46745	6.23972	109.79
QIZHIQ	InChI=1S/C3H2Cl2N4/c4-1-7-2(5)9-3(6)8-1/h(H2	6	7	8	9)	4	1	H2C3Cl2N4	606.591	-	367.1	579.75	Nc1nc(Cl)nc(n1)Cl	11.6734	4.25364	350.06
QIZHIQ01	InChI=1S/C3H2Cl2N4/c4-1-7-2(5)9-3(6)8-1/h(H2	6	7	8	9)	8	2	H2C3Cl2N4	1227.6198	-	367.1	468.84	Nc1nc(Cl)nc(n1)Cl	9.68076	2.09743	177.89
QNACRD04	InChI=1S/C20H12N2O2/c23-19-11-5-1-3-7-15(11)21-17-10-14-18(9-13(17)19)22-16-8-4-2-6-12(16)20(14)24/h1-10H	(H	21	23)(H	22	24)	2	1	H12C20O2N2	716.626	-	520.8	760.18	O=c1c2cc3[nH]c4ccccc4c(=O)c3cc2[nH]c2c1cccc2	12.39659	4.01874	100.30
QNACRD07	InChI=1S/C20H12N2O2/c23-19-11-5-1-3-7-15(11)21-17-10-14-18(9-13(17)19)22-16-8-4-2-6-12(16)20(14)24/h1-10H	(H	21	23)(H	22	24)	2	1	H12C20O2N2	689.0313	-	520.8	576.58	O=c1c2cc3[nH]c4ccccc4c(=O)c3cc2[nH]c2c1cccc2	14.8492	4.74589	119.87
QNGHSU01	InChI=1S/C15H22O5/c1-8-4-5-11-9(2)12(16)17-13-15(11)10(8)6-7-14(3	18-13)19-20-15/h8-11	13H	4-7H2	1-3H3/t8-	9-	10+	11+	13-	14-	15-/m1/s1	4	4	H22C15O5	1431.13	429	403.9	445.36	O=C1O[C@@H]2O[C@@]3(C)CC[C@@H]4[C@]2([C@H]([C@H]1C)CC[C@H]4C)OO3	10.09612	3.43207	173.14
QNGHSU02	InChI=1S/C15H22O5/c1-8-4-5-11-9(2)12(16)17-13-15(11)10(8)6-7-14(3	18-13)19-20-15/h8-11	13H	4-7H2	1-3H3/t8-	9-	10+	11+	13-	14-	15-/m1/s1	4	1	H22C15O5	1434.9757	429	403.9	449.53	O=C1O[C@@H]2O[C@@]3(C)CC[C@@H]4[C@]2([C@H]([C@H]1C)CC[C@H]4C)OO3	9.76681	3.46042	188.52
QOTGOV01	InChI=1S/C15H19N3O2/c19-18(20)13-1-2-14(16-9-13)17-15-6-10-3-11(7-15)5-12(4-10)8-15/h1-2	9-12H	3-8H2	(H	16	17)/t10-	11+	12-	15-	4	1	H19C15O2N3	1394.5975	439	425.8	432.19	O=N(=O)c1ccc(nc1)N[C@]12C[C@H]3C[C@@H](C2)C[C@@H](C1)C3	10.49149	4.11576	149.09
QOTGOV02	InChI=1S/C15H19N3O2/c19-18(20)13-1-2-14(16-9-13)17-15-6-10-3-11(7-15)5-12(4-10)8-15/h1-2	9-12H	3-8H2	(H	16	17)/t10-	11+	12-	15-	4	1	H19C15O2N3	1407.2411	439	425.8	429.43	O=N(=O)c1ccc(nc1)N[C@]12C[C@H]3C[C@@H](C2)C[C@@H](C1)C3	9.96364	2.82712	173.55
QOYJOD	InChI=1S/C2H2N4O3/c7-2-3-1(4-5-2)6(8)9/h(H2	3	4	5	7)	4	1	H2C2O3N4	474.8542	-	409.4	616.17	O=N(=O)c1n[nH]c(=O)[nH]1	14.02118	6.08891	159.43
QOYJOD06	InChI=1S/C2H2N4O3/c7-2-3-1(4-5-2)6(8)9/h(H2	3	4	5	7)	8	4	H2C2O3N4	932.7618	-	409.4	906.13	O=N(=O)c1n[nH]c(=O)[nH]1	13.17269	6.062	315.65
QOYNOH	InChI=1S/C6H9N3O2S/c1-9-5(11-3)7-4(10-2)8-6(9)12/h1-3H3	4	1	H9SC6O2N3	851.4495	-	398.4	437.39	COc1nc(OC)n(c(=S)n1)C	10.46261	5.23553	145.24
QOYNOH01	InChI=1S/C6H9N3O2S/c1-9-5(11-3)7-4(10-2)8-6(9)12/h1-3H3	4	1	H9SC6O2N3	860.2469	-	398.4	457.59	COc1nc(OC)n(c(=S)n1)C	10.7408	6.61455	156.11
QQQAXG03	InChI=1S/C9H11NO2/c1-2-12-9(11)7-3-5-8(10)6-4-7/h3-6H	2	10H2	1H3	8	4	H11C9O2N	1800.2023	364	364.5	600.47	CCOC(=O)c1ccc(cc1)N	9.49415	3.12867	344.22
QQQAXG04	InChI=1S/C9H11NO2/c1-2-12-9(11)7-3-5-8(10)6-4-7/h3-6H	2	10H2	1H3	4	1	H11C9O2N	904.0032	364	364.5	387.83	CCOC(=O)c1ccc(cc1)N	8.9942	2.56846	169.94
QQQAXG05	InChI=1S/C9H11NO2/c1-2-12-9(11)7-3-5-8(10)6-4-7/h3-6H	2	10H2	1H3	4	1	H11C9O2N	904.7647	364	364.5	403.49	CCOC(=O)c1ccc(cc1)N	9.56491	2.61646	160.15
QQQCIV01	InChI=1S/C2H3N/c1-2-3/h1H3	4	1	H3C2N	237.4369	227	220.2	234.69	CC#N	9.39525	4.8356	746.47
QQQCIV08	InChI=1S/C2H3N/c1-2-3/h1H3	4	1	H3C2N	238.232	227	220.2	777.2003	CC#N	9.28597	4.71896	749.23
QQQFDJ01	InChI=1S/C15H10O2/c16-15(17)14-12-7-3-1-5-10(12)9-11-6-2-4-8-13(11)14/h1-9H	(H	16	17)	4	1	H10C15O2	1051.7831	490	425.8	617.55	OC(=O)c1c2ccccc2cc2c1cccc2	12.06506	5.21337	224.76
QQQFDJ02	InChI=1S/C15H10O2/c16-15(17)14-12-7-3-1-5-10(12)9-11-6-2-4-8-13(11)14/h1-9H	(H	16	17)	2	1	H10C15O2	527.6739	490	425.8	609.22	OC(=O)c1c2ccccc2cc2c1cccc2	12.04979	5.19431	236.05
RAFFIO	InChI=1S/C12H10O/c1-3-7-11(8-4-1)13-12-9-5-2-6-10-12/h1-10H	4	1	H10C12O	919.0424	293	334.9	725.65	c1ccc(cc1)Oc1ccccc1	10.36853	4.7528	169.82
RAFFIO01	InChI=1S/C12H10O/c1-3-7-11(8-4-1)13-12-9-5-2-6-10-12/h1-10H	4	1	H10C12O	939.6034	293	334.9	782.6	c1ccc(cc1)Oc1ccccc1	9.99679	4.16078	171.72
RAPTEI	InChI=1S/C19H19N3O3/c1-13-18(20-12-14-9-10-16(23)17(11-14)25-3)19(24)22(21(13)2)15-7-5-4-6-8-15/h4-12	23H	1-3H3/b20-12+	4	1	H19C19O3N3	1782.9531	-	488.2	330.69	COc1cc(/C=N/c2c(C)n(n(c2=O)c2ccccc2)C)ccc1O	9.92704	5.29895	102.93
RAPTEI01	InChI=1S/C19H19N3O3/c1-13-18(20-12-14-9-10-16(23)17(11-14)25-3)19(24)22(21(13)2)15-7-5-4-6-8-15/h4-12	23H	1-3H3/b20-12+	4	1	H19C19O3N3	1786.574	-	488.2	345.94	COc1cc(/C=N/c2c(C)n(n(c2=O)c2ccccc2)C)ccc1O	10.01598	3.77903	94.00
REKBUE	InChI=1S/C6H8N2O6/c9-3(10)1-7-5(13)6(14)8-2-4(11)12/h1-2H2	(H	7	13)(H	8	14)(H	9	10)(H	11	12)	2	1	H8C6O6N2	401.6075	523	490.4	498.33	O=C(C(=O)NCC(=O)O)NCC(=O)O	18.17639	11.3048	92.31
REKBUE01	InChI=1S/C6H8N2O6/c9-3(10)1-7-5(13)6(14)8-2-4(11)12/h1-2H2	(H	7	13)(H	8	14)(H	9	10)(H	11	12)	1	1	H8C6O6N2	217.8552	523	490.4	395.04	O=C(C(=O)NCC(=O)O)NCC(=O)O	20.50677	14.36178	80.36
RUNGEN	InChI=1S/C17H17NO3/c1-18-8-7-17-11(9-12(19)16(17)18)5-3-10-4-6-13(21-2)15(20)14(10)17/h3-6	9	16	20H	7-8H2	1-2H3/t16-	17+/m0/s1	4	1	H17C17O3N	1411.7126	-	432.8	397.35	COc1ccc2c(c1O)[C@@]13CCN([C@H]3C(=O)C=C1C=C2)C	10.8982	4.5836	126.81
RUNGEN01	InChI=1S/C17H17NO3/c1-18-8-7-17-11(9-12(19)16(17)18)5-3-10-4-6-13(21-2)15(20)14(10)17/h3-6	9	16	20H	7-8H2	1-2H3/t16-	17+/m0/s1	8	1	H17C17O3N	2813.2804	-	432.8	436.35	COc1ccc2c(c1O)[C@@]13CCN([C@H]3C(=O)C=C1C=C2)C	10.76161	4.81375	132.93
RUVZOY	InChI=1S/C14H12Cl2S2/c15-13-7-3-1-5-11(13)9-17-18-10-12-6-2-4-8-14(12)16/h1-8H	9-10H2	2	1	H12S2C14Cl2	702.5505	348	425.9	331.94	Clc1ccccc1CSSCc1ccccc1Cl	11.51167	6.41244	84.21
RUVZOY01	InChI=1S/C14H12Cl2S2/c15-13-7-3-1-5-11(13)9-17-18-10-12-6-2-4-8-14(12)16/h1-8H	9-10H2	4	1	H12S2C14Cl2	1415.1104	348	425.9	346.02	Clc1ccccc1CSSCc1ccccc1Cl	12.09218	5.93516	85.13
SAFPIY	InChI=1S/C18H12O2S2/c19-15-12-18(22-14-9-5-2-6-10-14)16(20)11-17(15)21-13-7-3-1-4-8-13/h1-12H	4	1	H12S2C18O2	1548.8715	500.5	475.2	417.37	O=C1C=C(Sc2ccccc2)C(=O)C=C1Sc1ccccc1	10.76816	5.77846	114.96
SAFPIY01	InChI=1S/C18H12O2S2/c19-15-12-18(22-14-9-5-2-6-10-14)16(20)11-17(15)21-13-7-3-1-4-8-13/h1-12H	2	1	H12C18S2O2	740.8794	500.5	475.2	456.34	O=C1C=C(Sc2ccccc2)C(=O)C=C1Sc1ccccc1	11.81876	7.44329	125.69
SAJMOH	InChI=1S/C16H24N2O2S2/c19-15-13(21-11-7-3-1-5-9(11)17-15)14-16(20)18-10-6-2-4-8-12(10)22-14/h9-14H	1-8H2	(H	17	19)(H	18	20)	2	1	H10C16S2O2N2	692.0503	-	540	528.94	O=c1[nH]c2ccccc2sc1c1sc2ccccc2[nH]c1=O	14.60628	5.63131	120.21
SAJMOH01	InChI=1S/C16H24N2O2S2/c19-15-13(21-11-7-3-1-5-9(11)17-15)14-16(20)18-10-6-2-4-8-12(10)22-14/h9-14H	1-8H2	(H	17	19)(H	18	20)	1	1	H10C16S2O2N2	343.869	-	540	541.76	O=c1[nH]c2ccccc2sc1c1sc2ccccc2[nH]c1=O	15.25517	5.67169	125.48
SALMID04	InChI=1S/C7H7NO2/c8-7(10)5-3-1-2-4-6(5)9/h1-4	9H	(H2	8	10)	8	1	H7C7O2N	1327.5601	-	387.4	526.58	NC(=O)c1ccccc1O	11.96329	4.38802	169.43
SALMID07	InChI=1S/C7H7NO2/c8-7(10)5-3-1-2-4-6(5)9/h1-4	9H	(H2	8	10)	4	1	H7C7O2N	641.4044	-	387.4	526.83	NC(=O)c1ccccc1O	11.1989	3.65975	188.82
SALOXM02	InChI=1S/C7H7NO2/c9-7-4-2-1-3-6(7)5-8-10/h1-5	9-10H/b8-5+	8	2	H7C7O2N	1335.8357	333	343.1	412.89	O/N=C/c1ccccc1O	9.32309	2.96884	209.00
SALOXM03	InChI=1S/C7H7NO2/c9-7-4-2-1-3-6(7)5-8-10/h1-5	9-10H/b8-5-	4	1	H7C7O2N	653.1771	333	343.1	408.12	O/N=C\c1ccccc1O	10.1971	3.63823	163.09
SAWKIL	InChI=1S/C21H19N3O/c1-2-3-4-9-14-25-17-15-20(18-10-5-7-12-22-18)24-21(16-17)19-11-6-8-13-23-19/h1	5-8	10-13	15-16H	3-4	9	14H2	4	1	H19C21ON3	1753.6106	371	480.5	267.05	C#CCCCCOc1cc(nc(c1)c1ccccn1)c1ccccn1	11.25147	4.68992	66.55
SAWKIL01	InChI=1S/C21H19N3O/c1-2-3-4-9-14-25-17-15-20(18-10-5-7-12-22-18)24-21(16-17)19-11-6-8-13-23-19/h1	5-8	10-13	15-16H	3-4	9	14H2	8	1	H19C21ON3	3543.4053	371	480.5	144.43	C#CCCCCOc1cc(nc(c1)c1ccccn1)c1ccccn1	11.40337	5.26924	29.90
SEPDIA	InChI=1S/C12H10N4O2/c17-11-8-10(16-6-2-4-14-16)12(18)7-9(11)15-5-1-3-13-15/h1-8	17-18H	2	1	H10C12O2N4	536.0753	479	435	539.78	Oc1cc(c(cc1n1cccn1)O)n1cccn1	12.00079	4.22978	166.19
SEPDIA02	InChI=1S/C12H10N4O2/c17-11-8-10(16-6-2-4-14-16)12(18)7-9(11)15-5-1-3-13-15/h1-8	17-18H	4	1	H10C12O2N4	1121.2607	479	435	500.95	Oc1cc(c(cc1n1cccn1)O)n1cccn1	10.6971	3.89234	181.16
SEQHUS	InChI=1S/C19H16N2O/c1-14-7-9-15(10-8-14)17(13-22)12-21-18-6-2-4-16-5-3-11-20-19(16)18/h2-13	21H	1H3	2	1	H16C19ON2	745.7422	-	490.9	452.03	O=C[C](c1ccc(cc1)C)/C=[NH]/c1cccc2c1nccc2	10.48547	4.07305	128.21
SEQHUS01	InChI=1S/C19H16N2O/c1-14-7-9-15(10-8-14)17(13-22)12-21-18-6-2-4-16-5-3-11-20-19(16)18/h2-13	21H	1H3	2	1	H16C19ON2	753.928	-	490.9	430.36	O=C[C](c1ccc(cc1)C)/C=[NH]/c1cccc2c1nccc2	10.27231	4.75006	129.91
SESPEL	InChI=1S/C30H18/c1-5-17-13-14-18-6-2-10-22-26(18)25(17)21(9-1)29(22)30-23-11-3-7-19-15-16-20-8-4-12-24(30)28(20)27(19)23/h1-9	11	13-16H	10	12H2	4	1	H16C30	1831.7851	-	493.4	415.54	C1=Cc2ccc3c4c2C(=C(C2=C5CC=Cc6c5c5c2cccc5cc6)c4ccc3)C1	11.23582	3.80458	114.94
SESPEL01	InChI=1S/C30H18/c1-5-17-13-14-18-6-2-10-22-26(18)25(17)21(9-1)29(22)30-23-11-3-7-19-15-16-20-8-4-12-24(30)28(20)27(19)23/h1-9	11	13-16H	10	12H2	4	1	H16C30	1847.3058	-	493.4	407.5	C1=Cc2ccc3c4c2C(=C(C2=C5CC=Cc6c5c5c2cccc5cc6)c4ccc3)C1	11.01065	3.91589	106.85
SEVPEP	InChI=1S/C10H18O6/c11-5-1-9(15)2-7(13)8(14)4-10(9	16)3-6(5)12/h5-8	11-16H	1-4H2/t5-	6-	7+	8+	9-	10-	2	1	H18C10O6	529.8679	-	437.6	306.29	O[C@@H]1C[C@@]2(O)C[C@H](O)[C@H](C[C@@]2(C[C@H]1O)O)O	11.71936	8.39487	107.81
SEVPEP01	InChI=1S/C10H18O6/c11-5-1-9(15)2-7(13)8(14)4-10(9	16)3-6(5)12/h5-8	11-16H	1-4H2/t5-	6-	7+	8+	9-	10-	2	1	H18C10O6	523.6755	-	437.6	283.68	O[C@@H]1C[C@@]2(O)C[C@H](O)[C@H](C[C@@]2(C[C@H]1O)O)O	9.86443	7.38455	95.39
SIKLIH	InChI=1S/C14H11Cl2NO2/c15-10-5-3-6-11(16)14(10)17-12-7-2-1-4-9(12)8-13(18)19/h1-7	17H	8H2	(H	18	19)	8	1	H11C14Cl2O2N	2685.3109	455	439.7	403.4	OC(=O)Cc1ccccc1Nc1c(Cl)cccc1Cl	9.586	5.68888	137.51
SIKLIH02	InChI=1S/C14H11Cl2NO2/c15-10-5-3-6-11(16)14(10)17-12-7-2-1-4-9(12)8-13(18)19/h1-7	17H	8H2	(H	18	19)	4	1	H11C14Cl2O2N	1360.5089	455	439.7	410.03	OC(=O)Cc1ccccc1Nc1c(Cl)cccc1Cl	10.76974	7.40709	123.48
SIVCAB	InChI=1S/C11H10N2O/c1-8-10(2-3-11(14)13-8)9-4-6-12-7-5-9/h2-7H	1H3	(H	13	14)	4	1	H10C11ON2	946.9439	-	428.7	457.68	O=c1ccc(c([nH]1)C)c1ccncc1	12.45877	4.8587	137.99
SIVCAB01	InChI=1S/C11H10N2O/c1-8-10(2-3-11(14)13-8)9-4-6-12-7-5-9/h2-7H	1H3	(H	13	14)	4	1	H10C11ON2	934.9345	-	428.7	480.15	O=c1ccc(c([nH]1)C)c1ccncc1	11.7425	4.86155	155.88
SLFNMA01	InChI=1S/C11H12N4O2S/c1-8-6-7-13-11(14-8)15-18(16	17)10-4-2-9(12)3-5-10/h2-7H	12H2	1H3	(H	13	14	15)	8	1	H12SC11O2N4	2474.485	509	481.5	404.06	Nc1ccc(cc1)S(=O)(=O)Nc1nccc(n1)C	13.47578	7.92945	84.25
SLFNMA02	InChI=1S/C11H12N4O2S/c1-8-6-7-13-11(14-8)15-18(16	17)10-4-2-9(12)3-5-10/h2-7H	12H2	1H3	(H	13	14	15)	8	2	H12C11SO2N4	2645.684	509	481.5	397.38	Nc1ccc(cc1)S(=O)(=O)Nc1nccc(n1)C	11.82453	6.3432	94.01
SLFNMA03	InChI=1S/C11H12N4O2S/c1-8-6-7-13-11(14-8)15-18(16	17)10-4-2-9(12)3-5-10/h2-7H	12H2	1H3	(H	13	14	15)	4	1	H12SC11O2N4	1293.4359	509	481.5	423.15	Nc1ccc(cc1)S(=O)(=O)Nc1nccc(n1)C	13.58485	7.68909	82.71
SLFNMB01	InChI=1S/C10H11N3O3S/c1-7-6-10(12-16-7)13-17(14	15)9-4-2-8(11)3-5-9/h2-6H	11H2	1H3	(H	12	13)	8	1	H11C10SO3N3	2232.523	443.2	476.6	474.18	Nc1ccc(cc1)S(=O)(=O)Nc1noc(c1)C	14.53308	9.08553	91.44
SLFNMB02	InChI=1S/C10H11N3O3S/c1-7-6-10(12-16-7)13-17(14	15)9-4-2-8(11)3-5-9/h2-6H	11H2	1H3	(H	12	13)	8	1	H11SC10O3N3	2347.8063	443.2	476.6	378.2	Nc1ccc(cc1)S(=O)(=O)Nc1noc(c1)C	12.52728	6.38183	78.87
SLFNMB05	InChI=1S/C10H11N3O3S/c1-7-6-10(12-16-7)13-17(14	15)9-4-2-8(11)3-5-9/h2-6H	11H2	1H3	(H	12	13)	4	1	H11SC10O3N3	1144.8155	443.2	476.6	388	Nc1ccc(cc1)S(=O)(=O)Nc1noc(c1)C	12.93021	6.91815	82.44
SLFNMB06	InChI=1S/C10H11N3O3S/c1-7-6-10(12-16-7)13-17(14	15)9-4-2-8(11)3-5-9/h2-6H	11H2	1H3	(H	12	13)	4	1	H11SC10O3N3	1132.1704	443.2	476.6	445.03	Nc1ccc(cc1)S(=O)(=O)Nc1noc(c1)C	15.25877	9.03455	81.77
SOBPEE	InChI=1S/C15H18N4O2/c1-2-3-9-16-15(21)19-14-17-12(10-13(20)18-14)11-7-5-4-6-8-11/h4-8	10H	2-3	9H2	1H3	(H3	16	17	18	19	20	21)	4	2	H18C15O2N4	1480.549	-	482.3	351.13	CCCCNC(=O)Nc1nc(O)cc(n1)c1ccccc1	11.74284	5.03377	100.84
SOBPEE02	InChI=1S/C15H18N4O2/c1-2-3-9-16-15(21)19-14-17-12(10-13(20)18-14)11-7-5-4-6-8-11/h4-8	10H	2-3	9H2	1H3	(H3	16	17	18	19	20	21)	4	2	H18C15O2N4	1484.2756	-	482.3	347.64	CCCCNC(=O)Nc1nc(O)cc(n1)c1ccccc1	10.70497	3.88254	103.61
SOHXAO	InChI=1S/C16H12O5/c1-7-3-9-13(11(17)4-7)16(20)14-10(15(9)19)5-8(21-2)6-12(14)18/h3-6	17-18H	1-2H3	4	1	H12C16O5	1246.3621	-	455.4	463.9	COc1cc(O)c2c(c1)C(=O)c1c(C2=O)c(O)cc(c1)C	12.02042	3.7131	129.31
SOHXAO01	InChI=1S/C16H12O5/c1-7-3-9-13(11(17)4-7)16(20)14-10(15(9)19)5-8(21-2)6-12(14)18/h3-6	17-18H	1-2H3	4	1	H12C16O5	1262.2522	-	455.4	474.59	COc1cc(O)c2c(c1)C(=O)c1c(C2=O)c(O)cc(c1)C	11.94719	4.12912	132.68
SOMKOU	InChI=1S/C12H13NO3/c14-11-9-5-1-2-6-10(9)16-12(13(11)15)7-3-4-8-12/h1-2	5-6	15H	3-4	7-8H2	2	1	H13C12O3N	542.3345	-	416.3	414.29	ON1C(=O)c2ccccc2OC21CCCC2	10.11308	5.65465	148.63
SOMKOU01	InChI=1S/C12H13NO3/c14-11-9-5-1-2-6-10(9)16-12(13(11)15)7-3-4-8-12/h1-2	5-6	15H	3-4	7-8H2	8	1	H13C12O3N	2106.6448	-	416.3	421.96	ON1C(=O)c2ccccc2OC21CCCC2	9.59275	4.10158	177.95
SUCACB02	InChI=1S/C4H6O4/c5-3(6)1-2-4(7)8/h1-2H2	(H	5	6)(H	7	8)	2	1	H6C4O4	245.659	461	370.9	305.29	OC(=O)CCC(=O)O	21.01122	11.1565	77.65
SUCACB07	InChI=1S/C4H6O4/c5-3(6)1-2-4(7)8/h1-2H2	(H	5	6)(H	7	8)	2	2	H6C4O4	256.0675	461	370.9	214.75	OC(=O)CCC(=O)O	20.96808	10.70902	60.79
SULAMD04	InChI=1S/C6H8N2O2S/c7-5-1-3-6(4-2-5)11(8	9)10/h1-4H	7H2	(H2	8	9	10)	4	1	H8C6SO2N2	752.9372	-	434.4	485.67	Nc1ccc(cc1)S(=O)(=O)N	13.14218	7.95633	110.39
SULAMD08	InChI=1S/C6H8N2O2S/c7-5-1-3-6(4-2-5)11(8	9)10/h1-4H	7H2	(H2	8	9	10)	8	1	H8SC6O2N2	1513.2657	-	434.4	565.46	Nc1ccc(cc1)S(=O)(=O)N	17.01135	6.28871	101.41
SUQFIT	InChI=1S/C14H9ClO2/c15-12-5-2-10(3-6-12)1-4-11-9-13(16)7-8-14(11)17/h1-9H/b4-1+	4	1	H9C14O2Cl	1144.4814	-	414.8	450.2	O=C1C=CC(=O)C=C1/C=C/c1ccc(cc1)Cl	11.20522	3.99579	145.94
SUQFIT01	InChI=1S/C14H9ClO2/c15-12-5-2-10(3-6-12)1-4-11-9-13(16)7-8-14(11)17/h1-9H/b4-1+	2	1	H9C14O2Cl	572.9991	-	414.8	421.97	O=C1C=CC(=O)C=C1/C=C/c1ccc(cc1)Cl	10.70701	3.05783	166.72
SUQWIK	InChI=1S/C16H12N2O/c19-15-9-8-12-5-1-2-6-13(12)14(15)11-18-16-7-3-4-10-17-16/h1-11	18H	8	1	H12C16ON2	2512.0147	450	463.7	456.24	O=C1C=Cc2c([C]1/C=[NH]\c1ccccn1)cccc2	10.20544	3.39525	151.62
SUQWIK01	InChI=1S/C16H12N2O/c19-15-9-8-12-5-1-2-6-13(12)14(15)11-18-16-7-3-4-10-17-16/h1-11	18H	8	2	H12C16ON2	2509.0802	450	463.7	487.91	O=C1C=Cc2c([C]1/C=[NH]/c1ccccn1)cccc2	10.80675	3.18049	145.39
SUWMIG02	InChI=1S/C24H8O6/c25-21-13-5-1-9-10-2-6-15-20-16(24(28)30-23(15)27)8-4-12(18(10)20)11-3-7-14(22(26)29-21)19(13)17(9)11/h1-8H	2	1	H8C24O6	778.5623	-	558.7	366.64	O=C1OC(=O)c2c3c1ccc1c3c(cc2)c2c3c1ccc1c3c(cc2)C(=O)OC1=O	16.61491	7.43885	61.90
SUWMIG03	InChI=1S/C24H8O6/c25-21-13-5-1-9-10-2-6-15-20-16(24(28)30-23(15)27)8-4-12(18(10)20)11-3-7-14(22(26)29-21)19(13)17(9)11/h1-8H	2	1	H8C24O6	769.3695	-	558.7	433.14	O=C1OC(=O)c2c3c1ccc1c3c(cc2)c2c3c1ccc1c3c(cc2)C(=O)OC1=O	21.05599	8.81529	57.85
TALJIZ	InChI=1S/C10H15NO/c1-11(2)8-7-9-3-5-10(12)6-4-9/h3-6	12H	7-8H2	1-2H3	4	1	H15C10ON	980.6607	-	357.2	319.04	CN(CCc1ccc(cc1)O)C	8.30837	4.53912	144.92
TALJIZ01	InChI=1S/C10H15NO/c1-11(2)8-7-9-3-5-10(12)6-4-9/h3-6	12H	7-8H2	1-2H3	4	1	H15C10ON	967.4901	-	357.2	398.32	CN(CCc1ccc(cc1)O)C	11.69786	5.1362	163.53
TAPZIT	InChI=1S/C13H8O2/c14-11-7-12(15)10-6-2-4-8-3-1-5-9(11)13(8)10/h1-7	14H	8	4	H8C13O2	1921.0962	-	411.9	502.76	OC1=CC(=O)c2c3c1cccc3ccc2	8.77336	2.54232	240.63
TAPZIT02	InChI=1S/C13H8O2/c14-11-7-12(15)10-6-2-4-8-3-1-5-9(11)13(8)10/h1-7	14H	8	2	H8C13O2	1862.5606	-	411.9	440.44	OC1=CC(=O)c2c3c1cccc3ccc2	9.8106	3.18169	180.40
TAZPEN01	InChI=1S/C12H10N4/c1-3-7-11-9(5-1)13-16-12-8-4-2-6-10(12)14-15(11)16/h1-2	5-8H	3-4H2	2	1	H8C12N4	492.0965	-	401.5	632.31	C1=Cc2c(=CC1)n1n(n2)c2=CCC=Cc2n1	10.96571	3.05439	263.08
TAZPEN10	InChI=1S/C12H10N4/c1-3-7-11-9(5-1)13-16-12-8-4-2-6-10(12)14-15(11)16/h1-2	5-8H	3-4H2	4	1	H8C12N4	977.5752	-	401.5	549.76	C1=Cc2c(=CC1)n1n(n2)c2=CCC=Cc2n1	9.89018	4.4079	241.47
TCLOBQ	InChI=1S/C6Cl4O2/c7-1-2(8)4(10)6(12)5(11)3(1)9	2	1	C6O2Cl4	415.9152	-	369.5	568.07	ClC1=C(Cl)C(=O)C(=O)C(=C1Cl)Cl	11.44833	3.84391	234.13
TCLOBQ02	InChI=1S/C6Cl4O2/c7-1-2(8)4(10)6(12)5(11)3(1)9	4	1	C6O2Cl4	840.0131	-	369.5	447.08	ClC1=C(Cl)C(=O)C(=O)C(=C1Cl)Cl	10.2304	4.03002	180.46
TEBGAI	InChI=1S/C20H14N4/c1-3-9-21-17(5-1)19-13-15(7-11-23-19)16-8-12-24-20(14-16)18-6-2-4-10-22-18/h1-14H	2	1	H14C20N4	754.065	-	483.2	421.67	c1ccc(nc1)c1nccc(c1)c1ccnc(c1)c1ccccn1	12.66897	5.95263	102.52
TEBGAI01	InChI=1S/C20H14N4/c1-3-9-21-17(5-1)19-13-15(7-11-23-19)16-8-12-24-20(14-16)18-6-2-4-10-22-18/h1-14H	2	1	H14C20N4	774.2962	-	483.2	653.25	c1ccc(nc1)c1nccc(c1)c1ccnc(c1)c1ccccn1	11.22192	4.30773	124.69
TEHMEY	InChI=1S/C10H8FNO2/c11-7-1-2-9-8(4-7)6(5-12-9)3-10(13)14/h1-2	4-5	12H	3H2	(H	13	14)	4	1	H8C10FO2N	899.2938	-	405.2	417.87	OC(=O)Cc1c[nH]c2c1cc(F)cc2	9.80896	5.77171	158.66
TEHMEY01	InChI=1S/C10H8FNO2/c11-7-1-2-9-8(4-7)6(5-12-9)3-10(13)14/h1-2	4-5	12H	3H2	(H	13	14)	8	2	H8C10FO2N	1784.216	-	405.2	456.84	OC(=O)Cc1c[nH]c2c1cc(F)cc2	10.74465	6.43498	162.12
TEKQAB	InChI=1S/C4H3NO2/c6-3-1-2-4(7)5-3/h1-2H	(H	5	6	7)	8	4	H3C4O2N	867.2508	-	379.7	648.55	O=C1C=CC(=O)N1	9.67504	3.87589	361.63
TEKQAB01	InChI=1S/C4H3NO2/c6-3-1-2-4(7)5-3/h1-2H	(H	5	6	7)	8	1	H3C4O2N	876.3231	-	379.7	262.99	O=C1C=CC(=O)N1	9.26261	3.82772	100.84
TELYAK	InChI=1S/C10H6O3/c11-8-5-9(12)10(13)7-4-2-1-3-6(7)8/h1-5	12H	4	2	H6C10O3	797.1881	-	380.5	486.98	O=C1C=C(O)C(=O)c2c1cccc2	12.59124	4.86212	161.69
TELYAK02	InChI=1S/C10H6O3/c11-8-5-9(12)10(13)7-4-2-1-3-6(7)8/h1-5	12H	4	1	H6C10O3	790.2283	-	380.5	552.49	O=C1C=C(O)C(=O)c2c1cccc2	11.47027	3.04221	196.54
TELYAK03	InChI=1S/C10H6O3/c11-8-5-9(12)10(13)7-4-2-1-3-6(7)8/h1-5	12H	12	3	H6C10O3	2399.8435	-	380.5	601.71	O=C1C=C(O)C(=O)c2c1cccc2	12.33388	4.4116	228.54
TEMBES	InChI=1S/C6H6O3/c1-4-6(8)5(7)2-3-9-4/h2-3	8H	1H3	12	3	H6C6O3	1750.3241	-	332.5	537.6523	O=c1ccoc(c1O)C	10.30977	4.39861	256.06
TEMBES01	InChI=1S/C6H6O3/c1-4-6(8)5(7)2-3-9-4/h2-3	8H	1H3	8	2	H6C6O3	1154.9779	-	332.5	313.9	O=c1ccoc(c1O)C	11.60182	4.60241	103.04
THALID03	InChI=1S/C13H10N2O4/c16-10-6-5-9(11(17)14-10)15-12(18)7-3-1-2-4-8(7)13(15)19/h1-4	9H	5-6H2	(H	14	16	17)/t9-/m1/s1	8	1	H10C13O4N2	2310.405	551	500	284.05	O=C1CC[C@H](C(=O)N1)N1C(=O)c2c(C1=O)cccc2	12.81985	6.68889	54.76
THALID10	InChI=1S/C13H10N2O4/c16-10-6-5-9(11(17)14-10)15-12(18)7-3-1-2-4-8(7)13(15)19/h1-4	9H	5-6H2	(H	14	16	17)/t9-/m1/s1	4	1	H10C13O4N2	1219.5576	551	500	503.11	O=C1CC[C@H](C(=O)N1)N1C(=O)c2c(C1=O)cccc2	12.02016	4.47319	124.11
THBARB01	InChI=1S/C4H4N2O2S/c7-2-1-3(8)6-4(9)5-2/h1H2	(H2	5	6	7	8	9)	4	1	H4SC4O2N2	568.1327	-	438.4	620.11	O=C1CC(=O)NC(=S)N1	14.98663	6.04788	147.63
THBARB02	InChI=1S/C4H4N2O2S/c7-2-1-3(8)6-4(9)5-2/h1H2	(H2	5	6	7	8	9)	16	4	H4C4SO2N2	2288.1695	-	438.4	666.2186	O=C1CC(=O)NC(=S)N1	15.26758	6.42326	153.21
THBARB03	InChI=1S/C4H4N2O2S/c7-2-1-3(8)6-4(9)5-2/h1H2	(H2	5	6	7	8	9)	8	2	H4C4SO2N2	1141.2164	-	438.4	679.41	O=C1CC(=O)NC(=S)N1	15.72455	5.81856	152.87
THHYDT	InChI=1S/C3H4N2OS/c6-2-1-4-3(7)5-2/h1H2	(H2	4	5	6	7)	4	1	H4C3SON2	467.7332	-	410.2	646.52	O=C1CNC(=S)N1	14.6848	6.25687	186.59
THHYDT02	InChI=1S/C3H4N2OS/c6-2-1-4-3(7)5-2/h1H2	(H2	4	5	6	7)	2	1	H4SC3ON2	233.3765	-	410.2	479.51	O=C1CNC(=S)N1	13.08149	4.67494	148.83
TINBIB	InChI=1S/C11H20O2S/c1-10(2)8-4-5-11(10	7-14(3)13)9(12)6-8/h8-9	12H	4-7H2	1-3H3/t8-	9-	11-/m1/s1	8	2	H20C11SO2	2290.786	357	382.8	347.1436	C[S@](C[C@]12CC[C@@H](C2(C)C)C[C@H]1O)[O]	9.68626	5.53184	130.80
TINBIB01	InChI=1S/C11H20O2S/c1-10(2)8-4-5-11(10	7-14(3)13)9(12)6-8/h8-9	12H	4-7H2	1-3H3/t8-	9-	11-/m1/s1	4	2	H20C11SO2	1228.6471	357	382.8	302.65	C[S@](C[C@]12CC[C@@H](C2(C)C)C[C@H]1O)[O]	8.5705	4.47017	142.64
TITVAU	InChI=1S/C11H8FN3O/c12-8-1-3-9(4-2-8)15-11(16)10-7-13-5-6-14-10/h1-7H	(H	15	16)	4	1	H8C11N3OF	982.9234	425	415.6	534.5	Fc1ccc(cc1)NC(=O)c1cnccn1	12.09758	3.89875	185.68
TITVAU01	InChI=1S/C11H8FN3O/c12-8-1-3-9(4-2-8)15-11(16)10-7-13-5-6-14-10/h1-7H	(H	15	16)	8	4	H8C11N3OF	1978.4865	425	415.6	268.7	Fc1ccc(cc1)NC(=O)c1cnccn1	10.94499	3.70625	80.75
TNBENZ10	InChI=1S/C6H3N3O6/c10-7(11)4-1-5(8(12)13)3-6(2-4)9(14)15/h1-3H	16	2	H3C6O6N3	3285.945	395	384	587.5687	O=N(=O)c1cc(cc(c1)N(=O)=O)N(=O)=O	11.94529	3.79345	193.93
TNBENZ12	InChI=1S/C6H3N3O6/c10-7(11)4-1-5(8(12)13)3-6(2-4)9(14)15/h1-3H	8	2	H3C6O6N3	1760.1235	395	384	384.02	O=N(=O)c1cc(cc(c1)N(=O)=O)N(=O)=O	6.8388	2.98566	214.17
TNBENZ13	InChI=1S/C6H3N3O6/c10-7(11)4-1-5(8(12)13)3-6(2-4)9(14)15/h1-3H	4	1	H3C6O6N3	823.1392	395	384	531.61	O=N(=O)c1cc(cc(c1)N(=O)=O)N(=O)=O	12.2645	4.25476	170.36
TOBRUX	InChI=1S/C4H11N5S/c1-6-8-3(5)4(10)9-7-2/h6-8H	5H2	1-2H3	4	1	H11SC4N5	790.5259	458	457.4	449.56	CN[N]C(=S)C(=[NH2])NNC	11.98155	7.56653	117.46
TOBRUX01	InChI=1S/C4H11N5S/c1-6-8-3(5)4(10)9-7-2/h6-8H	5H2	1-2H3	8	1	H11SC4N5	1560.1963	458	457.4	495.58	CN[N]C(=S)C(=[NH2])NNC	11.96875	8.25075	132.43
TRDMPP01	InChI=1S/C6H10N2O2/c1-3-5(9)8-4(2)6(10)7-3/h3-4H	1-2H3	(H	7	10)(H	8	9)/t3-	4+	2	1	H10C6O2N2	355.6618	-	427.4	524.61	C[C@@H]1NC(=O)[C@H](NC1=O)C	13.59503	7.07313	145.95
TRDMPP02	InChI=1S/C6H10N2O2/c1-3-5(9)8-4(2)6(10)7-3/h3-4H	1-2H3	(H	7	10)(H	8	9)/t3-	4+	2	1	H10C6O2N2	348.2337	-	427.4	527.87	C[C@@H]1NC(=O)[C@H](NC1=O)C	10.90033	7.17489	299.25
TRITAN03	InChI=1S/C3H6S3/c1-4-2-6-3-5-1/h1-3H2	4	4	H6S3C3	558.3305	-	336.9	527.0091	S1CSCSC1	13.47571	5.33616	149.51
TRITAN10	InChI=1S/C3H6S3/c1-4-2-6-3-5-1/h1-3H2	2	1	H6C3S3	278.4962	-	336.9	735.0458	S1CSCSC1	13.53941	5.64915	239.68
TUPGUH	InChI=1S/C19H23NO6/c1-10-15(18(21)25-5)17(16(11(2)20-10)19(22)26-6)12-7-8-13(23-3)14(9-12)24-4/h7-9	17	20H	1-6H3	2	1	H23C19O6N	920.6668	-	466.3	336.51	COC(=O)C1=C(C)NC(=C([C@H]1c1ccc(c(c1)OC)OC)C(=O)OC)C	10.82372	7.06243	89.76
TUPGUH01	InChI=1S/C19H23NO6/c1-10-15(18(21)25-5)17(16(11(2)20-10)19(22)26-6)12-7-8-13(23-3)14(9-12)24-4/h7-9	17	20H	1-6H3	8	1	H23C19O6N	3845.0698	-	466.3	307.82	COC(=O)C1=C(C)NC(=C([C@H]1c1ccc(c(c1)OC)OC)C(=O)OC)C	10.90983	6.2723	75.80
TUQCOX	InChI=1S/C18H15N3O2/c22-21(23)18(16-9-5-2-6-10-16)11-17-12-19-14-20(17)13-15-7-3-1-4-8-15/h1-12	14H	13H2/b18-11+	4	1	H15C18O2N3	1582.1991	-	472.5	383.49	O=N(=O)/C(=C/c1cncn1Cc1ccccc1)/c1ccccc1	11.11477	5.68991	105.08
TUQCOX01	InChI=1S/C18H15N3O2/c22-21(23)18(16-9-5-2-6-10-16)11-17-12-19-14-20(17)13-15-7-3-1-4-8-15/h1-12	14H	13H2/b18-11+	4	1	H15C18O2N3	1516.26	-	472.5	416.73	O=N(=O)/C(=C/c1cncn1Cc1ccccc1)/c1ccccc1	11.77929	6.48026	101.61
UCECAG	InChI=1S/C6H4ClN3O4/c7-4-1-3(9(11)12)2-5(6(4)8)10(13)14/h1-2H	8H2	8	2	H4C6N3O4Cl	1632.1491	434	404.8	621.24	O=N(=O)c1cc(Cl)c(c(c1)N(=O)=O)N	13.82657	5.14673	189.61
UCECAG02	InChI=1S/C6H4ClN3O4/c7-4-1-3(9(11)12)2-5(6(4)8)10(13)14/h1-2H	8H2	2	1	H4C6ClO4N3	422.3287	434	404.8	523.45	O=N(=O)c1cc(Cl)c(c(c1)N(=O)=O)N	13.42464	4.82454	145.58
UCECAG03	InChI=1S/C6H4ClN3O4/c7-4-1-3(9(11)12)2-5(6(4)8)10(13)14/h1-2H	8H2	4	2	H4C6ClO4N3	827.4372	434	404.8	665.71	O=N(=O)c1cc(Cl)c(c(c1)N(=O)=O)N	14.14591	5.35468	211.60
UNEWUF	InChI=1S/C17H16ClN3O2/c1-11-7-3-5-9-14(11)19-17(23)16(12(2)22)21-20-15-10-6-4-8-13(15)18/h3-10	20H	1-2H3	(H	19	23)/b21-16-	2	1	H16C17ClO2N3	800.111	438	470.6	397.11	CC(=O)/C(=N/Nc1ccccc1Cl)/C(=O)Nc1ccccc1C	9.2427	3.90912	142.26
UNEWUF01	InChI=1S/C17H16ClN3O2/c1-11-7-3-5-9-14(11)19-17(23)16(12(2)22)21-20-15-10-6-4-8-13(15)18/h3-10	20H	1-2H3	(H	19	23)/b21-16-	4	2	H16C17ClO2N3	1618.4671	438	470.6	385.17	CC(=O)/C(=N/Nc1ccccc1Cl)/C(=O)Nc1ccccc1C	9.2111	3.39193	131.55
UNEWUF02	InChI=1S/C17H16ClN3O2/c1-11-7-3-5-9-14(11)19-17(23)16(12(2)22)21-20-15-10-6-4-8-13(15)18/h3-10	20H	1-2H3	(H	19	23)/b21-16-	4	2	H16C17ClO2N3	1608.0448	438	470.6	406.64	CC(=O)/C(=N/Nc1ccccc1Cl)/C(=O)Nc1ccccc1C	9.15926	3.83086	151.02
UVEXID	InChI=1S/C18H16N2O/c1-13-8-15(10-16(9-13)17(11-19)12-20)3-2-14-4-6-18(21)7-5-14/h2-7	10	13	21H	8-9H2	1H3/b3-2+/t13-/m0/s1	4	1	H16C18ON2	1521.1941	-	451.6	343.55	C[C@H]1CC(=CC(=C(C#N)C#N)C1)/C=C/c1ccc(cc1)O	11.57453	5.29692	132.21
UVEXID01	InChI=1S/C18H16N2O/c1-13-8-15(10-16(9-13)17(11-19)12-20)3-2-14-4-6-18(21)7-5-14/h2-7	10	13	21H	8-9H2	1H3/b3-2+/t13-/m0/s1	4	1	H16C18ON2	1483.7286	-	451.6	349.46	C[C@H]1CC(=CC(=C(C#N)C#N)C1)/C=C/c1ccc(cc1)O	13.02064	5.56896	115.73
VALPII	InChI=1S/C5H12N6O5/c12-5(6-1-3-8-10(13)14)7-2-4-9-11(15)16/h8-9H	1-4H2	(H2	6	7	12)	4	1	H12C5O5N6	1029.0036	-	469.9	510.27	O=C(NCCNN(=O)=O)NCCNN(=O)=O	13.12287	6.59598	142.57
VALPII01	InChI=1S/C5H12N6O5/c12-5(6-1-3-8-10(13)14)7-2-4-9-11(15)16/h8-9H	1-4H2	(H2	6	7	12)	8	1	H12C5O5N6	2094.7006	-	469.9	438.95	O=C(NCCNN(=O)=O)NCCNN(=O)=O	12.80567	5.98792	98.68
VATRIT	InChI=1S/C9H7NO2/c11-7-3-1-2-6-4-5-8(12)10-9(6)7/h1-5	11H	(H	10	12)	16	2	H7C9O2N	2968.3583	-	419.3	467.14	O=c1ccc2c([nH]1)c(O)ccc2	13.56516	4.64957	147.83
VATRIT01	InChI=1S/C9H7NO2/c11-7-3-1-2-6-4-5-8(12)10-9(6)7/h1-5	11H	(H	10	12)	4	1	H7C9O2N	739.2574	-	419.3	471.23	O=c1ccc2c([nH]1)c(O)ccc2	12.2548	2.59714	141.05
VAWDOM	InChI=1S/C15H11Cl2NO2/c16-14-9-6-7-10(8-9)15(14	17)13(20)18(12(14)19)11-4-2-1-3-5-11/h1-7	9-10H	8H2/t9-	10+	14-	15+	4	1	H11C15Cl2O2N	1325.7776	477	449.4	449.99	O=C1N(c2ccccc2)C(=O)[C@@]2([C@@]1(Cl)[C@@H]1C=C[C@H]2C1)Cl	10.20228	7.08926	154.49
VAWDOM11	InChI=1S/C15H11Cl2NO2/c16-14-9-6-7-10(8-9)15(14	17)13(20)18(12(14)19)11-4-2-1-3-5-11/h1-7	9-10H	8H2/t9-	10+	14-	15+	4	1	H11C15Cl2O2N	1315.6805	477	449.4	480.3	O=C1N(c2ccccc2)C(=O)[C@@]2([C@@]1(Cl)[C@@H]1C=C[C@H]2C1)Cl	11.10871	5.70479	147.70
VIHGID	InChI=1S/C11H9NO2/c1-14-11(13)10(8-12)7-9-5-3-2-4-6-9/h2-7H	1H3/b10-7+	2	1	H16C19ON2	769.568	360	364.7	360.51	COC(=O)/C(=C/c1ccccc1)/C#N	9.87596	4.69852	138.54
VIHGID01	InChI=1S/C11H9NO2/c1-14-11(13)10(8-12)7-9-5-3-2-4-6-9/h2-7H	1H3/b10-7+	8	2	H16C19ON2	3013.8914	360	364.7	360.89	COC(=O)/C(=C/c1ccccc1)/C#N	9.54385	5.07501	145.55
VOBNAB	InChI=1S/C19H16N2O/c20-16-11-5-6-12-17(16)21-19(14-8-2-1-3-9-14)15-10-4-7-13-18(15)22/h1-13	22H	20H2/b21-19+	4	1	H10C11ON4	1081.7929	415	444.8	372.18	Nc1ccccc1/N=C(/c1ccccc1O)\c1ccccc1	11.87555	8.55909	101.38
VOBNAB01	InChI=1S/C19H16N2O/c20-16-11-5-6-12-17(16)21-19(14-8-2-1-3-9-14)15-10-4-7-13-18(15)22/h1-13	22H	20H2/b21-19+	4	1	H10C11ON4	1054.7946	415	444.8	19.13	Nc1ccccc1/N=C(/c1ccccc1O)\c1ccccc1	11.03861	4.42276	4.26
VUFGEI	InChI=1S/C18H30N2O4/c1-3-7-17-9-5-15(21)19(17)11-14-24-18(8-4-2)10-6-16(22)20(18)12-13-23-17/h3-14H2	1-2H3/t17-	18+	2	1	H30C18O4N2	886.1282	472	469.8	434.96	CCC[C@]12OCCN3C(=O)CC[C@]3(OCCN2C(=O)CC1)CCC	12.83139	6.38723	99.93
VUFGEI01	InChI=1S/C18H30N2O4/c1-3-7-17-9-5-15(21)19(17)11-14-24-18(8-4-2)10-6-16(22)20(18)12-13-23-17/h3-14H2	1-2H3/t17-	18+	4	1	H30C18O4N2	1814.4051	472	469.8	346.93	CCC[C@]12OCCN3C(=O)CC[C@]3(OCCN2C(=O)CC1)CCC	10.02794	6.71894	117.81
VUJZAB	InChI=1S/C8H8N4S/c9-12-7(10-11-8(12)13)6-4-2-1-3-5-6/h1-5H	9H2	(H	11	13)	2	1	H8SC8N4	425.8063	-	448.2	451.02	Nn1c(=S)[nH]nc1c1ccccc1	11.71339	5.06237	126.46
VUJZAB01	InChI=1S/C8H8N4S/c9-12-7(10-11-8(12)13)6-4-2-1-3-5-6/h1-5H	9H2	(H	11	13)	4	1	H8SC8N4	895.2798	-	448.2	411.54	Nn1c(=S)[nH]nc1c1ccccc1	10.35726	4.66339	124.88
VUNYUY10	InChI=1S/C10H7NO4/c12-8(13)5-11-9(14)6-3-1-2-4-7(6)10(11)15/h1-4H	5H2	(H	12	13)	8	1	H7C10O4N	1938.2147	-	436.3	471.58	OC(=O)CN1C(=O)c2c(C1=O)cccc2	9.48884	3.58084	229.12
VUNYUY11	InChI=1S/C10H7NO4/c12-8(13)5-11-9(14)6-3-1-2-4-7(6)10(11)15/h1-4H	5H2	(H	12	13)	4	2	H7C10O4N	930.7337	-	436.3	511.46	OC(=O)CN1C(=O)c2c(C1=O)cccc2	12.01269	5.0705	167.24
VUPTAC	InChI=1S/C2H5N5/c3-2-6-5-1-7(2)4/h1H	4H2	(H2	3	6)	4	1	H5C2N5	436.8133	-	397.6	441.1	Nn1cnnc1N	18.68708	9.35012	81.56
VUPTAC01	InChI=1S/C2H5N5/c3-2-6-5-1-7(2)4/h1H	4H2	(H2	3	6)	8	1	H5C2N5	865.6508	-	397.6	388.38	Nn1cnnc1N	13.57652	6.97034	93.82
VURYOW	InChI=1S/C15H11N3/c1-3-10-16-12(6-1)14-8-5-9-15(18-14)13-7-2-4-11-17-13/h1-11H	4	1	H11C15N3	1172.1133	-	413.5	440.74	c1ccc(nc1)c1cccc(n1)c1ccccn1	9.51414	2.82972	184.46
VURYOW02	InChI=1S/C15H11N3/c1-3-10-16-12(6-1)14-8-5-9-15(18-14)13-7-2-4-11-17-13/h1-11H	8	2	H11C15N3	2463.3304	-	413.5	490.32	c1ccc(nc1)c1cccc(n1)c1ccccn1	9.58236	2.79574	194.32
WACHEP	InChI=1S/C12H9Cl2NO2S/c13-10-7-4-8-11(14)12(10)15-18(16	17)9-5-2-1-3-6-9/h1-8	15H	4	1	H9C12NSO2Cl2	1325.5355	-	440.3	462.82	Clc1cccc(c1NS(=O)(=O)c1ccccc1)Cl	10.11941	6.51144	161.95
WACHEP02	InChI=1S/C12H9Cl2NO2S/c13-10-7-4-8-11(14)12(10)15-18(16	17)9-5-2-1-3-6-9/h1-8	15H	4	1	H9C12NSO2Cl2	1302.12	-	440.3	430.68	Clc1cccc(c1NS(=O)(=O)c1ccccc1)Cl	11.79452	5.29677	117.00
WACHEP03	InChI=1S/C12H9Cl2NO2S/c13-10-7-4-8-11(14)12(10)15-18(16	17)9-5-2-1-3-6-9/h1-8	15H	4	1	H9C12NSO2Cl2	1322.9804	-	440.3	443.58	Clc1cccc(c1NS(=O)(=O)c1ccccc1)Cl	10.00776	5.32001	172.37
WANMUU	InChI=1S/C6H5ClO/c7-5-3-1-2-4-6(5)8/h1-4	8H	9	3	H5C6OCl	1366.7876	-	316.3	442.7237	Oc1ccccc1Cl	7.19251	1.81845	331.48
WANMUU01	InChI=1S/C6H5ClO/c7-5-3-1-2-4-6(5)8/h1-4	8H	4	1	H5C6OCl	592.2321	-	316.3	399.0817	Oc1ccccc1Cl	8.33381	3.16457	228.82
WANSAG	InChI=1S/C4H7NO/c1-3(2)4(5)6/h1H2	2H3	(H2	5	6)	4	1	H7C4ON	486.6978	-	329.6	490.38	CC(=C)C(=O)N	11.19986	3.19602	202.13
WANSAG01	InChI=1S/C4H7NO/c1-3(2)4(5)6/h1H2	2H3	(H2	5	6)	8	1	H7C4ON	985.5572	-	329.6	469.98	CC(=C)C(=O)N	10.55593	3.87063	202.27
WAVZAV	InChI=1S/C14H16N2O2/c15-11-5-1-3-7-13(11)17-9-10-18-14-8-4-2-6-12(14)16/h1-8H	9-10	15-16H2	4	1	H16C14O2N2	1314.5595	440	430.6	406.75	Nc1ccccc1OCCOc1ccccc1N	10.59329	4.36226	132.06
WAVZAV01	InChI=1S/C14H16N2O2/c15-11-5-1-3-7-13(11)17-9-10-18-14-8-4-2-6-12(14)16/h1-8H	9-10	15-16H2	4	1	H16C14O2N2	1342.0011	440	430.6	408.15	Nc1ccccc1OCCOc1ccccc1N	9.88404	4.52335	148.93
WEBNUO	InChI=1S/C7H3F3O2/c8-4-1-3(7(11)12)2-5(9)6(4)10/h1-2H	(H	11	12)	4	1	H3C7O2F3	697.1439	-	327.3	488.6787	OC(=O)c1cc(F)c(c(c1)F)F	8.95064	2.67512	297.20
WEBNUO01	InChI=1S/C7H3F3O2/c8-4-1-3(7(11)12)2-5(9)6(4)10/h1-2H	(H	11	12)	4	2	H3C7O2F3	702.1404	-	327.3	488.8459	OC(=O)c1cc(F)c(c(c1)F)F	8.99676	3.28871	343.64
WIZFEQ	InChI=1S/C6H8N2/c1-5-3-8-6(2)4-7-5/h3-4H	1-2H3	2	1	H8C6N2	297.8028	255	303.5	615.75	Cc1ncc(nc1)C	8.97776	2.66579	544.29
WIZFEQ01	InChI=1S/C6H8N2/c1-5-3-8-6(2)4-7-5/h3-4H	1-2H3	8	2	H8C6N2	1182.986	255	303.5	371.4	Cc1ncc(nc1)C	9.59047	3.14994	174.99
WURMOM	InChI=1S/C4H5NO4S/c1-3-2-4(6)5-10(7	8)9-3/h2H	1H3	(H	5	6)	8	2	H5C4SO4N	1305.8082	395	411.5	539.28	O=C1C=C(C)OS(=O)(=O)N1	13.27349	5.72553	153.21
WURMOM01	InChI=1S/C4H5NO4S/c1-3-2-4(6)5-10(7	8)9-3/h2H	1H3	(H	5	6)	2	1	H5SC4O4N	306.5978	395	411.5	577.89	O=C1C=C(C)OS(=O)(=O)N1	11.78225	4.30366	210.35
XAQXOE	InChI=1S/C11H17N3O3/c1-2-11(14-6-4-3-5-7-14)8(15)12-10(17)13-9(11)16/h2-7H2	1H3	(H2	12	13	15	16	17)	4	1	H17C11O3N3	1249.2945	-	473.9	424.84	CCC1(N2CCCCC2)C(=O)NC(=O)NC1=O	10.24019	4.95985	147.17
XAQXOE01	InChI=1S/C11H17N3O3/c1-2-11(14-6-4-3-5-7-14)8(15)12-10(17)13-9(11)16/h2-7H2	1H3	(H2	12	13	15	16	17)	8	2	H17C11O3N3	2458.9116	-	473.9	382.41	CCC1(N2CCCCC2)C(=O)NC(=O)NC1=O	9.72698	5.37716	130.78
XAXCOQ	InChI=1S/C2H5Cl/c1-2-3/h2H2	1H3	6	1	H5C2Cl	523.2593	134	197	590.63	CCCl	6.88419	2.96257	417.98
XAXCOQ02	InChI=1S/C2H5Cl/c1-2-3/h2H2	1H3	4	1	H5C2Cl	350.4374	134	197	324.96	CCCl	6.89142	2.33355	383.20
XEHHEX	InChI=1S/C11H8S5/c12-11-15-9-10(16-11)14-6-8-4-2-1-3-7(8)5-13-9/h1-4H	5-6H2	8	2	H8S5C11	2452.7966	479	459.1	494.85	S=c1sc2c(s1)SCc1c(CS2)cccc1	10.1624	5.11044	159.91
XEHHEX01	InChI=1S/C11H8S5/c12-11-15-9-10(16-11)14-6-8-4-2-1-3-7(8)5-13-9/h1-4H	5-6H2	4	1	H8S5C11	1227.3194	479	459.1	505.52	S=c1sc2c(s1)SCc1c(CS2)cccc1	11.3262	5.52501	145.97
XEJNUV01	InChI=1S/C12H6N2/c13-7-11-5-9-3-1-2-4-10(9)6-12(11)8-14/h1-6H	4	1	H6C12N2	860.4726	-	391.8	586	N#Cc1cc2ccccc2cc1C#N	10.50357	3.22936	259.62
XEJNUV02	InChI=1S/C12H6N2/c13-7-11-5-9-3-1-2-4-10(9)6-12(11)8-14/h1-6H	2	1	H6C12N2	438.8994	-	391.8	469.48	N#Cc1cc2ccccc2cc1C#N	10.8472	3.21997	188.18
XEPXOF	InChI=1S/C20H19N/c1-21(2)19-14-12-18(13-15-19)20(17-10-6-7-11-17)16-8-4-3-5-9-16/h3-15H	1-2H3	4	1	H19C20N	1542.7124	392	417.9	374.72	CN(c1ccc(cc1)/C(=C\1/C=CC=C1)/c1ccccc1)C	11.47076	5.68192	106.15
XEPXOF01	InChI=1S/C20H21N/c1-21(2)19-14-12-18(13-15-19)20(17-10-6-7-11-17)16-8-4-3-5-9-16/h4-16H	3H2	1-2H3	4	1	H19C20N	1568.3356	392	417.9	337.14	CN(c1ccc(cc1)/C(=C/1\C=CC=C1)/[C@@H]1C=CCC=C1)C	9.79726	3.9774	120.96
XEWMER	InChI=1S/C35H28/c1-6-16-26(17-7-1)31-32(27-18-8-2-9-19-27)34(29-22-12-4-13-23-29)35(30-24-14-5-15-25-30)33(31)28-20-10-3-11-21-28/h1-25	31-33H/t31-	32+	33-	2	1	H28C35	1270.2299	-	505.5	317.64	c1ccc(cc1)[C@@H]1[C@H](c2ccccc2)C(=C([C@@H]1c1ccccc1)c1ccccc1)c1ccccc1	9.67729	6.83102	90.64
XEWMER01	InChI=1S/C35H28/c1-6-16-26(17-7-1)31-32(27-18-8-2-9-19-27)34(29-22-12-4-13-23-29)35(30-24-14-5-15-25-30)33(31)28-20-10-3-11-21-28/h1-25	31-33H/t31-	32+	33-	4	1	H28C35	2532.0041	-	505.5	318.84	c1ccc(cc1)[C@@H]1[C@H](c2ccccc2)C(=C([C@@H]1c1ccccc1)c1ccccc1)c1ccccc1	10.32404	7.22638	82.98
XIYXIN	InChI=1S/C10H9NO5S/c1-16-9(12)6-11-10(13)7-4-2-3-5-8(7)17(11	14)15/h2-5H	6H2	1H3	2	1	H9SC10O5N	543.3257	-	446.8	498.49	COC(=O)CN1C(=O)c2c(S1(=O)=O)cccc2	13.12296	5.61721	118.90
XIYXIN01	InChI=1S/C10H9NO5S/c1-16-9(12)6-11-10(13)7-4-2-3-5-8(7)17(11	14)15/h2-5H	6H2	1H3	4	1	H9SC10O5N	1084.3735	-	446.8	441.59	COC(=O)CN1C(=O)c2c(S1(=O)=O)cccc2	11.0797	4.95577	132.29
XOCFOK	InChI=1S/C15H15N3OS/c1-8-4-6-11(7-5-8)16-15-17-13(19)12-9(2)10(3)20-14(12)18-15/h4-7H	1-3H3	(H2	16	17	18	19)	16	2	H15SC15ON3	5719.966	-	496.5	353.38	Cc1ccc(cc1)Nc1[nH]c(=O)c2c(n1)sc(c2C)C	9.35171	3.62943	118.24
XOCFOK01	InChI=1S/C15H15N3OS/c1-8-4-6-11(7-5-8)16-15-17-13(19)12-9(2)10(3)20-14(12)18-15/h4-7H	1-3H3	(H2	16	17	18	19)	16	2	H15SC15ON3	5590.1194	-	496.5	424.71	Cc1ccc(cc1)Nc1[nH]c(=O)c2c(n1)sc(c2C)C	10.63161	3.94124	130.03
XOCJEE	InChI=1S/C2H5N3O2S/c1-8-2(3)4-5(6)7/h1H3	(H2	3	4)	2	1	H5C2SO2N3	264.8887	-	369.8	573	CS/C(=N\N(=O)=O)/N	13.85097	6.71165	173.00
XOCJEE01	InChI=1S/C2H5N3O2S/c1-8-2(3)4-5(6)7/h1H3	(H2	3	4)	2	1	H5C2SO2N3	273.5257	-	369.8	597.01	CS/C(=N\N(=O)=O)/N	14.19236	5.1241	196.18
XOCXUI01	InChI=1S/C15H16O2/c1-11(16)3-4-12-5-6-14-10-15(17-2)8-7-13(14)9-12/h5-10H	3-4H2	1-2H3	8	2	H16C15O2	2458.1579	356	401.8	382.49	COc1ccc2c(c1)ccc(c2)CCC(=O)C	11.89321	5.17908	116.86
XOCXUI02	InChI=1S/C15H16O2/c1-11(16)3-4-12-5-6-14-10-15(17-2)8-7-13(14)9-12/h5-10H	3-4H2	1-2H3	4	1	H16C15O2	1282.4105	356	401.8	294.3	COc1ccc2c(c1)ccc(c2)CCC(=O)C	8.61924	3.95849	140.31
XOJMIT	InChI=1S/C11H10N4O2/c16-15(17)11-5-3-9(4-6-11)14-13-8-10-2-1-7-12-10/h1-8	12	14H/b13-8+	4	2	H10C11O2N4	1131.4588	-	432.4	400.57	O=N(=O)c1ccc(cc1)N/N=C/c1ccc[nH]1	10.40388	4.11664	130.02
XOJMIT01	InChI=1S/C11H10N4O2/c16-15(17)11-5-3-9(4-6-11)14-13-8-10-2-1-7-12-10/h1-8	12	14H/b13-8+	4	1	H10C11O2N4	1142.6579	-	432.4	375.91	O=N(=O)c1ccc(cc1)N/N=C/c1ccc[nH]1	10.74974	2.62389	150.32
XOZBUK	InChI=1S/C6H5NO3/c8-7(9)4-3-6-2-1-5-10-6/h1-5H/b4-3+	4	1	H5C6O3N	626.3716	-	332.3	571.88	O=N(=O)/C=C/c1ccco1	11.52879	5.04245	238.53
XOZBUK01	InChI=1S/C6H5NO3/c8-7(9)4-3-6-2-1-5-10-6/h1-5H/b4-3+	12	6	H5C6O3N	1869.8987	-	332.3	584.11	O=N(=O)/C=C/c1ccco1	12.58942	4.35892	238.08
YAXCEH	InChI=1S/C17H13N/c1-2-13-18-16-9-5-3-7-14(16)11-12-15-8-4-6-10-17(15)18/h1	3-12H	13H2	8	2	H13C17N	2460.2218	-	404.6	442.08	C#CCN1c2ccccc2C=Cc2c1cccc2	9.98809	4.61144	167.40
YAXCEH01	InChI=1S/C17H13N/c1-2-13-18-16-9-5-3-7-14(16)11-12-15-8-4-6-10-17(15)18/h1	3-12H	13H2	8	1	H13C17N	2480.9636	-	404.6	458.45	C#CCN1c2ccccc2C=Cc2c1cccc2	9.99715	4.62834	176.63
YEGJID	InChI=1S/C14H13NO/c1-11-7-5-6-10-13(11)14(16)15-12-8-3-2-4-9-12/h2-10H	1H3	(H	15	16)	4	1	H13C14ON	1147.9135	400	416.8	440.77	O=C(c1ccccc1C)Nc1ccccc1	10.58457	5.63833	147.63
YEGJID01	InChI=1S/C14H13NO/c1-11-7-5-6-10-13(11)14(16)15-12-8-3-2-4-9-12/h2-10H	1H3	(H	15	16)	8	1	H13C14ON	2401.5811	400	416.8	338.37	O=C(c1ccccc1C)Nc1ccccc1	8.1602	3.61077	148.35
YEJNAC	InChI=1S/C12H9N3O3/c16-10-7-5-9(6-8-10)13-14-11-3-1-2-4-12(11)15(17)18/h1-8	16H	8	2	H9C12O3N3	2218.1186	-	448.9	474.9	Oc1ccc(cc1)[N][N]c1ccccc1N(=O)=O	12.00009	4.53944	129.88
YEJNAC01	InChI=1S/C12H9N3O3/c16-10-7-5-9(6-8-10)13-14-11-3-1-2-4-12(11)15(17)18/h1-8	16H	2	1	H9C12O3N3	552.3293	-	448.9	456.59	Oc1ccc(cc1)[N][N]c1ccccc1N(=O)=O	11.51532	3.88695	128.85
YEPRAN	InChI=1S/C23H25N3/c1-23(2)14-19(13-20(15-23)21(16-24)17-25)6-5-18-7-9-22(10-8-18)26-11-3-4-12-26/h5-10	13H	3-4	11-12	14-15H2	1-2H3/b6-5+	2	1	H25C23N3	987.7129	-	480	284.3	N#CC(=C1C=C(/C=C/c2ccc(cc2)N2CCCC2)CC(C1)(C)C)C#N	8.52459	4.55061	107.65
YEPRAN02	InChI=1S/C23H25N3/c1-23(2)14-19(13-20(15-23)21(16-24)17-25)6-5-18-7-9-22(10-8-18)26-11-3-4-12-26/h5-10	13H	3-4	11-12	14-15H2	1-2H3/b6-5+	4	1	H25C23N3	1996.9626	-	480	375.48	N#CC(=C1C=C(/C=C/c2ccc(cc2)N2CCCC2)CC(C1)(C)C)C#N	10.01732	3.85602	120.91
YIDLEC	InChI=1S/C8H6N2O5/c11-8-2-1-6(3-4-9(12)13)5-7(8)10(14)15/h1-5	11H/b4-3+	4	1	H6C8O5N2	911.4279	424	402.2	478.6	O=N(=O)/C=C/c1ccc(c(c1)N(=O)=O)O	12.10738	2.94689	154.52
YIDLEC01	InChI=1S/C8H6N2O5/c11-8-2-1-6(3-4-9(12)13)5-7(8)10(14)15/h1-5	11H/b4-3+	4	1	H6C8O5N2	867.4165	424	402.2	569.25	O=N(=O)/C=C/c1ccc(c(c1)N(=O)=O)O	12.81075	4.50477	185.03
YUJGIT	InChI=1S/C13H11N3O2/c17-16(18)13-8-6-11(7-9-13)10-14-15-12-4-2-1-3-5-12/h1-10	15H/b14-10+	4	1	H11C13O2N3	1234.9883	-	422.2	323.26	O=N(=O)c1ccc(cc1)/C=N/Nc1ccccc1	8.86371	1.51186	119.39
YUJGIT01	InChI=1S/C13H11N3O2/c17-16(18)13-8-6-11(7-9-13)10-14-15-12-4-2-1-3-5-12/h1-10	15H/b14-10+	8	1	H11C13O2N3	2419.061	-	422.2	387.44	O=N(=O)c1ccc(cc1)/C=N/Nc1ccccc1	10.91329	3.25715	119.23
YUYHIJ	InChI=1S/C7H8O3/c1-2-6-7(9)5(8)3-4-10-6/h3-4	9H	2H2	1H3	4	1	H8C7O3	668.0281	-	344.4	519.52	CCc1occc(=O)c1O	11.80451	5.58101	194.28
YUYHIJ01	InChI=1S/C7H8O3/c1-2-6-7(9)5(8)3-4-10-6/h3-4	9H	2H2	1H3	18	1	H8C7O3	3009.795	-	344.4	538.38	CCc1occc(=O)c1O	12.16229	6.47024	188.99
YUYHIJ02	InChI=1S/C7H8O3/c1-2-6-7(9)5(8)3-4-10-6/h3-4	9H	2H2	1H3	2	1	H8C7O3	337.8578	-	344.4	495.84	CCc1occc(=O)c1O	10.20754	4.2806	238.37
YUYPUD	InChI=1S/C8H4N2/c9-5-7-3-1-2-4-8(7)6-10/h1-4H	2	1	H4C8N2	326.615	-	339.1	537.61	N#Cc1ccccc1C#N	10.61615	2.91136	237.84
YUYPUD01	InChI=1S/C8H4N2/c9-5-7-3-1-2-4-8(7)6-10/h1-4H	4	1	H4C8N2	641.1717	-	339.1	444.86	N#Cc1ccccc1C#N	8.93667	2.52991	242.68
ZECZIQ	InChI=1S/C17H12O2/c18-17-12-14(11-10-13-6-2-1-3-7-13)15-8-4-5-9-16(15)19-17/h1-12H/b11-10+	4	1	H12C17O2	1276.3538	-	425.4	419.77	O=c1cc(/C=C/c2ccccc2)c2c(o1)cccc2	10.41372	3.21754	140.93
ZECZIQ01	InChI=1S/C17H12O2/c18-17-12-14(11-10-13-6-2-1-3-7-13)15-8-4-5-9-16(15)19-17/h1-12H/b11-10+	4	2	H12C17O2	1256.8441	-	425.4	450.54	O=c1cc(/C=C/c2ccccc2)c2c(o1)cccc2	11.65835	3.99343	131.64
ZEDPIH	InChI=1S/C9H8O2/c10-9(11)7-6-8-4-2-1-3-5-8/h1-7H	(H	10	11)/b7-6-	8	2	H8C9O2	1567.4262	341	354.4	415.33	OC(=O)/C=C\c1ccccc1	8.65952	2.98017	209.42
ZEDPIH01	InChI=1S/C9H8O2/c10-9(11)7-6-8-4-2-1-3-5-8/h1-7H	(H	10	11)/b7-6-	4	1	H8C9O2	757.7501	341	354.4	380.47	OC(=O)/C=C\c1ccccc1	7.43808	4.94394	162.49
ZENQDX	InChI=1S/C10H8N2O2/c13-11-9-6-5-7-3-1-2-4-8(7)10(9)12-14/h1-6	13-14H/b11-9+	12-10-	4	1	H8C10O2N2	867.5261	438	390.2	560.67	O/N=C/1\C(=N\O)\C=Cc2c1cccc2	10.24761	3.40631	258.47
ZENQDX01	InChI=1S/C10H8N2O2/c13-11-9-6-5-7-3-1-2-4-8(7)10(9)12-14/h1-6	13-14H/b11-9+	12-10-	8	1	H8C10O2N2	1781.0009	438	390.2	465.18	O/N=C/1\C(=N\O)\C=Cc2c1cccc2	10.5311	4.03714	200.83
ZEPFAB	InChI=1S/C31H23NO2/c1-32-30(33)28(26(22-14-6-2-7-15-22)23-16-8-3-9-17-23)29(31(32)34)27(24-18-10-4-11-19-24)25-20-12-5-13-21-25/h2-21H	1H3	4	1	H23C31O2N	2399.9364	-	516.5	343.01	CN1C(=O)[C]([C](C1=O)[C](c1ccccc1)c1ccccc1)[C](c1ccccc1)c1ccccc1	9.59727	4.10419	100.13
ZEPFAB01	InChI=1S/C31H23NO2/c1-32-30(33)28(26(22-14-6-2-7-15-22)23-16-8-3-9-17-23)29(31(32)34)27(24-18-10-4-11-19-24)25-20-12-5-13-21-25/h2-21H	1H3	2	1	H23C31O2N	1195.7346	-	516.5	371.14	CN1C(=O)[C]([C](C1=O)[C](c1ccccc1)c1ccccc1)[C](c1ccccc1)c1ccccc1	10.6309	6.5615	97.41
ZEXREZ	InChI=1S/C18H16/c1-3-7-15-13(5-1)9-11-17(15)18-12-10-14-6-2-4-8-16(14)18/h1-8H	9-12H2/b18-17+	4	1	H16C18	1268.0148	440	396.9	567.38	c1ccc2c(c1)/C(=C/1\CCc3c1cccc3)/CC2	9.38917	3.5765	295.24
ZEXREZ01	InChI=1S/C18H16/c1-3-7-15-13(5-1)9-11-17(15)18-12-10-14-6-2-4-8-16(14)18/h1-8H	9-12H2/b18-17+	8	2	H16C18	2549.8795	440	396.9	364.95	c1ccc2c(c1)/C(=C/1\CCc3c1cccc3)/CC2	10.36536	3.43251	124.79
ZILHOR	InChI=1S/C10H11NO/c1-8(2)10(12)11-9-6-4-3-5-7-9/h3-7H	1H2	2H3	(H	11	12)	8	1	H11C10ON	1824.0913	358	378.7	408.26	O=C(C(=C)C)Nc1ccccc1	8.32561	3.38619	191.24
ZILHOR02	InChI=1S/C10H11NO/c1-8(2)10(12)11-9-6-4-3-5-7-9/h3-7H	1H2	2H3	(H	11	12)	4	1	H11C10ON	915.8752	358	378.7	403.59	O=C(C(=C)C)Nc1ccccc1	8.71045	3.16118	190.07
ZIWVIK	InChI=1S/C18H22O2/c1-19-17-13-9-3-5-11(7-9)15(13)18(20-2)16-12-6-4-10(8-12)14(16)17/h9-12H	3-8H2	1-2H3/t9-	10-	11+	12+	2	1	H22C18O2	721.8405	385	397.1	412.18	COc1c2[C@@H]3CC[C@H](c2c(c2c1[C@@H]1CC[C@H]2C1)OC)C3	9.27889	4.63998	170.42
ZIWVIK01	InChI=1S/C18H22O2/c1-19-17-13-9-3-5-11(7-9)15(13)18(20-2)16-12-6-4-10(8-12)14(16)17/h9-12H	3-8H2	1-2H3/t9-	10-	11+	12+	2	2	H22C18O2	722.8002	385	397.1	456.87	COc1c2[C@@H]3CC[C@H](c2c(c2c1[C@@H]1CC[C@H]2C1)OC)C3	10.00181	5.21998	180.58
ZOWSUZ	InChI=1S/C12H12N2O3/c15-12-3-1-2-10(8-12)13-9-4-6-11(7-5-9)14(16)17/h4-8	13H	1-3H2	4	1	H12C12O3N2	1142.2125	461	429.8	530.7	O=C1CCCC(=C1)Nc1ccc(cc1)N(=O)=O	11.46434	4.23042	188.44
ZOWSUZ01	InChI=1S/C12H12N2O3/c15-12-3-1-2-10(8-12)13-9-4-6-11(7-5-9)14(16)17/h4-8	13H	1-3H2	4	1	H12C12O3N2	1131.3526	461	429.8	499.45	O=C1CCCC(=C1)Nc1ccc(cc1)N(=O)=O	11.34166	3.75441	173.20
ZZZBLP02	InChI=1S/C14H8Cl2/c15-13-5-1-3-9-7-10-4-2-6-14(16)12(10)8-11(9)13/h1-8H	4	1	H8C14Cl2	1097.3519	-	398.3	581.54	Clc1cccc2c1cc1c(c2)cccc1Cl	10.72769	2.70424	247.39
ZZZBLP03	InChI=1S/C14H8Cl2/c15-13-5-1-3-9-7-10-4-2-6-14(16)12(10)8-11(9)13/h1-8H	4	1	H8C14Cl2	1103.5307	-	398.3	549.29	Clc1cccc2c1cc1c(c2)cccc1Cl	10.48039	2.97385	225.02
ZZZIYE03	InChI=1S/C14H8O2/c15-13-11-7-3-1-5-9(11)10-6-2-4-8-12(10)14(13)16/h1-8H	8	2	H8C14O2	1973.6005	-	407.3	530.6351	O=C1C(=O)c2ccccc2c2c1cccc2	11.7909	3.38955	171.73
ZZZIYE06	InChI=1S/C14H8O2/c15-13-11-7-3-1-5-9(11)10-6-2-4-8-12(10)14(13)16/h1-8H	8	2	H8C14O2	1964.742	-	407.3	464.8659	O=C1C(=O)c2ccccc2c2c1cccc2	12.0546	3.71866	149.27
ZZZKPE01	InChI=1S/C6H12O2/c7-5-3-1-2-4-6(5)8/h5-8H	1-4H2/t5-	6-/m0/s1	8	1	H12C6O2	1285.3323	376	314.9	454.17	O[C@H]1CCCC[C@@H]1O	9.20814	5.60511	246.38
ZZZKPE07	InChI=1S/C6H12O2/c7-5-3-1-2-4-6(5)8/h5-8H	1-4H2/t5-	6-/m1/s1	8	1	H12C6O2	1335.0139	376	314.9	455.75	O[C@@H]1CCCC[C@H]1O	9.68181	4.59065	392.48
ZZZMGS02	InChI=1S/C13H10N4O6/c1-8-2-4-9(5-3-8)14-13-11(16(20)21)6-10(15(18)19)7-12(13)17(22)23/h2-7	14H	1H3	4	1	H10C13O6N4	1370.9224	439	462.6	426.47	Cc1ccc(cc1)Nc1c(cc(cc1N(=O)=O)N(=O)=O)N(=O)=O	12.37934	4.90532	112.10
ZZZMGS03	InChI=1S/C13H10N4O6/c1-8-2-4-9(5-3-8)14-13-11(16(20)21)6-10(15(18)19)7-12(13)17(22)23/h2-7	14H	1H3	4	1	H10C13O6N4	1362.3691	439	462.6	426.82	Cc1ccc(cc1)Nc1c(cc(cc1N(=O)=O)N(=O)=O)N(=O)=O	11.46621	5.89195	112.84
ZZZMUC08	InChI=1S/C7H5N3O6/c1-4-6(9(13)14)2-5(8(11)12)3-7(4)10(15)16/h2-3H	1H3	8	2	H5C7O6N3	1765.4863	355	404.5	559.11	O=N(=O)c1cc(N(=O)=O)c(c(c1)N(=O)=O)C	13.50074	6.98123	143.31
ZZZMUC09	InChI=1S/C7H5N3O6/c1-4-6(9(13)14)2-5(8(11)12)3-7(4)10(15)16/h2-3H	1H3	8	2	H5C7O6N3	1766.6612	355	404.5	485.7683	O=N(=O)c1cc(N(=O)=O)c(c(c1)N(=O)=O)C	13.56782	7.19654	116.84
ZZZNQS04	InChI=1S/C11H12O3/c1-2-14-10-6-4-3-5-9(10)7-8-11(12)13/h3-8H	2H2	1H3	(H	12	13)/b8-7+	8	1	H12C11O3	2037.0322	408	393.3	410.81	CCOc1ccccc1/C=C/C(=O)O	9.06491	3.59173	179.24
ZZZNQS05	InChI=1S/C11H12O3/c1-2-14-10-6-4-3-5-9(10)7-8-11(12)13/h3-8H	2H2	1H3	(H	12	13)/b8-7+	2	1	H12C11O3	497.4451	408	393.3	402.64	CCOc1ccccc1/C=C/C(=O)O	10.0671	4.06356	184.85
ZZZZCB02	InChI=1S/C15H22O3/c1-2-3-4-5-6-7-12-18-14-10-8-13(9-11-14)15(16)17/h8-11H	2-7	12H2	1H3	(H	16	17)	2	1	H22C15O3	699.504	374	421	292.11	CCCCCCCCOc1ccc(cc1)C(=O)O	10.59144	5.00009	102.50
ZZZZCB03	InChI=1S/C15H22O3/c1-2-3-4-5-6-7-12-18-14-10-8-13(9-11-14)15(16)17/h8-11H	2-7	12H2	1H3	(H	16	17)	2	1	H22C15O3	699.4944	374	421	304.95	CCCCCCCCOc1ccc(cc1)C(=O)O	11.79433	5.95	101.46
